# Supplementary material
Source: PubMed Central journal article supplement (PMC4469793)
Supplement: supp_dyu049_mlsfhijeprofile-paper-appendix.pdf [file supp_dyu049_mlsfhijeprofile-paper-appendix.pdf]

## **APPENDIX**

This Appendix provides additional information about the MLSFH study areas and study contexts, the sampling for the MLSFH and the refreshment of the MLSFH sample over time, and the procedures for HIV testing and counseling that were implemented as part of the MLSFH. This Appendix also provides comparisons of the MLSFH study populations with nationally representative datasets, analyses of attrition in the MLSFH sample, and discussions of some specific features of the MLSFH data that have been widely used across many MLSFH-based papers. Some of the information provided in this Appendix was previously published, but often scattered across multiple publications. It is integrated and combined here for the first time.

### **Content:**

|      |                                                                                                                        |    |
|------|------------------------------------------------------------------------------------------------------------------------|----|
| A1   | MLSFH study areas and context                                                                                          | 1  |
| A2   | MLSFH sampling methods and related relevant data collection procedures                                                 | 4  |
| A2.1 | MLSFH-sampling                                                                                                         | 4  |
| A2.2 | MLSFH 2007 Migration Follow-up                                                                                         | 9  |
| A2.3 | Longitudinal identification and linkage of MLSFH respondents                                                           | 11 |
| A2.4 | Common and distinctive features of the MLSFH fieldwork during 1998–2012                                                | 12 |
| A3   | MLSFH HIV testing and counseling (HTC)                                                                                 | 14 |
| A3.1 | 2004 MLSFH HTC and MLSFH experimental design offering financial incentives for learning HIV status in 2004             | 17 |
| A3.2 | 2006 MLSFH HIV testing and counseling (HTC)                                                                            | 19 |
| A3.3 | 2008 and 2012 MLSFH HTC                                                                                                | 23 |
| A3.4 | Comparison of MLSFH HIV prevalence to other population-based estimates                                                 | 23 |
| A4   | Comparisons of the MLSFH with national representative samples:                                                         | 23 |
| A5   | Analyses of attrition in the MLSFH                                                                                     | 29 |
| A6   | Specific features of the MLSFH data and study design                                                                   | 38 |
| A6.1 | Social network data in the MLSFH                                                                                       | 39 |
| A6.2 | Household/family rosters in the MLSFH                                                                                  | 40 |
| A6.3 | Probabilistic expectation data in the MLSFH                                                                            | 44 |
| A6.4 | Marital histories and sexual behaviors                                                                                 | 50 |
| A6.5 | Spouse, children and parent linkages in the MLSFH                                                                      | 52 |
| A6.6 | MLSFH Incentives Study: an experimental design offering financial incentives for maintaining HIV status during 2006–07 | 54 |
| A6.7 | MLSFH 2009 Biomarker Study                                                                                             | 58 |
| A6.8 | 2012 MLSFH mature adults survey on mental health and well-being:                                                       | 62 |
|      | Additional References Cited in Appendix                                                                                | 65 |

### **A1. MLSFH study areas and context**

Malawi is ranked 153 of 169 countries in terms of the Human Development Index (HDI).<sup>51</sup> The large majority of the population (84.7%) is rural. Population growth continues to be relatively rapid. The Malawi population increased at an average rate of 2.8% from 10.7 to 15.9 million during 1998–2012, the period covered by the MLSFH, and a tripling to 48 million is projected within the next 50 years (UN

medium variant).<sup>52,53</sup> Life expectancy at birth was 51 for men and 55 for women in 2010, and healthy life expectancy at birth was 44 years for males and 46 years for females.<sup>54</sup> About 15% of the population is considered “ultra-poor”, i.e., with an estimated food consumption below the minimum level of dietary energy requirement.<sup>55</sup> While per capita income is below the SSA average, Malawi is similar to other SSA countries and countries in the World Bank low-income country (LIC) group in terms of life expectancy, infant mortality, children’s malnutrition, access to clean water, literacy and schooling enrollment.<sup>56,57</sup> In rural areas, where the MLSFH study population is based, the majority of individuals engage in home production of crops, primarily maize, which is the dietary staple and is highly influenced by the vagaries of the weather and the availability of fertilizer: during the period of the MLSFH, there were several years with “hunger months”, when maize production was insufficient. Subsistence agriculture is complemented by some smallholder cash crops (primarily tobacco and cotton), casual agricultural labor and small-scale market activities, such as selling second-hand clothing and vegetables. Marriage is nearly universal in rural Malawi, with more than 96% of women having ever married by age 25–29, and more than 95% of men having ever married by age 30–34.<sup>27</sup> Malawi has the globally 9th highest prevalence of HIV in the adult population with an estimated 2010 HIV prevalence among 14–49 year olds of 8.9% (women: 10.5%; men: 7.1%) in rural and 17.4% (women: 22.7%; men: 12.0%) in urban areas.<sup>27,58</sup> HIV incidence is estimated to have peaked in the mid-1990s, and by 2012 had fallen to .44, well below replacement level.<sup>58</sup> Nevertheless, the HIV epidemic had, and continues to have, major effects on virtually all aspects of life, many of which were documented by the MLSFH. With aid from international donors, access to antiretroviral treatment (ART) in Malawi expanded during the past decade, attaining a 67% ART coverage (with eligibility for treatment based on WHO 2010 guidelines) in 2011, resulting in significant reductions in adult mortality.<sup>58,59</sup> Tuberculosis, malaria, and endemic parasites (e.g., soil-transmitted helminths (STH) and schistosomiasis) also have a relatively high prevalences,<sup>60,61</sup> as do some chronic diseases such as hypertension.<sup>62</sup> As a result, physical health tends to decline fairly rapidly as individuals age (Figure A1), and so does mental health.<sup>63,64</sup>

The MLSFH is based in three districts in rural Malawi that have been the study sites since 1998: Rumphu in the north, Mchinji in the center, and Balaka in the south (Figure 1). In all of these three regions, the primary source of livelihood for MLSFH respondents is subsistence agriculture. Transportation networks are relatively rudimentary with paved primary roads and generally unpaved secondary roads, which may be impassable during the rainy season. Communication infrastructure has importantly changed during the period observed by the MLSFH. Cell phones were absent when the MLSFH was initiated in 1998, but have spread rapidly since, and 37% of MLSFH respondents owned a cell in 2010. While the three MLSFH study regions are generally similar in terms of their overall epidemiological, socioeconomic and subsistence-agriculture characteristics,<sup>60,65</sup> the regions are heterogeneous in terms of marriage patterns,<sup>44</sup> religious affiliations,<sup>66</sup> school-

Figure A1: SF12 physical health score among 2010 MLSFH respondents by age

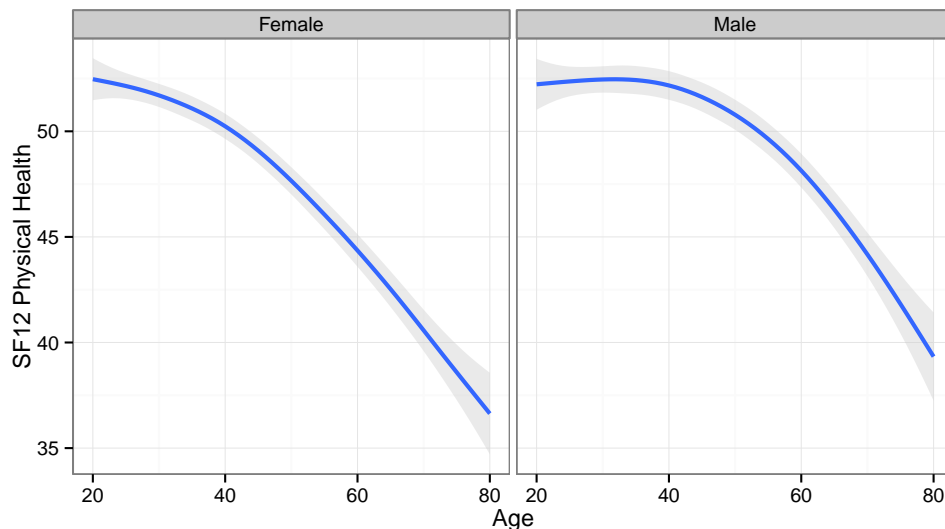

Notes: At age 20–40, the SF12 physical health score in the MLSFH has a mean of 51.6 (females) and 52.4 (males), with a standard deviation of 7.2 and 6.1 respectively. The average SF12 physical health score for a 60 year old women is therefore more than 1 SD below the mean of 20–40 year old women, with health rapidly declining further with age; the average SF12 physical health score of a 60 year old male is .6 SDs below below the mean of 20–40 year old men, again, with further substantial declines at older ages.

ing,<sup>67</sup> patrilineal vs. matrilineal inheritance and land-ownership,<sup>68</sup> and HIV prevalence.<sup>23,27</sup> Rumphu District, located in the northern region of the country, follows the patrilineal system of kinship and lineage where residence is primarily patrilocal, inheritance is traced through sons, and parents of a groom pay bride wealth. The northern district, inhabited primarily by Tumbukas, is predominantly Protestant. Mchinji District, located in the central region, follows a less rigid matrilineal system whereby residence may be matrilineal or patrilocal or neither (among MLSFH participants in Mchinji, about 75% follow a patrilocal tradition). The Center is primarily inhabited by Chewas, with almost equal proportions of Catholics and Protestants. Balaka District, which is located in the southern region, is primarily inhabited by Lomwes and Yaos and has the highest proportion of Muslims. The region follows a matrilineal system of kinship and lineage system where residence is ideally matrilineal, although it is not uncommon for wives to live at least some period of time in their husband's village. The Balaka region also exhibits a lower age of sexual debut and larger numbers of lifetime sexual partners than the other MLSFH study regions, and residents tend to be less educated and poorer than those living in the north, leading to higher levels of migration. HIV/AIDS prevalence in the southern region is significantly higher than in the northern and central region.

Work effort in Malawi is highly seasonal (Figure A2).<sup>69</sup> The peak labor demand season occurs during the rainy season, which coincides with the hunger season, a time when the poorest households many households may be reduced to one meal

Figure A2: Seasonality of harvest and labor demand in Malawi

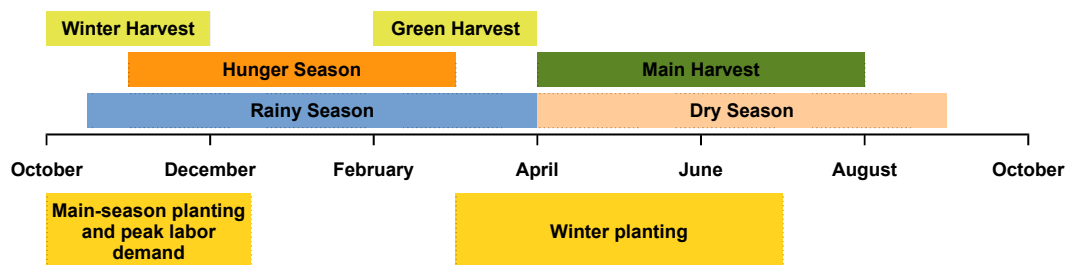

Source: Adapted from USAID & FEWS NET (2012).<sup>69</sup>

of watery porridge a day. An ethnographer working in village in southern Malawi wrote that towards the end of the hunger season, “farmers’ eyes grow increasingly hollow, their faces shrunk, and their bodies frail. [...] Activities are reduced to a minimum; villagers lie listlessly in the shade of their huts, waiting for the hours to pass and the maize to mature.”<sup>70</sup> Because the hunger season is also the rainy season, it is the height of the malaria season, when people are more likely to be ill.

## A2. MLSFH sampling methods and related relevant data collection procedures

### A2.1. MLSFH-sampling

The initial MLSFH sample was established in 1998. The MLSFH study sample was augmented in 2004 by adding the MLSFH Adolescent Sample, and in 2008 by adding the MLSFH Parent Sample. In addition, ongoing additions occurred as a result of enrolling new spouses of respondents. Table A1 reports the size, age range (25th and 75th percentile) and gender distribution of the MLSFH study population during 1998–2012 (see also Figure 2). The details of the MLSFH sampling procedures are described below.

Table A1: Size, age range (25th and 75th percentile) and gender distribution of the MLSFH study population 1998–2012

| MLSFH | N     | Age (percentile) |      | Prop female | N from previous round | % re-inter viewed at next round |
|-------|-------|------------------|------|-------------|-----------------------|---------------------------------|
|       |       | 25th             | 75th |             |                       |                                 |
| 1998  | 2,597 | 25               | 42   | 0.59        | –                     | 75.0                            |
| 2001  | 2,546 | 28               | 44   | 0.62        | 1,949                 | 73.5                            |
| 2004  | 3,261 | 22               | 43   | 0.55        | 1,872                 | 78.1                            |
| 2006  | 3,431 | 24               | 44   | 0.55        | 2,546                 | 76.8                            |
| 2008  | 4,036 | 27               | 53   | 0.58        | 2,635                 | 74.8                            |
| 2010  | 3,798 | 28               | 54   | 0.59        | 3,020                 | 90.3†                           |
| 2012  | 1,266 | 50               | 67   | 0.57        | 1,266                 | –                               |

† among mature adults eligible for 2012 MLSFH

**A2.1.a. Initial MLSFH Sample:** The original 1998 MLSFH target sample was 500 ever-married women age 15–49 in each district, plus their husbands (for additional information, see <http://malawi.pop.upenn.edu/malawi-documentation-sampling>). The sampling strategy adopted for the three districts differed in order to permit comparison with earlier surveys. In Mchinji and Rumphi districts the sample was designed to cover Census Enumeration Areas (CEAs) included in the 1988 Traditional Methods of Child Spacing in Malawi (TMCSM) survey. However, since the TMCSM sampled women regardless of their marital status, the CEAs included in the TMCSM survey had fewer ever-married women than the MLSFH target sample of 500 women in each district. Three neighboring CEAs covered by the 1988 survey were thus added to the MLSFH Round 1 sample. In each district a cluster sampling strategy was used in all villages in the selected CEAs. Household lists of those normally resident in those villages were compiled during the week prior to fieldwork, and a sample of eligible women was then randomly selected. Since villages varied in size, sampling fractions were inversely proportional to village populations, such that a higher proportion of eligible women in the smaller villages was sampled. In Balaka district, a somewhat different procedure was followed to allow the evaluation of a Community Based Distribution (CBD) initiative that was conducted in this area at the time, following an earlier baseline survey conducted by the German aid agency GTZ (now GIZ) with 1098 women and men in 1993. A random subset of 4/7 of the CBD villages and 5/11 of the non-CBD villages from this study were selected as MLSFH study villages. A random 1 in 4 sample of women of reproductive age (15–49) and their husbands was then drawn from these villages to yield a target sample of 500 women and their husbands. To further increase the number of MLSFH respondents who participated in the 1993 GTZ survey, an additional 260 women and 125 men were randomly drawn from the GTZ sampling lists (divided equally between the CBD and non-CBD areas) and enrolled in the MLSFH. In total, across all three regions, the MLSFH Round 1 in 1998 enrolled a sample of slightly more than 1,500 ever-married women aged 15–49 and close to 1,100 of their spouses residing in about 120 study villages (Table A2 and Figure 2).

The sampling strategy was not designed to be representative of the national population of rural Malawi. As Table A3 shows, however, our sample characteristics closely match the characteristics of the rural population of the 1996 Malawi Demographic and Health Survey (MDHS). We do not expect perfect alignment with the rural MDHS sample, since the MDHS clusters are not identical to a MDICP village; moreover, the MDHS includes small trading centers, which the MLSFH does not, thus making the MLSFH less urban.

**A2.1.b. MLSFH Respondent follow-up, migration and vital status:** The MLSFH returned to the study areas in 2001, 2004, 2006, 2008, 2010 and 2012 to reinterview the MLSFH study population. For this purpose, the MLSFH maintained a respondent database that contained previously collected identifying information for each respondent (respondents name, compound name, village name and GPS coordinates, etc.). Using this existing identifying information, MLSFH interviewers attempted

**Table A2: Summary statistics for the MLSFH Round 1 (1998) study population**

|                                        | <b>Females</b> | <b>Males</b> | <b>Total</b> |
|----------------------------------------|----------------|--------------|--------------|
|                                        | mean           | mean         | mean         |
|                                        | (sd)           | (sd)         | (sd)         |
| # of observations                      | 1,532          | 1,065        | 2,597        |
| Respondent's age (in 1998)             | 32.45          | 38.78        | 35.04        |
|                                        | (13.16)        | (12.21)      | (13.15)      |
| Age group (in 1998)                    |                |              |              |
| < 20                                   | 0.123          | 0.008        | 0.076        |
| 20–29                                  | 0.381          | 0.271        | 0.336        |
| 30–39                                  | 0.270          | 0.293        | 0.279        |
| 40–49                                  | 0.136          | 0.248        | 0.182        |
| 50–59                                  | 0.039          | 0.108        | 0.067        |
| 60–69                                  | 0.022          | 0.060        | 0.038        |
| 70+                                    | 0.029          | 0.012        | 0.022        |
| Marital status                         |                |              |              |
| <i>Married</i>                         | 0.870          | 0.990        | 0.919        |
| <i>Separate</i>                        | 0.026          | 0.005        | 0.017        |
| <i>Divorced</i>                        | 0.076          | 0.006        | 0.047        |
| <i>Widowed</i>                         | 0.029          | 0.000        | 0.017        |
| Children ever born                     | 4.21           | 5.17         | 4.60         |
|                                        | (3.00)         | (4.10)       | (3.52)       |
| Schooling attainment                   |                |              |              |
| <i>No formal schooling</i>             | 0.358          | 0.218        | 0.301        |
| <i>Primary schooling</i>               | 0.589          | 0.634        | 0.607        |
| <i>Secondary or higher</i>             | 0.053          | 0.148        | 0.092        |
| Religion                               |                |              |              |
| <i>Christian</i>                       | 0.764          | 0.745        | 0.756        |
| <i>Muslim</i>                          | 0.217          | 0.225        | 0.220        |
| <i>Other/none</i>                      | 0.020          | 0.030        | 0.024        |
| Wealth indicator: House has metal roof | 0.078          | 0.077        | 0.078        |
| Region of residence                    |                |              |              |
| <i>Central</i>                         | 0.353          | 0.358        | 0.355        |
| <i>South</i>                           | 0.332          | 0.335        | 0.333        |
| <i>North</i>                           | 0.315          | 0.307        | 0.312        |
| Worried about getting AIDS             |                |              |              |
| <i>Not worried at all</i>              | 0.167          | 0.258        | 0.204        |
| <i>Worried a little</i>                | 0.208          | 0.190        | 0.200        |
| <i>Worried a lot</i>                   | 0.625          | 0.553        | 0.596        |

to contact and reinterview MLSFH participants in each of the follow-up years. If MLSFH participants were absent at the first interviewer visit, up to two additional follow-up visits were made. Except for a migration follow-up studies in 2007 and 2013, MLSFH respondents were not followed if they had migrated outside of the MLSFH study villages. However, they remained in the MLSFH sampling frame, and were interviewed at subsequent MLSFH waves if they returned to a MLSFH study village (as was common since a significant amount of migration was tempo-

**Table A3: Comparison between 1998 MLSFH and 1996 Malawi Demographic and Health Survey (MDHS)**

|                                 | % ever-married women aged 15–49 |             |
|---------------------------------|---------------------------------|-------------|
|                                 | MLSFH (1998)                    | MDHS (1996) |
| Age: 15–19                      | 8.4                             | 10.3        |
| 20–24                           | 22.3                            | 21.2        |
| 25–29                           | 21.8                            | 16.5        |
| 30–34                           | 15.1                            | 16.0        |
| 35–39                           | 15.4                            | 12.2        |
| 40–44                           | 9.7                             | 14.5        |
| 45–49                           | 7.2                             | 9.2         |
| Schooling: <i>None</i>          | 33.5                            | 48.1        |
| <i>Primary</i>                  | 60.8                            | 50.4        |
| <i>Secondary or higher</i>      | 5.7                             | 1.5         |
| Number of surviving children: 0 | 3.8                             | 12.5        |
| 1                               | 21.6                            | 18.5        |
| 2                               | 18.2                            | 17.4        |
| 3                               | 15.4                            | 14.5        |
| 4                               | 13.0                            | 12.6        |
| 5                               | 11.3                            | 7.8         |
| 6                               | 7.5                             | 7.7         |
| 7+                              | 9.2                             | 9.0         |
| Owns a radio                    | 57.4                            | 43.1        |
| Ever used contraception         | 32.0                            | 38.2        |
| Currently using contraception   | 22.5                            | 16.4        |
| Observations (N)                | 1478                            | 1123        |

Notes: The Malawi Demographic and Health Survey (MDHS) 1996<sup>71</sup> was a nationally representative sample survey conducted in 1996 and designed to provide estimates of family planning and health indicators for the three administrative regions of the country, urban and rural areas, and Malawi as a whole. For the comparison with the 1998 MLSFH, the MDHS is restricted to rural subsample.

Source: (author?)<sup>72</sup>

rary). On average, the MLSFH succeeded during 2001–1998 in re-interviewing between about 73–78% of the respondents interviewed at the previous MLSFH wave (Figure 2). When a MLSFH participant could not be found and contacted for a MLSFH follow-up interview, the MLSFH conducted a short interview with family members and/or neighbors to obtain essential information about the vital status and migration of the MLSFH respondent. Based on this information, the respondent's status in the MLSFH was recorded as classified as *dead*, *migrated*, *refused*, *hospitalized*, *temporarily absent*, *other*, and *unknown*. Conditional on successfully contacting a MLSFH respondents, refusals to participation in the MLSFH have been very low across all MLSFH waves (< 3% up to 2008, and < 5% in 2010).

**A2.1.c. MLSFH Sample Additions:** Additions to the MLSFH have occurred primarily through three mechanisms: new spouses, the 2004 adolescent sample, and the 2008 parent sample. We discuss these three mechanisms in turn. (i) *New spouses:* The initial MLSFH sample in 1998 included 1,532 ever-married women aged 15–49 and their spouses. In the 2001 round of data collection, the MLSFH attempted to re-interview all of these initial MLSFH respondents and their current spouses; that is, if a MLSFH respondent divorced and remarried, or in the case of polygamous men, added an additional wife, the MLSFH added the current wife (all current wives) of the initial MLSFH participants. However, spouses who were not part of the initial MLSFH sample were not followed and retained in the 2001 MLSFH if they divorced or their spouses died. Starting with the 2004 MLSFH, the study retained all MLSFH study participants; that is, from 2004 onward, once an individual was interviewed for the MLSFH once, for instance after being enrolled as a new spouse, the MLSFH made an attempt to re-interview the respondent at all subsequent waves. (ii) *2004 Adolescent Sample:* In 2004, to compensate for the aging of the initial MLSFH sample and the underrepresentation of unmarried individuals at adolescent and young adult ages, the MLSFH added an adolescent sample in 2004 ( $N = 998$ ). For this purpose, two household rosters were collected in each sampled community as part of the 2004 MLSFH data collection. The first was collected from all households in the sampled villages—that is, MLSFH and non-MLSFH households—during a household listing interview in which all members of all households in the MLSFH were enumerated along with basic demographic characteristics. The second household roster was incorporated into the primary MLSFH survey instrument administered to all female MLSFH participants to enumerate all eligible adolescents who were part of existing MLSFH households. To allow for intergenerational analyses, all adolescents aged 15–25 listed as members of the existing MLSFH households and residing in the MLSFH study villages were enrolled into the MLSFH adolescent sample, constituting about 1/3 of the adolescent sample. The remaining members of the MLSFH adolescent sample were selected from the household listing conducted for non-MLSFH households using an age-stratified sampling strategy that adjusted for the differential ages at marriage between gender and MLSFH study regions (for additional information, see <http://malawi.pop.upenn.edu/malawi-documentation-sampling>). (iii) *2008 MLSFH Parent Sample:* To increase the suitability of the MLSFH to study intergenerational aspects and the health of older individuals in Malawi, a parent sample was added to the MLSFH in 2008. This new sample of parents of MLSFH respondents was drawn from family listings from MLSFH respondents in 2006 (because of the respondents' young age, parents of MLSFH respondents in the 2004 adolescent sample were not included). All living biological parents who resided in the same village as the respondent were included in the 2008 MLSFH new sample of parents. Based on this approach, approximately 800 parents of MLSFH respondents living in the MLSFH study villages were added to the 2008 MLSFH sample ( $N = 549$ ). As a result of adding the MLSFH parent sample, the age range covered



**Table A4: First available MLSFH Round for MLSFH participants in 2010 and 2012**

| First available<br>MLSFH Round | MLSFH 6 (2010)<br>Respondents |              |              | MLSFH 7 (2012)<br>Respondents |              |              |
|--------------------------------|-------------------------------|--------------|--------------|-------------------------------|--------------|--------------|
|                                | <i>Females</i>                | <i>Males</i> | <i>Total</i> | <i>Females</i>                | <i>Males</i> | <i>Total</i> |
| 1998                           | 39.79%                        | 35.81%       | 38.15%       | 50.14%                        | 54.61%       | 52.05%       |
| 2001                           | 9.13%                         | 7.10%        | 8.29%        | 11.60%                        | 10.89%       | 11.30%       |
| 2004                           | 11.82%                        | 23.53%       | 16.64%       | 0.97%                         | 6.64%        | 3.40%        |
| 2006                           | 9.18%                         | 11.45%       | 10.11%       | 2.49%                         | 3.87%        | 3.08%        |
| 2008                           | 20.41%                        | 13.55%       | 17.59%       | 34.81%                        | 23.99%       | 30.17%       |
| 2010                           | 9.67%                         | 8.57%        | 9.22%        | –                             | –            | –            |
| <i>N</i>                       | 2,234                         | 1,564        | 3,798        | 724                           | 542          | 1,266        |

by the MLSFH was substantially extended in 2008 (Table 1). Moreover, since a parent enrolled through this process could be the parent of multiple MLSFH respondents (some of the MLSFH respondents are siblings), a manual data cleaning was used to identify all duplicate parent nominations and correct parent-child linkages were established, which as a side effect, also enables us to identify sibling MLSFH respondents in the data.

Among approximately 3,800 respondents interviewed in the 2010 MLSFH, 44.1% were from the original MLSFH sample drawn in 1998, 19.5% were from the 2004 adolescent sample, 12.5% from the 2008 parent sample, and the remainder (23.9%) was new spouses that have been added during 2001–2010.

In 2012, the MLSFH focused on mature adults, defined as MLSFH respondents aged 45 and over, with a specific focus on physical/mental health and aging ( $N_{2012} = 1,266$ ). Only MLSFH mature adults who were interviewed in both 2008 and 2010 were eligible for the 2012 MLSFH, so that at least three rounds of data were available for each 2012 MLSFH respondent.

To highlight the potential of long-term longitudinal analyses with the MLSFH, Table A4 reports the *first* available MLSFH survey round for participants in the 2010 and 2012 MLSFH Rounds (MLSFH 6 & 7). It shows, that for more than 46% of the 2010 MLSFH participants, and for more than 63% of the 2012 MLSFH participants, initial data are available from either 1998 or 2001. Hence, for close to two-thirds of the mature adults interviewed in 2012, more than a decade of longitudinal MLSFH data are available, and for 63% of the 2010 MLSFH participants, initial MLSFH data are available from at least 2004 onward.

#### **A2.2. MLSFH 2007 Migration Follow-up**

The MLSFH 2007 migration follow-up aimed to collect data on respondents who were interviewed by the MLSFH prior to the 2006 waves, but could not be located at the 2006 round of the MLSFH.<sup>2</sup> Specifically, the 2006 MLSFH interviewed approximately 70% of the target sample members. Absence due to migration (as reported by family members or neighbors) was the most frequent reason why in-

dividuals were not interviewed: approximately 18% of the 2006 MLSFH sample moved sometime between the first wave in 1998 and the fourth wave in 2006. Of these migrants, 11% moved outside of Malawi and no attempts were made to reach them.

The target sample for the migration study consisted of 718 men and women who had been interviewed at least once by the MLSFH prior to 2006 and who had subsequently relocated permanently within Malawi (to an urban or rural area). Of the 718 migrants in the target sample, the 2007 migration study team traced approximately 60% and interviewed 56% (N = 400) (the remaining 4% were dead, were hospitalized, or refused to be interviewed). Of respondents who were not traced by the migration team, approximately 28% were not found at the location described in their migration autopsy. Often, the family members or neighbors could provide only a general location, which is not surprising because street names and house numbers are rare even in urban areas of Malawi. When information was specific, it was occasionally incorrect. The default was to search by name, which was problematic because migrants sometimes changed their name after migration and were therefore not known at their place of destination. Background information for the 718 migrants that compose the MLSFH migration study target sample and the 400 migrants found by the migration study team in 2007 are shown in Table A5. Differences in migration patterns reflect differences in migration by region, sex, and age. In the target sample, more men from the matrilineal South migrated (46%) than men from the other two regions, and more women from the patrilineal North migrated (40%) than women from the Center or South. Although either the husband or the wife may move at marriage, women typically marry at younger ages than men.<sup>44</sup> The age and sex distribution of the migrants who were located is roughly similar to the age distribution of the migration target sample. Of the 718 MLSFH respondents who moved within Malawi, 20% (146 migrants) moved to an urban area. The most common urban destination was Lilongwe, the centrally located nation's capital, where approximately 31% of all rural-urban MLSFH migrants were living. For MLSFH respondents, a slightly larger percentage of male migrants moved to an urban area than female migrants (23% for men and 19% for women). Statistical tests show no significant differences in urban residence between migrants who were located by the migration team and those who were not.

Approximately 31% of migrants moved for marriage-related reasons (divorce, widowhood, or new marriage), compared with 39% who moved for work. Reasons for migration in Table A5 were asked directly of migrants interviewed by the migration study team in 2007. Women were more likely to move for marriage than for work, and men were more likely to move for work than for marriage. The "other" category groups all reasons for migration that did not fit into the above categories—for example, to attend school, to visit a relative, to follow parents or relatives to a new location, and because of imprisonment.

An update of the 2007 MLSFH Migration Follow-up was conducted during 2013, focusing on MLSFH respondents who were interviewed at least once dur-

**Table A5: Background characteristics for migration study respondents: Target sample and respondents interviewed by migration team**

| Characteristics           | Target Sample |      |       | Sample Interviewed |      |       |
|---------------------------|---------------|------|-------|--------------------|------|-------|
|                           | Female        | Male | Total | Female             | Male | Total |
| Age Distribution (%)      |               |      |       |                    |      |       |
| 10–19                     | 12.4          | 8.1  | 10.4  | 12.6               | 10.0 | 11.5  |
| 20–29                     | 31.4          | 22.2 | 27.1  | 34.6               | 22.4 | 29.4  |
| 30–39                     | 31.1          | 29.2 | 30.2  | 29.9               | 30.0 | 29.9  |
| 40–49                     | 18.8          | 21.9 | 20.2  | 17.3               | 19.4 | 18.2  |
| 50–59                     | 5.0           | 14.1 | 9.2   | 4.3                | 13.5 | 8.2   |
| 60–69                     | 1.4           | 4.6  | 2.9   | 1.3                | 4.7  | 2.7   |
| Region of Origin (%)      |               |      |       |                    |      |       |
| Central                   | 30.1          | 25.9 | 28.3  | 28.6               | 27.7 | 28.2  |
| South                     | 29.9          | 46.2 | 37.0  | 27.7               | 41.8 | 33.7  |
| North                     | 40.0          | 27.9 | 34.7  | 43.7               | 30.5 | 38.1  |
| Reason for Migration (%)  |               |      |       |                    |      |       |
| Marriage-related          | 41.0          | 17.1 | 30.6  | 49.3               | 16.5 | 35.4  |
| Work-related              | 29.4          | 51.3 | 39.0  | 20.4               | 45.3 | 27.9  |
| Other                     | 29.6          | 31.6 | 30.4  | 30.3               | 38.2 | 36.7  |
| Rural-Urban Migration (%) | 18.5          | 22.8 | 20.4  | 19.1               | 21.2 | 20.0  |
| <i>N</i>                  | 402           | 316  | 718   | 231                | 171  | 402   |

Notes: Reasons for migration for migrants not interviewed are from the migration autopsies, which were administered to relatives or friends of the migrant.

Source: (author?)<sup>2</sup>

ing 2004–2008, but not in 2010 (the most recent MLSFH round covering all MLSFH respondents). The data collection has been completed, and data entry is currently ongoing. According to the migrant tracking information collected in 2013, migration patterns among these ever-interviewed MLSFH respondents are highly clustered ( $N \approx 1,150$ ): 64% had moved within the same district (often related to marriage/divorce); 12% had moved to one of Malawi’s four largest cities (Blantyre, Lilongwe, Mzuzu, Zomba); and 24% had moved to another rural/peri-urban area. MLSFH Survey data, using a study instrument similar to the 2010 MLSFH Questionnaire and augmented with additional questions related to migration, and updated HIV status information was collected for these MLSFH migrants in 2013 (with data collection completed and data entry ongoing at the time of this writing).

### **A2.3. Longitudinal identification and linkage of MLSFH respondents**

Ensuring a correct longitudinal identification of MLSFH respondents was challenging in rural Malawi due to the absence of well-defined addresses, frequent mobility of individuals, and relatively common marriage/divorce that often results in migration.<sup>73</sup> The MLSFH also encountered community members to who claimed to be MLSFH study participants (“imposters”), even though they were not (often a family member was).

To maintain a high quality of the MLSFH longitudinal linkages and overcome

these challenges, the MLSFH employed several steps in its fieldwork and data collection, including: (1) relying on fieldwork personnel who have been working with MLSFH consistently for several years to identify and address problems in the field during data collection, (2) employing our knowledge of the local setting, including identifying villages where challenges are greatest, and becoming aware of these challenges in advance, and (3) using our longitudinal data during data collection, in which background characteristics (such as spouse's name, level of education, birthplace, father's name) from current MLSFH data collection is compared with the same information from previous waves to ensure that the correct respondent has been interviewed, and correcting immediately if not. To provide these identifying data during fieldwork, the MLSFH maintains a MLSFH Respondent Database that contains previously collected identifying information for each respondent (respondent's name and ID, previously taken pictures of respondents (if available), GPS coordinates of previous residence of respondents (since 2004), name of respondent's parents and current husband, selected respondent characteristics (age, sex, education), and name of village headman). During MLSFH fieldwork and data collection, daily interviewer lists were created for the interviewers containing contact information of respondents to be interviewed on a particular day. Interviewers used this information to locate respondents, and verify the identity of the respondent using the identifying information provided from the respondent database (including the printed picture of the respondent). Interviewers recorded the interview outcomes (interview completed, refused, respondent not present, respondent moved) on MLSFH Survey Log Sheets that were provided from the respondent database for each day. At the end of each day, the respondent database was updated with a log of the interview outcomes, and if applicable, the respondent database was updated in case that there have been any changes in a respondent's identifying or contact information (e.g., respondent has moved). The picture of each respondent that was taken as part of the 2006, 2008 and 2012 MLSFH was uploaded to the respondent database to replace any previously taken picture, and the questionnaire cover sheet (containing respondents name and other contact information) was removed from the remaining questionnaire that contains merely the respondent ID number (and no other identifying information). Using the above process, the MLSFH has been able to maintain a relatively high retention rate of respondents across waves (Figure 2), and incorrect identification of MLSFH study participants over time are rare.

#### ***A2.4. Common and distinctive features of the MLSFH fieldwork during 1998–2012***

Most of the MLSFH data collections during MLSFH rounds in 1998, 2001, 2004, 2006, 2008, 2010 and 2012 were conducted during May–August of the respective years. During this period, which coincides with the harvest seasons, individuals eat three meals a day and work effort is relatively low. MLSFH time use data show, for example, that 48.9% of MLSFH respondents performed agricultural labor during the period of the MLSFH data collection, 22.1% performed non-agricultural labor, and 69.9% performed domestic labor.<sup>74</sup>

Since 2006, the MLSFH has collaborated with Invest in Knowledge (IKI, [www.http://www.investinknowledge.org](http://www.investinknowledge.org)), a Malawi NGO that has founded by members of the MLSFH research team and specializes in research capacity building and data collection. For the survey data collections, interviewers were recruited for each MLSFH data collection in the each of the MLSFH study regions, often recruiting interviewers who have previously worked for the MLSFH or related IKI projects. During each round, interviewers received extensive training in survey data collection and the specific MLSFH survey instruments prior to the fieldwork. The MLSFH obtained approvals from the District Commissioner, District Health Officer, local police, Traditional Authorities and village headmen in each of the MLSFH study villages prior to any data collection in a village. Once a MLSFH study participant was located using the identifying information in the MLSFH Respondent Database, informed consent was obtained and the survey was conducted in the respondents' home using paper-and-pencil techniques. To ensure the confidentiality of the data, interviewers were instructed to select a location for the interviews that guarantees the privacy of the information provided by the respondent. At the end of each fieldwork day, each survey was reviewed and checked for inconsistencies and/or omissions, and interviewers returned to MLSFH participants when necessary to obtain missing information.

For HIV testing and counseling (and the biomarker collection in 2009), the MLSFH recruited and trained Ministry of Health-certified HTC counselors (and to ensure the confidentiality of HTC, only counselors from outside the MLSFH study villages were recruited). HTC was conducted, usually after the MLSFH survey, at the respondent's home (see Appendix A3 for additional detail).

In addition to the evolution of the topics covered by the MLSFH survey over time (Table 3), some distinctive features of some specific MLSFH rounds are noteworthy:

**A2.4.a. MLSFH 3 (2004):** The 2004 MLSFH refreshed the MLSFH study population at younger ages by enrolling the MLSFH Adolescent Sample (Appendix A2.1.c). For this purpose, prior to the main MLSFH survey, a household listing was conducted in all MLSFH study villages to obtain information about the resident population and the members of all village households in each of the MLSFH study villages. The sampling of the MLSFH Adolescent Sample is described above (Appendix A2.1.c). The 2004 MLSFH is also noteworthy because it was the first MLSFH round that collected biomarkers for HIV and other sexually transmitted diseases (Appendix A3.1). The 2004 MLSFH also implemented a randomized experiment that offered financial incentives to respondents who decided to learn their HIV test results (Appendix A3.1).

**A2.4.b. MLSFH 4 (2006):** As in 2004, the 2006 MLSFH included both survey data collection and testing for HIV (Appendix A3.2). To accommodate a substantially expanded MLSFH questionnaire (see Table 3 for a summary of MLSFH 4 survey measurements), the survey team of the MLSFH 4 (2006) was split up into a household-listing team that located and identified respondents and then collected the newly

introduced extensive household/family rosters that asked respondents about their resident and non-resident household and family members along with information on their health and transfer/exchange relations (Appendix A6.2). A MLSFH survey team then followed up within a few days of the household listing team to collect additional survey data from each MLSFH respondent that was successfully located and identified by the household listing team. Finally, a team of HTC counselors visited all MLSFH respondents with a completed household listing to conduct HIV testing and counseling (Appendix A3.2). In contrast to the 2004 HTC, the MLSFH offered both individual and couple HTC as part of the 2006 MLSFH HTC. Subsequent to the 2006 MLSFH data collection and HTC, the MLSFH implemented an experimental design that offered financial incentives to respondents who maintained their HIV status during 2006–07 (Appendix A6.6). As part of this study, the MLSFH also collected “sexual diaries” that provide detailed day-to-day data on sexual behaviors for four 10-day periods during 2006–07. In addition, a 2007 MLSFH Migration Follow-up study was conducted to trace, survey and HIV test all ever-interviewed MLSFH respondents not interviewed during MLSFH 4 (2006) due to migration and/or temporary absence (Appendix A2.2).

**A2.4.c. MLSFH 5 (2008):** The 2008 MLSFH expanded the MLSFH study sample at older ages by adding the MLSFH Parent Sample (Appendix A2.1.c). The complete MLSFH study population was then contacted by a single survey team (see Table 3 for a summary of MLSFH 5 survey measurements), which was followed by the HTC team for HIV testing.

**A2.4.d. MLSFH 6 (2010):** The 2010 MLSFH was largely identical to the previous 2008 MLSFH round (see Table 3 for a summary of MLSFH 6 survey measurements), except that no HIV testing was conducted given the observed low HIV incidence in the MLSFH study population and the already comprehensive MLSFH data on the HIV status of study population.

**A2.4.e. MLSFH 7 (2012):** To develop a stronger aging-related MLSFH research agenda, the research team conducted in 2012 a MLSFH mature adults survey on mental health and well-being. This survey focused on mature adults, that is, MLSFH respondents aged 45 and older, who had previously been interviewed in the 2008 and 2010 MLSFH. A total of 1,266 MLSFH mature adults were interviewed (Figure 2) using a questionnaire that continued key elements of the 2008 and 2010 data collections (Table 3) and newly added detailed measures of mental health, cognitive function, and physical performance (see Appendix A6.8) for additional information).

### **A3. MLSFH HIV testing and counseling (HTC)**

HIV testing was conducted as part of the MLSFH in 2004, 2006, 2008 and 2012 using HTC counselors certified by the Malawi Ministry of Health. Figure A3 shows the HIV prevalence by age among 2008 MLSFH respondents. The MLSFH also documents 50 HIV incident cases during 2004–08, 45 of which occurred among MLSFH respondents aged 25–49 in 2006. The HIV incidence rate observed among

Figure A3: HIV prevalence among 2008 MLSFH respondents by age

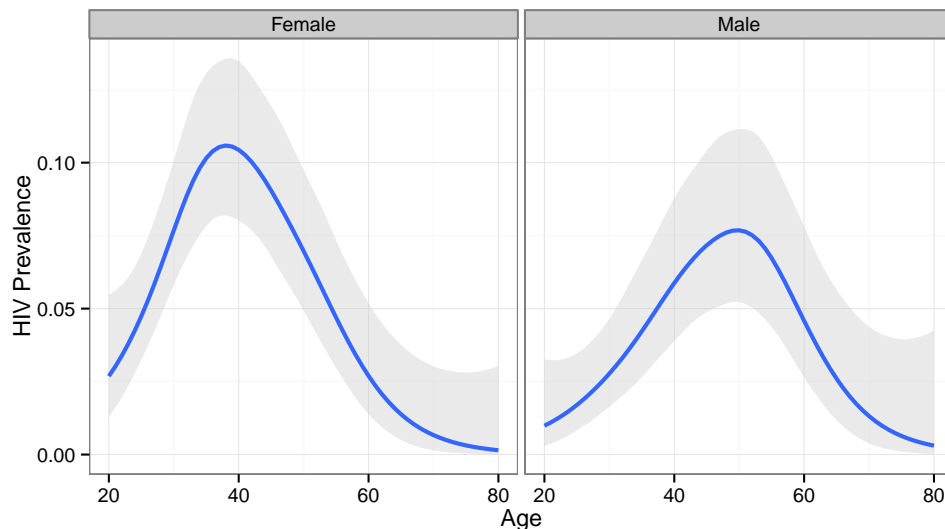

Notes: For respondents with at least one valid MLSFH HIV test during 2006–08. Respondents with at least one HIV-positive MLSFH HIV test during 2006–2008 are considered as being HIV-positive, all others are considered being HIV-negative at the 2008 MLSFH Round (MLSFH 5).

MLSFH respondents during 2004–08 was 0.63 per 100 person years (95% CI: 0.47–0.84), higher among women (incidence rate = 0.74 per 100 person years, 95% CI: 0.52–0.84) than among men (incidence rate = 0.47 per 100 person years, 95% CI: 0.28–0.79), although this difference in incidence rates is not statistically significant ( $p = .15$ ).

The HTC procedures followed guidelines given by the Malawi Ministry of Health and the WHO,<sup>75,76</sup> and written consent was obtained from all HTC participants prior to HTC. In 2004, HIV testing was conducted through the collection of oral swab specimens that were analyzed in a central lab in Lilongwe using ELISA and confirmatory Western blot tests. MLSFH HIV testing was conducted using finger-prick rapid tests from 2006 onward. The different HIV testing and counseling protocols, and the 2004 experimental design that offered randomized financial incentives for individuals to learn their HIV status, are described below. To ensure the confidentiality of HTC and the HIV test results, the MLSFH implemented several privacy and data protection measures, including the use of separate IDs and data file for survey data and HTC-related data, non-local HTC counselors who had never lived nor had close relatives or friends in the MLSFH study villages, a secure storage of consent forms, the separation of identifying information from all study materials containing HIV test results and related information, and adequate protections to ensure the privacy of the in-home HTC sessions.

MLSFH HIV testing was conducted using finger-prick rapid tests from 2006 onward (see Appendix A3 for additional details). In 2004, the MLSFH tested respondents also for chlamydia, gonorrhoea and trichomoniasis in addition to HIV,

but tests of these sexually transmitted diseases were not repeated given their low prevalence in the 2004 MLSFH study population. The MLSFH has also collected *anthropometric data* (height, weight and BMI) in 2008 and 2012 (Appendix A6.7 and A6.8), and selected biomarker-based indicators of health (CRP, HDL, LDL and others) in 2009 for a subset of MLSFH respondents residing in Balaka (Appendix A6.7).

In addition to collecting extensive survey data, the MLSFH has also conducted repeated *HIV testing and counseling (HTC)* at respondents' homes (see Appendix A3 for details). In 2004, HIV testing was conducted using oral swab specimens that were then sent for analysis to the University of North Carolina laboratory in Lilongwe using ELISA and confirmatory Western blot tests.

In 2004, HIV testing was conducted using oral swab specimens that were then sent for analysis to the University of North Carolina laboratory in Lilongwe using ELISA and confirmatory Western blot tests. Due to the use of lab-based HIV testing (rather than rapid HIV tests) in 2004, the test results were made available to respondents 2–4 months after the sample collection in local HTC centers established by the MLSFH. The percentage of individuals who obtained their test results was 67% in 2004. It varied from about 34% among MLSFH respondents who were not offered a monetary incentive for learning their HIV test result to close to 80% among those who were offered an incentive.<sup>6</sup> MLSFH HIV testing was conducted using finger-prick rapid tests from 2006 onward (see Appendix A3 for additional details). 98% of MLSFH respondents in 2006 wanted to learn their HIV status when the HTC test results were available immediately given the use of rapid HIV testing kits. HTC participation in 2006 was 96% among those who learned their HIV status as part of the MLSFH in 2004, and it was 83% and 91% respectively among those tested for the first time by the MLSFH and those who did not learn their HIV status in 2004. The high acceptance rate of HTC during the MLSFH was importantly related to the fact that home-based HTC offered credible information on HIV status through a transparent process. Home-based HTC was also perceived as convenient and confidential, which was not necessarily the case for HTC offered at clinics.<sup>24,77</sup> Because these concerns contributed to the low uptake of HTC services offered at government clinics, substituting home-based HTC for clinic-based HIV testing can be one important approach for eliminating socioeconomic inequalities in access to and utilization of HTC.<sup>78</sup>

As part of the MLSFH HTC procedures, all HIV tests were preceded and followed by a counseling session. The pre-test counseling emphasized privacy and informed consent. The respondent chose the venue for the counseling that he/she considered most private; in order to provide a foundation for informed consent, counselors explained the procedures to be followed during testing, as well as the implications of learning one's own HIV status. Post-test counseling emphasized the results of the test, the window period and importance of retesting, and appropriate behavior for the future. Starting in 2008, when antiretroviral treatment (ART) had become available in the MLSFH study regions, HIV-positive respondents received referrals to district hospitals for confirmatory testing and determining of eligibility for ART.



**A3.1. 2004 MLSFH HTC and MLSFH experimental design offering financial incentives for learning HIV status in 2004**

The 2004 MLSFH asked all respondents—the vast majority (82%) of whom had not previously participated in HCT—to provide a biomarker sample for a lab-based HIV test as part of a randomized experiment to study the determinants of HCT uptake.<sup>6,23,79,80</sup> Rapid HIV testing and counseling had not yet been approved for use in Malawi at this time, and therefore an approach combining home-based collection of biomarkers, centralized lab-based testing of the specimen, and subsequent dissemination of HIV test results in MLSFH-established local HTC clinics was chosen. Specifically, between May and August of 2004, nurses from outside each area offered respondents free tests in their homes for HIV and three other sexually transmitted infections (STIs) (gonorrhea, chlamydia, and trichomoniasis). At the time that the HIV tests were offered, respondents were given pre-test counseling about HIV prevention strategies. Samples were taken through OraSure™ oral swabs (OraSure Technologies, USA) to test for HIV and through urine samples (for men) or self-administered vaginal swabs (for women) to test for other STIs. The oral swabs were tested for HIV in a central lab in Lilongwe using ELISA and confirmatory Western blot tests. Across the three districts, 2,894 of the 3,185 respondents who were offered accepted an HIV test (91%). The prevalence of STIs in 2004 was very low (3.0% positive and 3.1% inhibitory/inconclusive for gonorrhea, .25% positive and 3.3% inhibitory/inconclusive for chlamydia, and 2.4% positive for trichomoniasis).<sup>23</sup> HIV prevalence was 6.5% (plus .5% inconclusive results that may indicate a recent HIV infection), with significant regional variation (8.2% in Balaka, 6.6% in Mchinji and 4.7% in Rumphi) and gender difference (7.1% for women, 5.7% for men). After taking the HIV test samples, nurses gave each respondent vouchers redeemable upon obtaining either HIV or STI results. Voucher amounts were randomized by letting each respondent draw a token out of a bag indicating a monetary amount. In Mchinji and Balaka each respondent received two vouchers, one for obtaining HIV results, and one for obtaining STI results. In Rumphi, respondents received only one voucher redeemable by returning for either HIV or STI results. Analyses of these data generally used the combined HIV and STI incentive (the sum of the HIV and STI incentives).<sup>6,21,30,81</sup> The combined vouchers ranged between zero to 300 Kwacha (between zero to 3 Dollars at the exchange rates at the time), with an average total voucher amount (including zeros) of 101 Kwacha (1.01 Dollars), worth approximately a day's wage. The distribution of vouchers was carefully monitored to ensure that each nurse followed the rules of randomization. Each voucher included the amount, a respondent ID, and the nurse's signature; a carbon copy was made to prevent forgeries. Respondents who drew a zero token received no voucher; 22% received no incentive to return for either HIV or STI results. Drawing a "zero" may have had a demotivating effect on individuals wanting to attend the HTC, center which may have had an impact on attendance. Because all of the respondents participated in the "lottery" draw, it was impossible to estimate the potential effect of disappointment. However, this is

**Table A6: Descriptive statistics for participants in the 2004 MLSFH experimental design offering financial incentives for learning HIV status in 2004**

| Panel A: Respondent characteristics                             |       |         |
|-----------------------------------------------------------------|-------|---------|
| Male                                                            | 0.46  | (0.50)  |
| Age                                                             | 33.4  | (13.66) |
| Married                                                         | 0.71  | (0.45)  |
| Years of education                                              | 3.6   | (3.70)  |
| Owns land                                                       | 0.73  | (0.44)  |
| Panel B: Health                                                 |       |         |
| HIV positive                                                    | 0.063 | (0.24)  |
| Gonorrhea positive                                              | 0.032 | (0.18)  |
| Chlamydia positive                                              | 0.003 | (0.06)  |
| Trichomoniasis positive                                         | 0.024 | (0.15)  |
| Ever had an HIV test (before 2004)                              | 0.181 | (0.385) |
| Thinks treatment will be available in five years                | 0.341 | (0.474) |
| Reported having sex during 2004                                 | 0.761 | (0.43)  |
| Reported using condoms during 2004                              | 0.210 | (0.41)  |
| Panel C: Incentives, distance, and attendance at results centre |       |         |
| Monetary incentive (dollars)                                    | 1.01  | (0.90)  |
| Proportion receiving incentive > 0                              | 0.78  | (0.41)  |
| Monetary incentive (dollars, if incentive > 0)                  | 1.29  | (0.92)  |
| Distance to HTC centre (km)                                     | 2.02  | (1.27)  |
| Attended HTC centre                                             | 0.69  | (0.46)  |
| Attended HTC centre (if incentive = 0)                          | 0.34  | (0.47)  |
| <i>N</i>                                                        | 2,812 | –       |

*Notes:* The analyses included respondents who accepted a test for HIV in 2004 and had basic demographic data available in the MLSFH. The monetary incentive is a sum of an incentive for learning HIV results and an incentive for learning other STI results (in Mchinji and Balaka). Distance from assigned testing centers to respondents' homes is a straight-line spherical distance measured in kilometers.

*Source:* (author?)<sup>6</sup>

likely to have been minimal.

Descriptive statistics for the MLSFH population selected for the 2004 MLSFH experimental design offering financial incentives for learning HIV status are reported in Table A6, along with information about the average incentive offered and distance to HTC center.

Two to four months after sample collection, test results became available and temporary test results (HTC) centers, consisting of small portable tents, were placed randomly throughout the districts. Based on their geospatial (GPS) coordinates, respondents' households in villages were grouped into zones, and a location within each zone was randomly selected to place a tent. The average distance to a center was two kilometers and over 95% of those tested lived within five kilometers.

Distance to the HTC center was calculated as a straight line and does not account for roads or paths. In most cases, tents were placed in the exact randomly selected location and paths were created for easy accessibility. Baseline characteristics were similar across groups receiving any incentive amount (including zero) and living within various HTC zones. Although there were some statistically significant differences among these groups, they were small in magnitude.<sup>6</sup>

Respondents were personally informed of the hours of operation and location of their assigned center and centers were operational for approximately one week. Respondents were allowed to attend any of the HTC centers but were informed only of the location and hours of operation of their assigned center (fewer than 6% of respondents went to a center other than the one to which they were assigned). When they obtained their test results, respondents also received counseling. On average, nurses spent 30 minutes counseling each respondent about safe sexual practices, including abstinence and condom use, regardless of respondent's HIV test results. Couples were given their test results verbally and were informed of their results separately. Respondents could redeem their vouchers only after hearing their results. Those who were HIV- positive were referred to the nearest permanent clinic for further counseling. Those who were positive for other sexually transmitted diseases were also given free treatment at that time, which may have provided additional incentive to attend HTC centers, over and above the monetary incentive.

Approximately two months after results were available, respondents who tested for HIV in two districts, Balaka and Rumphu, were reinterviewed in their homes by interviewers who had no part in the testing and did not know the respondents' HIV status. Both those who had obtained their results and those who had not were approached for this follow-up interview. During this interview, respondents were asked about their sexual behavior in the prior two months and their attitudes toward condom use. At the end of the interview, respondents were given approximately 30 cents as appreciation for participation and were offered the opportunity to purchase condoms at half the subsidized retail price: five cents for a package of three condoms or two cents for a single condom. Respondents were allowed to purchase condoms only from the 30 cents they had just been given in order to prevent condom purchases from being correlated with any monetary incentive received two months prior at the results center.

### ***A3.2. 2006 MLSFH HIV testing and counseling (HTC)***

Starting in 2006, the MLSFH HTC used home-based rapid HIV testing procedures using parallel Determine HIV/1-2™ (Abbott Laboratories, USA) and UniGold™ HIV (Trinity Biotech, Ireland) test kits. MLSFH respondents were approached by the MLSFH HTC team after the completion of the 2006 MLSFH survey. The HTC team only approached MLSFH respondents who completed the 2006 MLSFH survey (and specifically, both the household/family rosters and the survey; but due to coordination problems between teams, also about 100 MLSFH respondents were tested for HIV for whom no household/family rosters and/or survey was col-

lected). A total of three attempts were made to locate each MLSFH respondent for HTC.

HIV testing using rapid HIV testing kits was offered at the respondents' homes. After the informed consent process, a brief survey on prior HIV testing was conducted, and blood was collected by a finger prick and immediately tested for HIV using the parallel Determine™ and UniGold™ HIV test kits. For MLSFH respondents who were still minors (age 17 and younger), informed consent was obtained from the parents and assent was obtained from the respondent. HTC participants were given a choice of receiving post-test counseling and results at their home immediately after the HIV test (results were available after about 20 minutes) or during a few days subsequent to the HIV test at a mobile clinic set up by the MLSFH in the study area. Virtually all of those who chose to receive their results did so at their homes. When the results of both tests were either concordant positive (reactive) or concordant negative (non-reactive), the HIV test results were given to the respondent. Although no discordant tests occurred in 2006, such test results would have been declared *inconclusive* and the respondent would have been referred to a nearby laboratory for subsequent confirmatory HTC.

A total of 2,987 respondents were successfully contacted and offered a HIV test; 2,758 (92%) were tested. Of those MLSFH sample members who were successfully contacted in 2006 for HTC, 26% had not been tested in 2004 because they refused (5%), were away at the time of the survey (4%) or were included in 2006 as new sample members—that is, new spouses to those already in the sample (17%). In addition, about a third (32%) of those who accepted a HIV test in 2004 were not tested in 2006 primarily due to mobility (12%), refusal (4%), death (1%) and inability to trace the respondent (15%). Loss to follow-up was somewhat higher in the South compared with the other two sites due to higher mobility and frequent name changes among respondents.

The specific procedures and logistics of the 2006 MLSFH HTC differed slightly across MLSFH respondents who were eligible for couple HTC as part of the MLSFH Incentive Study (Appendix A6.6), and MLSFH respondents who were offered only offered individual HTC. The difference are discussed below. Participants of the MLSFH Incentive Study were followed until March–August 2007, when they participated in a follow-up HTC that following the same HTC procedures as in 2006.

**A3.2.a. Couple HTC for the 2006 MLSFH Incentive Study sample:** Subsequent to the 2006 MLSFH HTC, the MLSFH implemented an Incentive Study that offered financial incentives to a subset of MLSFH respondents for maintaining their 2006 HIV status during an approximately 15-month period during 2006–07.<sup>1</sup> The MLSFH Incentive Study sample included all MLSFH individuals in discordant couples and a random subset of MLSFH respondents. A total of 1,407 adult individuals were offered to participate in the MLSFH Incentive Study during the 2006 MLSFH HTC (mean age = 35.8, SD = 13), and 1,307 accepted. The details of the study population and the experimental design are given below (Appendix A6.6). Because of the specific structure of this MLSFH Incentive Study, it was determined during the IRB ap-

proval process that participants in this study need to be offered the opportunity to participate in couple HTC. That is, married couples had to be given the opportunity to participate in HTC jointly, and through this couple HTC, learn both their own HIV status and that of their spouse. As a result, married individuals who were living with their spouse were offered couple-HTC. Individual HTC was offered to individuals in married couples if the spouse was absent or one of the two spouses declined to participate in couple HTC (either because he/she preferred individual HTC or didn't want to participate in HTC at all). A flow-diagram outlining the assignment to individual or couple HTC is shown in Figure A4. In polygamous marriages selected for the MLSFH Incentive Study, the husband and a randomly selected wife were selected for participation. In addition, couples were only assigned to the MLSFH Incentive Study and couple HTC if both partners were 18 or older.

For the individual HTC, the HTC followed essentially the same procedures as the HTC for MLSFH respondents who were not part of the MLSFH Incentive Study (see below). Individuals who did not give consent to HTC were no longer eligible for participation in MLSFH incentive study. The participants of the MLSFH Incentive study were also informed that if they choose not to participate in the individual-HTC at the follow-up visit, the change in their HIV status during 2006–07 could not be determined and they would not be eligible to receive any incentive payments during this study.

For couple HTC, eligible MLSFH respondents were first asked *individually* about their informed consent to participate in couple HTC. The informed consent process for couple HTC explicitly mentioned that participation in couple HTC would involve revealing the HIV status to their spouse, and respondents could opt out of couple HTC and choose either individual HTC or no HTC at all. As soon as one member of a married couple opted out of couple HTC, individual HTC was continued for both husband and wife.

For married couples where both agreed to couple HTC during the individual consent process, both were tested for HIV using parallel Determine™ and UniGold™ HIV test kits. The couple was then brought together for a post-test counseling that involved the discussion of the HIV status of both husband and wife.

After couple-HTC, all individuals irrespective of their and their spouse's HIV status received a description of the couple-based incentive study (see Appendix A6.6 for additional details). This description included that: (a) the study team will return in 12 months to determine the couple's HIV status; (b) the couple will receive a reward, determined by a lottery drawing, if the couple was willing to have their HIV status determined during a couple-HTC session at our second visit and if the couple maintains its current HIV status until this second visit in about 12 months. The couple was also informed that if they choose not to participate in the couple-HTC in 12 months, the change in their HIV status since the previous visit cannot be determined and they were not eligible to receive any reward payments, and they

Figure A4: MLSFH Incentive Study 2006–07: Individual-based and couple-based study design and informed consent procedure

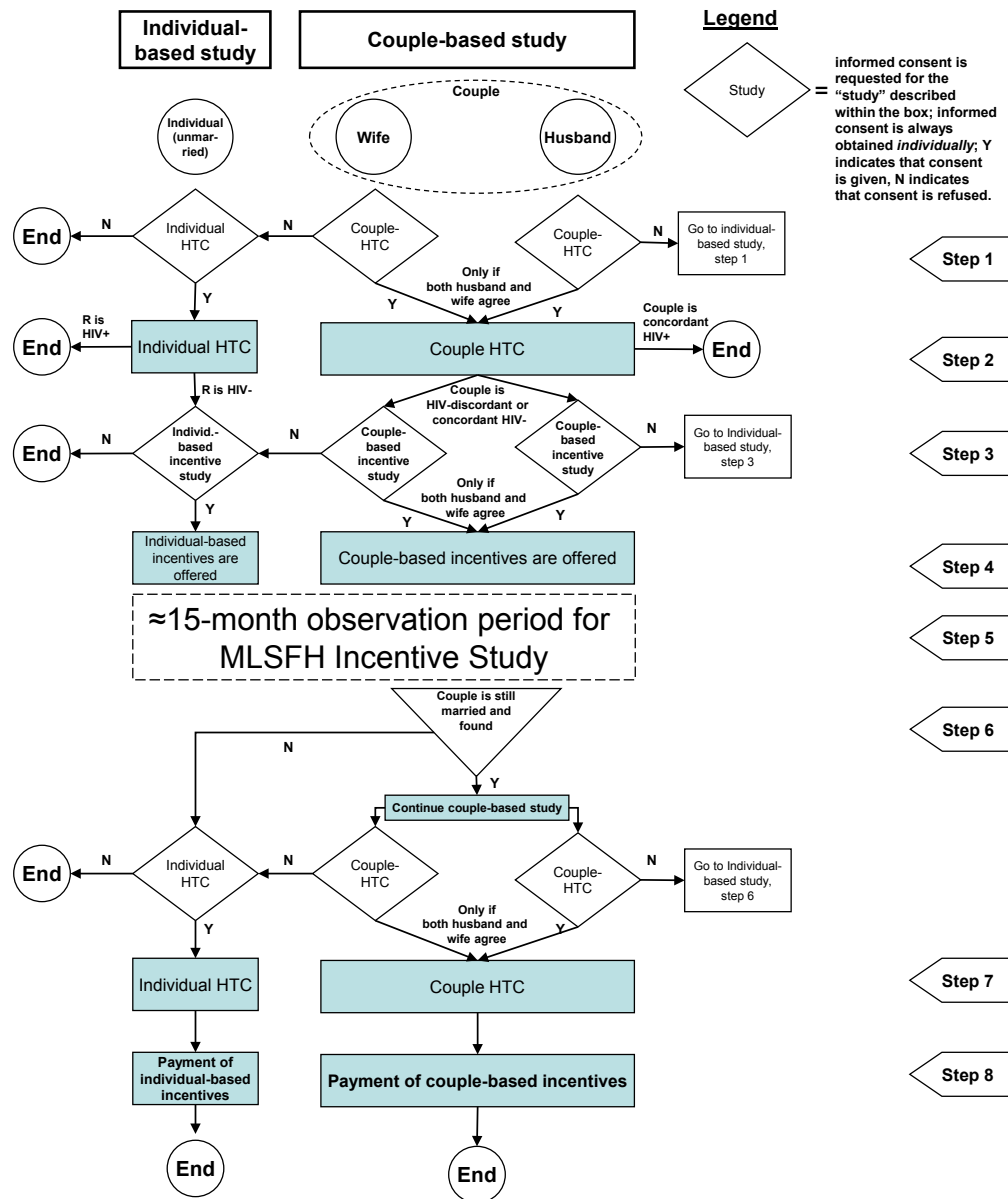

were informed about the available options if the couple separated, the spouse was not available at the follow-up HTC or refused to participate in the follow-up HTC.

The MLSFH study team returned to participants in the MLSFH Incentive Study after about 15 months with a follow-up HTC, following the same procedures for couple and individual HTC as described above (Figure A4).

**A3.2.b. Individual HTC during the 2006 MLSFH:** Individual HTC was offered to MLSFH respondents who (a) completed 2006 MLSFH survey both the household/family

rosters and the survey) and were *not* selected for the MLSFH Incentive Study, or (b) individuals who were initially selected for the MLSFH Incentive Study but then assigned to individual HTC during the study (see Figure A4). In individual HTC, the consent process, pre-test counseling, HIV testing using parallel Determine™ and UniGold™ HIV test kits, and post-test counseling were all conducted individually at the respondents home in an area that ensured adequate privacy. Post-test counseling included a discussion of the meaning of the result and HIV prevention strategies, a discussion of disclose of HIV test results to spouses, and for HTC participants who tested positive for HIV, a referral respondent to the nearest district hospital or HTC clinic for a confirmatory test and an assessment of the possibilities of treatment with antiretroviral treatment.

MLSFH respondents who participated in individual HTC and were selected for the MLSFH Incentive Study were informed about this study subsequent to HTC, and offered to participate (see Appendix A6.6 for additional detail). The participants in the MLSFH Incentive study were also informed that if they choose not to participate in the individual-HTC at the follow-up visit, the change in their HIV status during 2006–07 could not be determined and they would not be eligible to receive any incentive payments during this study.

### **A3.3. 2008 and 2012 MLSFH HTC**

The 2008 MLSFH HTC followed the same procedure of the 2006 individual HTC outlined above. All MLSFH respondents who completed the 2008 MLSFH survey were approached by the HTC team. In 2012, essentially the same HTC procedures were repeated, except that only MLSFH respondents age 45 who were eligible for the 2012 MLSFH survey were approached.

### **A3.4. Comparison of MLSFH HIV prevalence to other population-based estimates**

Both the 2004 and the 2006 MLSFH estimates of HIV prevalence are considerably lower than the estimates for rural Malawi based on data collected in 2003 from all the rural antenatal clinics (ANCs) in the national HIV surveillance system (15%). They are also lower than the estimates based on the 2004 Malawi Demographic and Health Survey (MDHS).<sup>82</sup> Age standardization, using the MDHS 2004 age distribution as the standard, did not significantly change the MLSFH estimates.<sup>23</sup> The 2008 MLSFH HIV prevalence is also lower as both the rural DHS estimates for 2004 and 2010. A potential explanation for the variations in the HIV prevalence estimates between the MLSFH and the MDHS is sampling variability coupled with the geographic variation in HIV prevalence. HIV prevalence has, for instance, been found to be higher near the market centers than in the rural villages.<sup>83</sup> The MLSFH sample probably consists of a larger proportion of individuals from the rural villages than the MDHS or ANCs; hence, the lower prevalence.

### **A4. Comparisons of the MLSFH with national representative samples:**

While the initial sampling strategy of the MLSFH was not designed to be representative of the national population of rural Malawi (Appendix A2.1), the initial sample characteristics closely matched the characteristics of the rural population of the

**Table A7: Age distribution of the 2010 MDHS and 2010 MLSFH sample populations**

| Age   | North |                    | Central |       | South  |                    | All Sites |                    |
|-------|-------|--------------------|---------|-------|--------|--------------------|-----------|--------------------|
|       | MDHS  | MLSFH              | MDHS    | MLSFH | MDHS   | MLSFH              | MDHS      | MLSFH              |
| 15–19 | 23.5  | 2.5                | 22.7    | 1.3   | 22.5   | 2.0                | 22.7      | 1.9                |
| 20–24 | 18.7  | 20.3 <sup>ns</sup> | 19.1    | 15.1  | 17.9   | 21.9               | 18.5      | 19.1 <sup>ns</sup> |
| 25–29 | 17.5  | 21.1               | 17.1    | 23.2  | 18.4   | 20.9 <sup>ns</sup> | 17.8      | 21.7               |
| 30–34 | 13.3  | 15.0 <sup>ns</sup> | 13.6    | 16.5  | 14.8   | 14.2 <sup>ns</sup> | 14.1      | 15.2 <sup>ns</sup> |
| 35–39 | 11.3  | 14.4               | 11.6    | 16.6  | 11.7   | 13.7 <sup>ns</sup> | 11.6      | 14.9               |
| 40–44 | 8.1   | 14.1               | 8.2     | 16.1  | 7.8    | 14.1               | 8.0       | 14.8               |
| 45–49 | 7.7   | 12.7               | 7.8     | 11.4  | 6.9    | 13.2               | 7.4       | 12.4               |
| Total | 100.0 | 100.0              | 100.0   | 100.0 | 100.0  | 100.0              | 100.0     | 100.0              |
| N     | 4,746 | 896                | 9,109   | 863   | 11,929 | 844                | 25,784    | 2,603              |

Notes: (a) T-tests for statistically significant differences between MDHS and MLSFH are significant at  $p < 0.05$  or higher for all categories except those labeled *ns* = not significant. (b) MDHS: The 2010 Malawi Demographic and Health Survey (2010 MDHS)<sup>27</sup> was implemented by the National Statistical Office (NSO) from June through November 2010, with a nationally representative sample of more than 27,000 households. All eligible women age 15–49 in these households and all eligible men age 15–54 in a subsample of one-third of the households were individually interviewed. The primary objectives of the 2010 MDHS project were to provide up-to-date information on fertility levels; nuptiality; sexual activity; fertility preferences; awareness and use of family planning methods; breastfeeding practises; nutritional status of mothers and young children; early childhood mortality; maternal mortality; maternal and child health; malaria; awareness and behaviour regarding HIV/AIDS and other sexually transmitted infections; and HIV prevalence. (c) Table is restricted to ages 15–49 for both MDHS and MLSFH, and MDHS includes only rural sub-sample.

1996 Malawi Demographic and Health Survey (MDHS) (Table A3).<sup>72</sup> After three rounds of longitudinal data collection during 1998–2004, despite attrition and the enrollment of new subjects, the 2004 MLSFH sample remained in close agreement in observable characteristics with the nationally-representative 2004 MDHS (rural sub-population).<sup>50</sup> We update these earlier comparisons based the 2010 MLSFH and MDHS. Since the MDHS is restricted to ages 15–49 (for women), we focus on the respective age range in the MLSFH as well. Given the rural nature of the MLSFH, we also restrict the MDHS to the rural sub-sample.

Table A7 compares the age distribution of the 2010 MDHS and MLSFH sample populations. As is expected, even in the 15–49 age range, the MLSFH study population is significantly older than the MDHS study population. The MLSFH contains a significantly smaller fraction of respondents at ages 15–19, while older ages are overrepresented in the MLSFH (plus, the MLSFH contains a substantial number of respondents older than age 49, see Table A1, that are not included in the comparisons with the MDHS). This difference in the age distribution of the MLSFH and the representative MDHS is expected given the aging of the MLSFH study population over time, and the fact that the MLSFH was last refreshed at younger ages in 2004 through the MLSFH adolescent sample—the members of which are now at least 23 years old. In terms of characteristics other than age, Table A8 shows that, the



Table A8: 2010 MDHS and 2010 MLSFH sample characteristics

|                         | North |                    | Central |                    | South |       | All Sites |       |
|-------------------------|-------|--------------------|---------|--------------------|-------|-------|-----------|-------|
|                         | MDHS  | MLSFH              | MDHS    | MLSFH              | MDHS  | MLSFH | MDHS      | MLSFH |
| <b>Panel A: Females</b> |       |                    |         |                    |       |       |           |       |
| Primary+ schooling      | 96.2  | 98.5               | 82.4    | 81.2 <sup>ns</sup> | 80.3  | 60.8  | 84.0      | 80.1  |
| Currently married       | 61.6  | 87.4               | 60.3    | 83.5               | 58.9  | 86.3  | 59.9      | 85.8  |
| Married > once          | 17.5  | 18.9 <sup>ns</sup> | 22.9    | 27.8               | 28.8  | 39.1  | 24.7      | 28.6  |
| # children ever born    | 3.2   | 4.2                | 3.3     | 5.0                | 3.2   | 4.7   | 3.3       | 4.6   |
| # living children       | 2.8   | 3.6                | 2.8     | 3.8                | 2.7   | 3.8   | 2.7       | 3.7   |
| <b>Panel B: Males</b>   |       |                    |         |                    |       |       |           |       |
| Primary+ schooling      | 97.8  | 99.2               | 91.6    | 90.4 <sup>ns</sup> | 92.1  | 82.5  | 93.0      | 91.1  |
| Currently married       | 47.8  | 78.5               | 53.7    | 86.0               | 52.5  | 87.7  | 52.1      | 83.9  |
| Married > once          | 24.1  | 35.4               | 27.6    | 37.4               | 33.1  | 40.0  | 29.5      | 37.6  |
| # children ever born    | 2.8   | 3.5                | 3.0     | 4.4                | 2.9   | 4.2   | 2.9       | 4.0   |
| # living children       | 2.4   | 3.1                | 2.5     | 3.7                | 2.4   | 3.5   | 2.5       | 3.4   |

Notes: Restricted to ages 15–49 for both MDHS and MLSFH. MDHS includes only rural sub-sample. Primary+ schooling = completed at least some primary schooling. T-tests for statistically significant differences between MDHS and MLSFH are significant at  $p < 0.05$  or higher for all categories except those labeled *ns* = not significant.

2010 MLSFH sample population is more likely married and has a larger number of children than the MDHS study population. The differential age distribution is an important factor contributing to these differences between the MLSFH and MDHS study populations. Despite these age differences, however, there are no marked differences in schooling levels between the MLSFH and MDHS study populations.

Because of the differential age distributions of the MDHS and MLSFH, Table A9 compares the characteristics of the MDHS and MLSFH study populations by age groups, and Table A10 provides a comparison between the MDHS and MLSFH study populations with the latter being reweighted to match the 2010 MDHS age distribution (separate by gender, restricted to ages 15–49). Controlling for the differential age distribution significantly reduces the differences between the MLSFH and MDHS study populations, with the MLSFH study population being somewhat more likely to be currently married and more likely to have been married more than once; fertility is also slightly higher in the MLSFH study population as compared to the MDHS. Once the differential age structures in the MDHS and MLSFH are controlled for, the remaining differences between the MDHS and MLSFH study populations tend to be relatively small, with the potential exception of marital status, where MLSFH respondents remain more likely to be married than MDHS respondents even after differences in the age distribution of these two surveys are accounted for. The higher likelihood of MLSFH respondents to be married, as compared to MDHS respondents, is likely due to the initial 1998 MLSFH sample that focused on ever-married women and their spouses and the fact that peri-urban regions are missing in the MLSFH (Appendix A2.1). Nevertheless, overall the re-

Table A9: 2010 MDHS and 2010 MLSFH sample characteristics, by age and gender

|                           | North |                     | Central |                    | South |                    | All Sites |                    |
|---------------------------|-------|---------------------|---------|--------------------|-------|--------------------|-----------|--------------------|
|                           | MDHS  | MLSFH               | MDHS    | MLSFH              | MDHS  | MLSFH              | MDHS      | MLSFH              |
| <b>Females</b>            |       |                     |         |                    |       |                    |           |                    |
| <b>Panel A: Age 20–29</b> |       |                     |         |                    |       |                    |           |                    |
| Primary+ schooling        | 97.9  | 99.5*               | 89.8    | 89.8 <sup>ns</sup> | 87.7  | 83.2 <sup>ns</sup> | 90.2      | 90.8 <sup>ns</sup> |
| Currently married         | 73.7  | 87.8***             | 72.1    | 85.6***            | 69.7  | 86.5***            | 71.3      | 86.6***            |
| Married > once            | 13.3  | 14.1 <sup>ns</sup>  | 14.0    | 18.8 <sup>ns</sup> | 22.3  | 29.2*              | 17.8      | 20.8 <sup>ns</sup> |
| # children ever born      | 2.4   | 2.2 <sup>ns</sup>   | 2.3     | 2.9***             | 2.6   | 2.9*               | 2.5       | 2.7**              |
| # living children         | 2.2   | 2.1 <sup>ns</sup>   | 2.1     | 2.4*               | 2.2   | 2.5 <sup>ns</sup>  | 2.2       | 2.3*               |
| <b>Panel B: Age 30–39</b> |       |                     |         |                    |       |                    |           |                    |
| Primary+ schooling        | 95.0  | 98.1*               | 72.7    | 82.0**             | 70.6  | 51.9***            | 75.6      | 77.5 <sup>ns</sup> |
| Currently married         | 74.0  | 86.9***             | 75.1    | 87.4***            | 69.7  | 90.5***            | 72.3      | 88.3***            |
| Married > once            | 22.5  | 19.0 <sup>ns</sup>  | 30.5    | 27.7 <sup>ns</sup> | 34.7  | 42.6 <sup>ns</sup> | 31.1      | 29.7 <sup>ns</sup> |
| # children ever born      | 5.0   | 4.9 <sup>ns</sup>   | 5.2     | 5.6**              | 4.9   | 5.7***             | 5.0       | 5.4***             |
| # living children         | 4.4   | 4.4 <sup>ns</sup>   | 4.3     | 4.6 <sup>ns</sup>  | 4.0   | 4.6***             | 4.2       | 4.5***             |
| <b>Panel C: Age 40–49</b> |       |                     |         |                    |       |                    |           |                    |
| Primary+ schooling        | 88.8  | 97.2***             | 60.3    | 65.8 <sup>ns</sup> | 55.0  | 35.0***            | 63.3      | 65.8 <sup>ns</sup> |
| Currently married         | 68.8  | 85.8***             | 70.0    | 76.7 <sup>ns</sup> | 64.7  | 79.6***            | 67.4      | 80.9***            |
| Married > once            | 25.9  | 26.2 <sup>ns</sup>  | 36.5    | 43.7 <sup>ns</sup> | 42.9  | 50.7 <sup>ns</sup> | 37.4      | 40.0 <sup>ns</sup> |
| # children ever born      | 6.5   | 6.7 <sup>ns</sup>   | 7.3     | 7.5 <sup>ns</sup>  | 6.3   | 6.7 <sup>ns</sup>  | 6.7       | 6.9 <sup>ns</sup>  |
| # living children         | 5.4   | 5.4 <sup>ns</sup>   | 5.6     | 5.4 <sup>ns</sup>  | 5.0   | 5.0 <sup>ns</sup>  | 5.3       | 5.2 <sup>ns</sup>  |
| <b>Males</b>              |       |                     |         |                    |       |                    |           |                    |
| <b>Panel A: Age 20–29</b> |       |                     |         |                    |       |                    |           |                    |
| Primary+ schooling        | 98.4  | 100.0*              | 94.7    | 96.8 <sup>ns</sup> | 94.2  | 87.8*              | 95.3      | 94.9 <sup>ns</sup> |
| Currently married         | 45.1  | 63.1***             | 50.7    | 67.5***            | 52.7  | 78.9***            | 50.4      | 69.8***            |
| Married > once            | 8.9   | 16.4 <sup>ns</sup>  | 13.2    | 22.4 <sup>ns</sup> | 16.4  | 30.7**             | 13.9      | 23.7***            |
| # children ever born      | 1.1   | 1.1 <sup>ns</sup>   | 1.1     | 1.5**              | 1.4   | 2.3***             | 1.3       | 1.7***             |
| # living children         | 1.0   | 1.0 <sup>ns</sup>   | 1.0     | 1.5***             | 1.3   | 1.9***             | 1.1       | 1.4***             |
| <b>Panel B: Age 30–39</b> |       |                     |         |                    |       |                    |           |                    |
| Primary+ schooling        | 96.8  | 98.98 <sup>ns</sup> | 88.4    | 87.5 <sup>ns</sup> | 89.0  | 84.2 <sup>ns</sup> | 90.1      | 90.6 <sup>ns</sup> |
| Currently married         | 72.1  | 89.8***             | 80.6    | 96.4***            | 81.2  | 98.7***            | 79.5      | 94.8***            |
| Married > once            | 28.6  | 46.88**             | 29.7    | 40.2*              | 36.8  | 41.9 <sup>ns</sup> | 32.9      | 42.9**             |
| # children ever born      | 4.2   | 4.1 <sup>ns</sup>   | 4.3     | 4.8*               | 4.4   | 4.7 <sup>ns</sup>  | 4.3       | 4.5 <sup>ns</sup>  |
| # living children         | 3.8   | 3.9 <sup>ns</sup>   | 3.7     | 3.9 <sup>ns</sup>  | 3.7   | 4.2 <sup>ns</sup>  | 3.7       | 4.0 <sup>ns</sup>  |
| <b>Panel C: Age 40–49</b> |       |                     |         |                    |       |                    |           |                    |
| Primary+ schooling        | 98.3  | 97.87 <sup>ns</sup> | 83.2    | 86.2 <sup>ns</sup> | 84.1  | 72.1*              | 86.5      | 85.8 <sup>ns</sup> |
| Currently married         | 82.8  | 93.6**              | 84.1    | 96.3***            | 80.1  | 92.9***            | 82.1      | 94.43***           |
| Married > once            | 34.7  | 44.7 <sup>ns</sup>  | 38.6    | 46.3 <sup>ns</sup> | 47.0  | 52.4 <sup>ns</sup> | 41.5      | 47.6 <sup>ns</sup> |
| # children ever born      | 6.6   | 7.0 <sup>ns</sup>   | 7.4     | 7.1 <sup>ns</sup>  | 6.7   | 6.9 <sup>ns</sup>  | 6.9       | 7.0 <sup>ns</sup>  |
| # living children         | 5.7   | 5.9 <sup>ns</sup>   | 6.1     | 5.9 <sup>ns</sup>  | 5.5   | 5.5 <sup>ns</sup>  | 5.8       | 5.8 <sup>ns</sup>  |

Notes: Primary+ schooling = completed at least some primary schooling. T-tests for statistically significant differences between MDHS and MLSFH \*\*\* $p < 0.001$ ; \*\* $p < 0.01$ ; \* $p < 0.05$ ;  $ns = p$  not significant. MDHS includes only rural subsample. MDHS sample sizes are 7,421 (females) and 1,916 (males) at age 20–29, 5,131 (females) and 1,494 (males) at age 30–39, and 3,042 (females) and 917 (males) at age 40–49. MLSFH sample sizes are 598 (females) and 430 (males) at age 20–29, 485 (females) and 286 (males) at age 30–39, and 404 (females) and 289 (males) at age 40–49.

**Table A10: 2010 MDHS and 2010 MLSFH sample characteristics, with MLSFH weighted to match MDHS age distribution**

|                      | Females |                    | Males |                    |
|----------------------|---------|--------------------|-------|--------------------|
|                      | MDHS    | MLSFH              | MDHS  | MLSFH              |
| Primary+ schooling   | 84.0    | 84.2 <sup>ns</sup> | 93.0  | 94.0 <sup>ns</sup> |
| Currently married    | 59.9    | 87.3               | 52.1  | 60.9               |
| Married > once       | 24.7    | 24.7 <sup>ns</sup> | 29.5  | 36.3               |
| # children ever born | 3.3     | 3.7                | 2.9   | 2.7 <sup>ns</sup>  |
| # living children    | 2.7     | 3.0                | 2.5   | 2.3 <sup>ns</sup>  |

*Notes:* Restricted to ages 15–49 for both MDHS and MLSFH, with MLSFH weighted to match MDHS age distribution (separately by gender). MDHS includes only rural subsample. Primary+ schooling = completed at least some primary schooling. T-tests for statistically significant differences between MDHS and MLSFH are significant at  $p < 0.05$  or higher for all categories except those labeled *ns* = not significant.

maining differences in sample characteristics are mostly not substantively significant and/or indicative of important distortions in the MLSFH study populations as compared to the nationally-representative MDHS rural sample.

In order to provide a comparison of the MLSFH with a representative sample that extends to older ages, Table A11 compares the 2010 MLSFH study population with the rural subsample of the 2010 Malawi Integrated Household Survey (IHS3), which is a nationally representative survey conducted by the Malawi National Statistical Office to monitor progress towards the Millennium Development Goals (MDGs). As already documented in the comparison with the MDHS, the MLSFH study population is more likely to be married than the nationally representative IHS3 study population (rural subsample), and the MDHS respondents have slightly more schooling. The differences in religion result from the fact that the MLSFH is based in only three regions, one of which (Balaka) is predominantly Muslim. MLSFH respondents also are less likely to reside in a house with a metal/tile roof, possibly related to the fact that peri-urban areas are included in the rural IHS3 sample, but not the MLSFH. The comparison with the IHS3 also provide information on health-related outcomes, which are of particular interest at somewhat older ages (age 45+), and both datasets reveal relatively high levels of disabilities at ages 45 and over. Overall, similar to our comparison with the DHS above, there are selected differences in several of the variables reported in Table A11 between the 2010 MLSFH and IHS3 study population, but overall these differences do not seem to be substantially significant and indicative of important biases/distortions in the MLSFH study population—and where they exist, they can be related to the specific study design of the MLSFH and controlled for analyses that aim at estimating population-level characteristics based on the MLSFH.

In summary, therefore, our comparisons of the 2010 MLSFH study population with the rural samples of the MDHS and IHS3 surveys reveal that the MLSFH

Table A11: 2010 IHS3 and 2010 MLSFH sample characteristics

| Age range                                            | 20–29      |       |              |       | 30–44      |       |              |       |
|------------------------------------------------------|------------|-------|--------------|-------|------------|-------|--------------|-------|
|                                                      | MLSFH 2010 |       | IHS3 2010–11 |       | MLSFH 2010 |       | IHS3 2010–11 |       |
|                                                      | N          | %     | N            | %     | N          | %     | N            | %     |
| <b>Demographic and Socioeconomic Characteristics</b> |            |       |              |       |            |       |              |       |
| Male                                                 | 435        | 41.3% | 3,228        | 45.7% | 454        | 39.0% | 3,289        | 50.0% |
| Any schooling                                        | 941        | 89.4% | 6,118        | 86.6% | 918        | 78.9% | 4,947        | 75.2% |
| Married                                              | 809        | 76.9% | 4,767        | 67.5% | 1,027      | 88.3% | 5,625        | 85.5% |
| Religion:Christian                                   | 612        | 58.2% | 6,047        | 85.6% | 728        | 62.6% | 5,518        | 83.9% |
| Muslim                                               | 218        | 20.7% | 778          | 11.0% | 200        | 17.2% | 732          | 11.1% |
| Other                                                | 222        | 21.1% | 238          | 3.4%  | 235        | 20.2% | 330          | 5.0%  |
| Metal/tile roof                                      | 158        | 15.0% | 1,806        | 25.6% | 248        | 21.3% | 1,913        | 29.1% |
| <b>Health Indicators</b>                             |            |       |              |       |            |       |              |       |
| Functional limitations and disability state          |            |       |              |       |            |       |              |       |
| Moderate Limitation                                  | 124        | 11.8% | –            | –     | 202        | 17.4% | –            | –     |
| Severe Limitation                                    | 24         | 2.3%  | –            | –     | 43         | 3.7%  | –            | –     |
| ADL disabled                                         | –          | –     | 350          | 5.0%  | –          | –     | 506          | 7.7%  |
| Average Age                                          | 24.7       |       | 24.3         |       | 36.8       |       | 35.8         |       |
| Total                                                | 1052       |       | 7,063        |       | 1163       |       | 6,580        |       |
| Age range                                            | 45–64      |       |              |       | 65+        |       |              |       |
|                                                      | MLSFH 2010 |       | IHS3 2010–11 |       | MLSFH 2010 |       | IHS3 2010–11 |       |
|                                                      | N          | %     | N            | %     | N          | %     | N            | %     |
| <b>Demographic and Socioeconomic Characteristics</b> |            |       |              |       |            |       |              |       |
| Male                                                 | 467        | 43.6% | 1,924        | 48.1% | 201        | 45.0% | 785          | 43.2% |
| Any schooling                                        | 729        | 68.0% | 2,483        | 62.1% | 263        | 58.8% | 745          | 41.0% |
| Married                                              | 850        | 79.3% | 3,071        | 76.8% | 255        | 57.0% | 914          | 50.3% |
| Religion:Christian                                   | 628        | 58.6% | 3,319        | 83.0% | 233        | 52.1% | 1,418        | 78.0% |
| Muslim                                               | 200        | 18.7% | 441          | 11.0% | 101        | 22.6% | 241          | 13.3% |
| Other                                                | 244        | 22.8% | 241          | 6.0%  | 113        | 25.3% | 158          | 8.7%  |
| Metal/tile roof                                      | 254        | 23.7% | 1,253        | 31.3% | 100        | 22.4% | 537          | 29.6% |
| <b>Health Indicators</b>                             |            |       |              |       |            |       |              |       |
| Functional limitations and disability state          |            |       |              |       |            |       |              |       |
| Moderate Limitation                                  | 314        | 29.3% | –            | –     | 176        | 39.4% | –            | –     |
| Severe Limitation                                    | 86         | 8.0%  | –            | –     | 113        | 25.3% | –            | –     |
| ADL disabled                                         | –          | –     | 783          | 19.6% | –          | –     | 895          | 49.3% |
| Average Age                                          | 53.5       |       | 53.1         |       | 74.1       |       | 74.5         |       |
| Total                                                | 1072       |       | 4,001        |       | 447        |       | 1,817        |       |

Notes: (a) IHS3 data description: The Integrated Household Survey is one of the primary instruments implemented by the Government of Malawi through the National Statistical Office (NSO) roughly every 5 years to monitor and evaluate the changing conditions of Malawian households. The IHS data have, among other insights, provided benchmark poverty and vulnerability indicators to foster evidence-based policy formulation and monitor the progress of meeting the Millennium Development Goals (MDGs) as well as the goals listed as part of the Malawi Growth and Development Strategy (MGDS). The Third Integrated Household Survey (IHS3) was conducted by National Statistical Office (NSO) in March 2010–March 2011.<sup>84</sup> A stratified two-stage sample design was used for the IHS3. The IHS3 sampling frame is based on the listing information and cartography from the 2008 Malawi Population and Housing Census (PHC); includes the three major regions of Malawi,

(Continued on next page)

**Table A11: 2010 IHS3 and 2010 MLSFH sample characteristics**

(Note to Table A11, continued from previous page)

namely North, Center and South; and is stratified into rural and urban strata. The rural subsample of the IHS3, which is used for the above analyses, includes residents from each of the 27 districts of Malawi, except those living in the urban centers of Lilongwe City, Blantyre City, Mzuzu City, and the Municipality of Zomba, and except for residents of the island of Likoma on Lake Malawi. The sampling frame excludes the population living in institutions, such as hospitals, prisons and military barracks. (b) Health indicators: There are no directly comparable disability/health indicators in the MLSFH and IHS3. Functional limitations and disability states for the MLSFH are defined as follows: respondents who answered “somewhat limited” on either of the two MLSFH SF-12 question about physical limitations are classified as *moderately limited*, and respondents who answered “limited a lot” on either question are classified as *severely limited*. ADL disabled in the IHS3 is defined as having difficulty in any one of the following five activities of daily living (ADLs): Seeing, hearing, walking, remembering/concentrating, self-care (bathing/dressing). (c) Comparisons between the IHS3 and the MLSFH are based on IHS3 and the MLSFH unweighted samples. IHS3 includes only rural subsample. All differences between the MLSFH and IHS3, except for the proportion with any schooling among 20–30 year olds, proportion with any schooling and proportion married for 30–45 year-olds, proportion married for 45–64 year olds, and proportion male 65+, are significant ( $p < .05$ ) according to chi-square tests. Source: Modified from Payne et al. (2013).<sup>45</sup>

study population continues to closely match the characteristics of nationally-representative cross-sectional surveys, despite the fact that the initial MLSFH sample was not selected to be nationally representative and the MLSFH has been subject to attrition over time (see below). Neither the initial sample selection that restricted the MLSFH to three rural region, nor the MLSFH attrition and enrollment of new MLSFH respondents over time, seem to have importantly affected the MLSFH in terms of its ability to represent the rural population of Malawi. The MLSFH is different from nationally-representative rural samples in terms of its age distribution, and where appropriate, the MLSFH can be weighted to match the age distribution of rural Malawi. The MLSFH also contains a larger fraction of respondents who are currently married, which is likely due to the initial 1998 MLSFH sample that focused on ever-married women and their spouses and the fact that peri-urban regions are missing in the MLSFH. Where appropriate, analyses can adjust for this over-representation of married individuals in the MLSFH.

#### **A5. Analyses of attrition in the MLSFH**

All longitudinal data collection projects face the inherent problem of sample attrition: the failure to find or reinterview individuals who were surveyed in an earlier wave of the study.<sup>49,85–89</sup> Attrition leads to decrease in sample sizes, which can reduce power in statistical analysis. More importantly, however, attrition may bias subsequent analyses if those who leave the sample are substantially and systematically different from those who do not—particularly on unobserved characteristics.<sup>49,85–89</sup> Numerous events can lead to sample attrition, including short- or long-term mobility, mortality, failures to recontact respondents in the absence of reliable addresses, or refusal of respondents to participate in follow-up waves of

the study. In rural sub-Saharan Africa, rates of attrition are often found to be relatively high due to high levels of mobility which is often work-related or related to marriage and/or divorce.<sup>2,49,90</sup> The MLSFH is no exception to this pattern (Figure 2 and Table A1), with the fraction of MLSFH respondents who were successfully reinterviewed at a subsequent MLSFH round ranging from 73.5% (in 2001) to 78.1% (in 2004); a outlier is the 2012 MLSFH, where 90.3% of eligible respondents from the 2010 MLSFH (age 45+ and interviewed in both the 2008 and 2010 MLSFH) were reinterviewed.

Earlier analyses of attrition in the MLSFH focused on attrition up to the 2006 MLSFH.<sup>31,50</sup> These analyses concluded that, even though respondent characteristics often differ significantly between those who were lost to follow-up and those who were re-interviewed and attrition was often predicted by key respondent characteristics, the coefficient estimates for standard family background variables in regressions and probit equations for the majority of the outcome variables were not affected significantly by attrition.

We update these earlier analyses of attrition in the MLSFH by focusing on attrition during 2006–10 and 2008–10, i.e., attrition among the most recent complete MLSFH surveys. Following our earlier analyses of attrition, after describing the primary reasons leading to a loss-to-follow-up in the MLSFH, we conduct three sets of analyses to assess concerns about attrition-related biases in the MLSFH. First, we compare observable characteristics of respondents who were interviewed by the MLSFH in an earlier but not in a subsequent wave, with the characteristics of respondents who were observed in both MLSFH waves. Second, to identify possible predictors of attrition, we report logistic regressions of the probability to attrit after a respondent was interviewed in the 2006 or 2008 MLSFH round. Finally, we perform a series of OLS and logistic regressions predicting several outcomes of interest from the 2006 and 2008 data, which are chosen based on their ability to reflect a broad range of topics investigated with the MLSFH. To assess if attrition potentially results in these estimated relationships, these regressions include interactions of explanatory variables with an indicator that a respondent attrited subsequent to the 2006 or 2008 MLSFH (this approach for investigating the potentially distorting effect of attrition is sometimes referred to as a BGLW test).<sup>87</sup>

We focus in our analyses on attrition of respondents who were interviewed as part of the 2006 or 2008 MLSFH, but were not successfully reinterviewed in the 2010 MLSFH. Table A12 reports the recorded reasons of why MLSFH respondents who were interviewed in 2006 or 2008 were not reinterviewed during the 2010 MLSFH (see also Figure 2, where the same information is reported with less detail). In the majority of cases, attrition is due to migration, which in most cases is related to work or marital transitions (marriage/divorce). Refusal rates in the MLSFH study remain remarkably low, and refusals are not a major source of attrition. And while mortality rates are relatively high in this rural SSA context, and MLSFH mortality levels are comparable to that of the general population,<sup>45,47,91</sup> mortality is also not a primary reason of why MLSFH respondents are lost to follow-up.

**Table A12: Reasons for attrition in 2010 MLSFH**

|                                                                                      | Reason (%) for attrition in 2010 among MLSFH respondents interviewed in |       |
|--------------------------------------------------------------------------------------|-------------------------------------------------------------------------|-------|
|                                                                                      | 2006                                                                    | 2008  |
| Refused 2010 MLSFH survey                                                            | 10.0                                                                    | 9.1   |
| Hospitalised at time of MLSFH survey                                                 | 0.1                                                                     | 0.4   |
| Deceased since prior MLSFH survey                                                    | 6.5                                                                     | 8.9   |
| Person unknown                                                                       | 4.9                                                                     | 9.1   |
| Temporarily absent at time of MLSFH survey                                           | 12.9                                                                    | 14.1  |
| Moved outside of MLSFH study village/region                                          | 45.9                                                                    | 42.6  |
| Other reasons                                                                        | 19.8                                                                    | 15.9  |
| Number of respondents lost to follow-up<br>(and thus <i>N</i> for above tabulations) | 970                                                                     | 1,016 |
| Number successfully interviewed (2006/2008)                                          | 3,431                                                                   | 4,036 |
| % lost to follow-up by 2010                                                          | 28.3                                                                    | 25.2  |

Tables A13 and A14 compare individual characteristics and selected key outcome variables for MLSFH respondents who have been interviewed in 2006 or 2008, but not in 2010 as a result of attrition. These descriptive comparisons are based on observed characteristics from the initial MLSFH wave (2006 or 2008 in our analyses) and, as expected, indicate some differences between respondents who were retained in the 2010 MLSFH and those who were lost to follow-up. Those who were not reinterviewed were more likely to be male, were somewhat younger and had fewer children, and were more likely from Balaka (where mobility is higher). Attriters don't differ markedly in education levels from those who were re-interviewed. And while attriters were less likely to agree to HTC, more likely to be HIV+ (conditional on being tested), and had more sexual partners (2006 only). There are no substantively-relevant differences between attriters and non-attriters in terms of SF12 physical or mental health scores, the ever-use of condoms, the worries about HIV or the subjective expectations of being HIV+ or becoming infected in the future. These patterns of differences between attriters and non-attriters are essentially confirmed in Tables A15 and A16, which report logistic regressions of the probability to attrit on 2006/08 individual characteristics and outcome variable. The first column in this table reports bivariate relationships between the indicated variables (measured at the initial MLSFH wave in 2006 or 2008) and attrition status by 2010. For attrition during 2006–10 and 2008–10, gender, age, region of residence, number of children, agreeing to HTC and being HIV+ are significantly associated with attrition; marital status and the subjective likelihood of being HIV+ are significantly associated with attrition during 2006–10 but not for the shorter time horizon 2008–10.

Finally, Tables A17 and A18 report regressions of selected outcome variables—SF12 physical and mental health score, number of sexual partners, being HIV-

Table A13: MLSFH attrition 2006–2010: 2006 descriptive statistics by attrition status in 2010

|                                                            | Interviewed |       | Attrited |       | Difference |         |         |
|------------------------------------------------------------|-------------|-------|----------|-------|------------|---------|---------|
|                                                            | Mean        | SD    | Mean     | SD    | Means      | t-value | p-value |
| <b>MLSFH 2010 survey outcome</b>                           |             |       |          |       |            |         |         |
| <b>Panel A: Key respondent characteristics (in 2006)</b>   |             |       |          |       |            |         |         |
| Male                                                       | 0.43        | 0.50  | 0.50     | 0.50  | -0.07      | -3.44   | 0.00    |
| Age                                                        | 35.73       | 13.50 | 33.47    | 13.76 | 2.26       | 4.36    | 0.00    |
| Currently married                                          | 0.84        | 0.37  | 0.74     | 0.44  | 0.10       | 6.46    | 0.00    |
| Number of living children                                  | 3.93        | 3.61  | 3.73     | 3.22  | 0.72       | 5.39    | 0.00    |
| Region: Mchinji (centre)                                   | 0.32        | 0.47  | 0.34     | 0.47  | -0.02      | -1.10   | 0.27    |
| Balaka (south)                                             | 0.33        | 0.47  | 0.38     | 0.48  | -0.05      | -2.64   | 0.01    |
| Rumphi (north)                                             | 0.35        | 0.48  | 0.28     | 0.45  | 0.07       | 3.76    | 0.00    |
| Schooling: No schooling                                    | 0.24        | 0.43  | 0.23     | 0.42  | 0.01       | 0.62    | 0.54    |
| Primary                                                    | 0.63        | 0.48  | 0.61     | 0.49  | 0.02       | 1.16    | 0.25    |
| Secondary or more                                          | 0.13        | 0.34  | 0.16     | 0.37  | -0.03      | -2.38   | 0.02    |
| Missing data on key respondent characteristics             | 0.00        | 0.05  | 0.02     | 0.13  | -0.01      | -4.42   | 0.00    |
| Observations (N)                                           | 2,461       | 71.7% | 970      | 28.3% |            |         |         |
| <b>Panel B: Key outcomes of interest (in 2006)</b>         |             |       |          |       |            |         |         |
| SF12: physical health score (2,205; 816)                   | 52.55       | 7.22  | 52.32    | 7.71  | 0.23       | 0.77    | 0.44    |
| SF12: mental health score (2,205; 816)                     | 55.64       | 7.91  | 55.44    | 8.07  | 0.20       | 0.62    | 0.53    |
| HIV test result available (2,454; 954)                     | 0.90        | 0.30  | 0.80     | 0.40  | 0.10       | 7.84    | 0.00    |
| HIV positive in 2006 (2,212; 766)                          | 0.05        | 0.21  | 0.10     | 0.30  | -0.06      | -5.60   | 0.00    |
| Ever used condom, with any of last 3 partners (1,987; 668) | 0.29        | 0.45  | 0.32     | 0.47  | -0.03      | -1.49   | 0.14    |
| Lifetime number of sexual partners (1,991; 671)            | 2.92        | 3.94  | 3.43     | 4.78  | -0.51      | -2.75   | 0.01    |
| HIV/AIDS worry (1,984; 672); Not at all                    | 0.58        | 0.49  | 0.55     | 0.50  | 0.03       | 1.43    | 0.15    |
| A little                                                   | 0.26        | 0.44  | 0.25     | 0.43  | 0.01       | 0.44    | 0.66    |
| A lot                                                      | 0.16        | 0.37  | 0.20     | 0.40  | -0.04      | -2.40   | 0.02    |
| Subj. likelihood of being HIV+ (2,059; 724): None          | 0.72        | 0.45  | 0.69     | 0.46  | 0.03       | 1.66    | 0.10    |
| Low                                                        | 0.19        | 0.40  | 0.20     | 0.40  | 0.00       | -0.11   | 0.91    |
| Medium                                                     | 0.05        | 0.22  | 0.06     | 0.24  | -0.01      | -1.14   | 0.25    |
| High                                                       | 0.03        | 0.18  | 0.05     | 0.22  | -0.02      | -2.39   | 0.02    |

Notes: Missing data on key respondent characteristics = 1 if one of the following variables has missing value in the data: age, currently married, number of living children, and schooling (there are no missing values for gender and region). In Panel B, the number of observations varies by outcome; Ns are reported in parentheses as (N reinterviewed; N attrited). HIV test result available = at least one HIV test result is available from 2004 and/or 2006 MLSFH; HIV+ = at least one of the available test results is positive.



Table A14: MLSFH attrition 2008–2010: 2008 descriptive statistics by attrition status in 2010

|                                                          | Interviewed |       | Attrited |       | Difference |         |         |
|----------------------------------------------------------|-------------|-------|----------|-------|------------|---------|---------|
|                                                          | Mean        | SD    | Mean     | SD    | Means      | t-value | p-value |
| <b>MLSFH 2010 survey outcome</b>                         |             |       |          |       |            |         |         |
| <b>Panel A: Key respondent characteristics (in 2008)</b> |             |       |          |       |            |         |         |
| Male                                                     | 0.40        | 0.49  | 0.45     | 0.50  | -0.05      | -2.88   | 0.00    |
| Age                                                      | 41.57       | 16.66 | 39.65    | 17.98 | 1.91       | 3.03    | 0.00    |
| Currently married                                        | 0.83        | 0.38  | 0.81     | 0.39  | 0.02       | 1.24    | 0.22    |
| Number of living children                                | 4.45        | 4.02  | 3.77     | 4.17  | 0.68       | 4.50    | 0.00    |
| Region: Mchinji (center)                                 | 0.32        | 0.47  | 0.37     | 0.48  | -0.05      | -2.96   | 0.00    |
| Balaka (south)                                           | 0.34        | 0.47  | 0.41     | 0.49  | -0.07      | -3.99   | 0.00    |
| Rumphi (north)                                           | 0.34        | 0.48  | 0.22     | 0.42  | 0.12       | 7.15    | 0.00    |
| Schooling: No schooling                                  | 0.25        | 0.43  | 0.24     | 0.43  | 0.01       | 0.60    | 0.55    |
| Primary                                                  | 0.62        | 0.48  | 0.62     | 0.49  | 0.01       | 0.32    | 0.75    |
| Secondary or more                                        | 0.12        | 0.33  | 0.14     | 0.35  | -0.02      | -1.24   | 0.22    |
| Missing data on key respondent characteristics           | 0.03        | 0.18  | 0.05     | 0.22  | -0.02      | -2.65   | 0.01    |
| Observations (N)                                         | 3,020       | 74.8% | 1,016    | 25.2% |            |         |         |
| <b>Panel B: Key outcomes of interest (in 2008)</b>       |             |       |          |       |            |         |         |
| SF12: physical health score (2,427; 558)                 | 51.84       | 8.45  | 51.39    | 8.02  | 0.46       | 1.16    | 0.24    |
| SF12: mental health score (2,427; 558)                   | 54.10       | 9.00  | 54.26    | 8.81  | -0.16      | -0.37   | 0.71    |
| HIV test result available (2,923; 965)                   | 0.88        | 0.32  | 0.71     | 0.46  | 0.18       | 13.32   | 0.00    |
| HIV positive in 2008 (2,586; 683)                        | 0.05        | 0.22  | 0.08     | 0.27  | -0.03      | -3.09   | 0.00    |
| Lifetime number of sexual partners (2,573; 837)          | 3.24        | 4.75  | 3.23     | 3.06  | 0.01       | 0.05    | 0.96    |
| HIV/AIDS worry (2,907; 955): Not at all                  | 0.51        | 0.50  | 0.53     | 0.50  | -0.03      | -1.37   | 0.17    |
| A little                                                 | 0.24        | 0.43  | 0.25     | 0.43  | 0.00       | -0.18   | 0.86    |
| A lot                                                    | 0.25        | 0.43  | 0.22     | 0.42  | 0.03       | 1.78    | 0.08    |
| Subj. likelihood of being HIV+ (2,862; 944): None        | 0.53        | 0.50  | 0.51     | 0.50  | 0.02       | 0.87    | 0.38    |
| Low                                                      | 0.30        | 0.46  | 0.30     | 0.46  | 0.00       | -0.10   | 0.92    |
| Medium                                                   | 0.11        | 0.31  | 0.13     | 0.34  | -0.02      | -1.68   | 0.09    |
| High                                                     | 0.06        | 0.24  | 0.06     | 0.23  | 0.01       | 0.62    | 0.53    |

Notes: Missing data on key respondent characteristics = 1 if one of the following variables has missing value in the data: age, currently married, number of living children, and schooling (there are no missing values for gender and region). In Panel B, the number of observations varies by outcome; Ns are reported in parentheses as (N reinterviewed; N attrited). HIV test result available = at least one HIV test result is available from 2004, 2006 and/or 2008 MLSFH; HIV+ = at least one of the available test results is positive.

**Table A15: MLSFH attrition 2006–2010: Logistic regressions predicting attrition in 2010 among respondents interviewed in 2006 (Odds ratios)**

|                                               | uni-                | Multivariate analyses |                     |                     |                     |                     |                     |     |
|-----------------------------------------------|---------------------|-----------------------|---------------------|---------------------|---------------------|---------------------|---------------------|-----|
|                                               | variate             | (1)                   | (2)                 | (3)                 | (4)                 | (5)                 | (6)                 | (7) |
| Missing data                                  | 5.880***<br>(2.674) |                       |                     |                     |                     |                     |                     |     |
| Male                                          | 1.285***<br>(0.098) | 1.300**<br>(0.104)    | 1.265**<br>(0.102)  | 1.519***<br>(0.160) | 1.500***<br>(0.161) | 1.607***<br>(0.172) | 1.573***<br>(0.171) |     |
| Age                                           | 0.988***<br>(0.003) | 0.988***<br>(0.003)   | 0.997<br>(0.004)    | 0.989**<br>(0.004)  | 0.992<br>(0.004)    | 0.993<br>(0.005)    | 0.996<br>(0.005)    |     |
| Region ( <i>Mchinji</i> )                     |                     |                       |                     |                     |                     |                     |                     |     |
| <i>Balaka</i>                                 | 1.066<br>(0.097)    | 1.105<br>(0.104)      | 1.078<br>(0.102)    | 1.132<br>(0.127)    | 1.015<br>(0.117)    | 1.111<br>(0.126)    | 0.998<br>(0.115)    |     |
| <i>Rumphi</i>                                 | 0.749**<br>(0.071)  | 0.709***<br>(0.072)   | 0.687***<br>(0.071) | 0.667**<br>(0.085)  | 0.670**<br>(0.086)  | 0.672**<br>(0.086)  | 0.672**<br>(0.087)  |     |
| Schooling ( <i>No schooling</i> )             |                     |                       |                     |                     |                     |                     |                     |     |
| <i>Primary</i>                                | 1.008<br>(0.093)    | 1.019<br>(0.105)      | 1.047<br>(0.108)    | 0.982<br>(0.116)    | 0.964<br>(0.116)    | 0.993<br>(0.118)    | 0.974<br>(0.118)    |     |
| <i>Secondary+</i>                             | 1.292*<br>(0.163)   | 1.361*<br>(0.206)     | 1.285<br>(0.196)    | 1.163<br>(0.225)    | 1.112<br>(0.218)    | 1.138<br>(0.221)    | 1.094<br>(0.215)    |     |
| # of living children                          | 0.930***<br>(0.012) |                       | 0.964*<br>(0.015)   |                     |                     | 0.966*<br>(0.017)   | 0.972<br>(0.017)    |     |
| Currently married                             | 0.558***<br>(0.051) |                       | 0.645***<br>(0.065) |                     |                     | 0.619**<br>(0.099)  | 0.646**<br>(0.105)  |     |
| SF12: physical health                         | 0.996<br>(0.005)    |                       |                     | 0.993<br>(0.006)    | 0.993<br>(0.007)    | 0.993<br>(0.006)    | 0.993<br>(0.007)    |     |
| SF12: mental health                           | 0.997<br>(0.005)    |                       |                     | 0.996<br>(0.006)    | 0.996<br>(0.006)    | 0.997<br>(0.006)    | 0.997<br>(0.006)    |     |
| Ever used condom, with any of last 3 partners | 1.146<br>(0.110)    |                       |                     | 1.057<br>(0.112)    | 1.075<br>(0.117)    | 1.065<br>(0.114)    | 1.086<br>(0.118)    |     |
| Lifetime number of sexual partners            | 1.026*<br>(0.011)   |                       |                     | 1.008<br>(0.011)    | 1.007<br>(0.011)    | 1.008<br>(0.011)    | 1.006<br>(0.011)    |     |
| HIV / AIDS worry                              | 1.129*<br>(0.065)   |                       |                     | 0.978<br>(0.073)    | 0.974<br>(0.074)    | 0.978<br>(0.074)    | 0.976<br>(0.075)    |     |
| Subj. likelihood of being HIV+                | 1.154*<br>(0.065)   |                       |                     | 1.161*<br>(0.086)   | 1.109<br>(0.084)    | 1.159*<br>(0.086)   | 1.110<br>(0.085)    |     |
| HIV+                                          | 2.355***<br>(0.365) |                       |                     |                     | 2.564***<br>(0.449) |                     | 2.402***<br>(0.424) |     |
| HIV test result available                     | 0.426***<br>(0.044) |                       |                     |                     | 0.388***<br>(0.052) |                     | 0.389***<br>(0.053) |     |
| Observations                                  |                     | 3,413                 | 3,408               | 2,604               | 2,604               | 2,600               | 2,600               |     |

*Notes:* Odds ratios are reported. Constant is omitted. (1) = univariate logistic regressions of attrition in 2010 in variables listed in the respective row. (2-7) = multivariate logistic regressions of attrition in 2010, with various specifications. Reference groups are stated in parentheses. Std errors in parentheses. Respondents with at least one HIV-positive MLSFH HIV test during 2004–2006 are considered as being HIV positive, all others are considered being HIV negative at the 2006 MLSFH Round (MLSFH 4). HIV / AIDS worry is coded as: 0 = not at all, 1 = a little, and 2 = a lot. Subjective likelihood of being HIV+ (at the time of the MLSFH survey) is coded as: 0 = none, 1 = low, 2 = medium and 3 = high. HIV+ status is as compared to HIV- in column 1 and as compared to HIV- or not tested in columns 5 and 7, with HIV test result available reflecting the effect of participation in HTC. *p*-values: \*\*\* *p* < 0.001, \*\* *p* < 0.01, \* *p* < 0.05.

positive, condom use, worries about HIV and subjective HIV infection probability—on individual characteristics (measured in 2006 or 2008), including an interaction of all included characteristics with an indicator for attrition in the 2010 MLSFH. If the estimated relationships for these outcome variables differ between MLSFH respondents who are retained in the sample and those who are lost to follow-up, the

**Table A16: MLSFH attrition 2008–2010: Logistic regressions predicting attrition in 2010 among respondents interviewed in 2008 (Odds ratios)**

|                                    | uni-                | Multivariate analyses |                     |                     |                     |                     |                     |
|------------------------------------|---------------------|-----------------------|---------------------|---------------------|---------------------|---------------------|---------------------|
|                                    | variate             | (2)                   | (3)                 | (4)                 | (5)                 | (6)                 | (7)                 |
|                                    | (1)                 |                       |                     |                     |                     |                     |                     |
| Missing data                       | 1.593**<br>(0.282)  |                       |                     |                     |                     |                     |                     |
| Male                               | 1.236**<br>(0.090)  | 1.202*<br>(0.095)     | 1.239**<br>(0.099)  | 1.337*<br>(0.156)   | 1.367**<br>(0.161)  | 1.298*<br>(0.152)   | 1.327*<br>(0.157)   |
| Age                                | 0.994**<br>(0.002)  | 0.995*<br>(0.002)     | 0.999<br>(0.003)    | 0.981***<br>(0.004) | 0.980***<br>(0.004) | 0.991<br>(0.005)    | 0.990<br>(0.005)    |
| Region ( <i>Mchinji</i> )          |                     |                       |                     |                     |                     |                     |                     |
| <i>Balaka</i>                      | 1.057<br>(0.088)    | 1.098<br>(0.097)      | 1.066<br>(0.095)    | 0.921<br>(0.114)    | 0.866<br>(0.108)    | 0.890<br>(0.111)    | 0.842<br>(0.106)    |
| <i>Rumphi</i>                      | 0.543***<br>(0.052) | 0.508***<br>(0.052)   | 0.508***<br>(0.052) | 0.454***<br>(0.066) | 0.452***<br>(0.066) | 0.452***<br>(0.066) | 0.450***<br>(0.066) |
| Schooling ( <i>No schooling</i> )  |                     |                       |                     |                     |                     |                     |                     |
| <i>Primary</i>                     | 1.029<br>(0.091)    | 1.151<br>(0.116)      | 1.162<br>(0.118)    | 1.351*<br>(0.202)   | 1.392*<br>(0.210)   | 1.336<br>(0.201)    | 1.379*<br>(0.209)   |
| <i>Secondary+</i>                  | 1.164<br>(0.146)    | 1.520**<br>(0.233)    | 1.429*<br>(0.221)   | 1.593*<br>(0.347)   | 1.605*<br>(0.351)   | 1.437<br>(0.318)    | 1.458<br>(0.324)    |
| # of living children               | 0.935***<br>(0.013) |                       | 0.945***<br>(0.015) |                     |                     | 0.926**<br>(0.025)  | 0.926**<br>(0.026)  |
| Currently married                  | 0.894<br>(0.084)    |                       | 0.906<br>(0.092)    |                     |                     | 0.802<br>(0.116)    | 0.824<br>(0.120)    |
| SF12: physical health              | 0.994<br>(0.006)    |                       |                     | 0.991<br>(0.008)    | 0.992<br>(0.008)    | 0.992<br>(0.008)    | 0.993<br>(0.008)    |
| SF12: mental health                | 1.001<br>(0.005)    |                       |                     | 0.996<br>(0.006)    | 0.996<br>(0.006)    | 0.997<br>(0.006)    | 0.997<br>(0.007)    |
| Lifetime number of sexual partners | 1.001<br>(0.009)    |                       |                     | 0.988<br>(0.014)    | 0.986<br>(0.015)    | 0.991<br>(0.014)    | 0.989<br>(0.014)    |
| HIV/AIDS worry                     | 0.928<br>(0.042)    |                       |                     | 0.973<br>(0.073)    | 0.978<br>(0.073)    | 0.974<br>(0.073)    | 0.979<br>(0.074)    |
| Subj. likelihood of being HIV+     | 1.033<br>(0.043)    |                       |                     | 1.025<br>(0.066)    | 0.983<br>(0.064)    | 1.023<br>(0.066)    | 0.983<br>(0.065)    |
| HIV+                               | 1.857***<br>(0.294) |                       |                     |                     | 2.010***<br>(0.398) |                     | 1.879**<br>(0.377)  |
| HIV test result available          | 0.306***<br>(0.027) |                       |                     |                     | 0.416***<br>(0.101) |                     | 0.420***<br>(0.102) |
| Observations                       |                     | 3,900                 | 3,888               | 2,591               | 2,591               | 2,584               | 2,584               |

Notes: Odds ratios are reported. Constant is omitted. (1) = univariate logistic regressions of attrition in 2010 in variables listed in the respective row. (2-7) = multivariate logistic regressions of attrition in 2010, with various specifications. Reference groups are stated in parentheses. Std errors in parentheses. Respondents with at least one HIV-positive MLSFH HIV test during 2004–2008 are considered as being HIV positive, all others are considered being HIV negative at the 2008 MLSFH Round (MLSFH 5). HIV/AIDS worry is coded as: 0 = not at all, 1 = a little, and 2 = a lot. Subjective likelihood of being HIV+ (at the time of the MLSFH survey) is coded as: 0 = none, 1 = low, 2 = medium and 3 = high. HIV+ status is as compared to HIV- in column 1 and as compared to HIV- or not tested in columns 5 and 7, with HIV test result available reflecting the effect of participation in HTC. *p*-values: \*\*\* *p* < 0.001, \*\* *p* < 0.01, \* *p* < 0.05.

interaction effects with attrition would be individually or jointly significant (this is referred to as the BGLW test for selective attrition<sup>87</sup>). In Tables A17 and A18 we therefore report the interaction effects with attrition for all individual characteristics included in the regressions (main effects are omitted), and tests for the individual and joint significance of the interaction effects.

Very few of the individual interactions are statistically significant. For the ma-

**Table A17: MLSFH attrition 2006–2010: OLS, ordered logit, and logit models for selected key outcome variables in 2006, with interaction for respondents who subsequently attrited during 2006–10**

|                                                                                 | SF12<br>mental<br>health<br>score<br>OLS<br>(1) | SF12<br>physical<br>health<br>score<br>OLS<br>(2) | Lifetime<br>number<br>of sexual<br>partners<br>OLS<br>(3) | HIV<br>positive<br>Logit<br>(4) | Used<br>condom<br>with<br>recent<br>partners<br>Logit<br>(5) | HIV/<br>AIDS<br>worry<br>Ordered<br>logit<br>(6) | Subj.<br>likeli-<br>hood of<br>being<br>HIV+<br>Ordered<br>logit<br>(7) |
|---------------------------------------------------------------------------------|-------------------------------------------------|---------------------------------------------------|-----------------------------------------------------------|---------------------------------|--------------------------------------------------------------|--------------------------------------------------|-------------------------------------------------------------------------|
| <i>Interactions with attrition:</i>                                             |                                                 |                                                   |                                                           |                                 |                                                              |                                                  |                                                                         |
| Male × attri-<br>tion                                                           | 0.195<br>(0.669)                                | -0.096<br>(0.612)                                 | 0.020<br>(0.380)                                          | -0.323<br>(0.352)               | 0.092<br>(0.234)                                             | 0.144<br>(0.192)                                 | -0.237<br>(0.219)                                                       |
| Age × attri-<br>tion                                                            | 0.013<br>(0.031)                                | -0.048<br>(0.028)                                 | 0.041**<br>(0.016)                                        | 0.012<br>(0.013)                | -0.014<br>(0.012)                                            | -0.002<br>(0.008)                                | 0.011<br>(0.009)                                                        |
| Region ( <i>Mchinji</i> )                                                       |                                                 |                                                   |                                                           |                                 |                                                              |                                                  |                                                                         |
| <i>Rumphi</i> × attri-<br>tion                                                  | 1.206<br>(0.861)                                | 0.161<br>(0.788)                                  | -0.085<br>(0.476)                                         | -0.024<br>(0.439)               | 0.152<br>(0.283)                                             | 0.454<br>(0.243)                                 | -0.088<br>(0.266)                                                       |
| <i>Balaka</i> × attri-<br>tion                                                  | -0.392<br>(0.794)                               | 0.898<br>(0.726)                                  | 0.566<br>(0.428)                                          | 0.353<br>(0.387)                | 0.097<br>(0.264)                                             | -0.200<br>(0.214)                                | -0.200<br>(0.238)                                                       |
| Schooling ( <i>No schooling</i> )                                               |                                                 |                                                   |                                                           |                                 |                                                              |                                                  |                                                                         |
| <i>Primary</i> × attri-<br>tion                                                 | -2.276**<br>(0.865)                             | -0.271<br>(0.791)                                 | 0.784<br>(0.455)                                          | -0.273<br>(0.412)               | 0.339<br>(0.299)                                             | -0.536*<br>(0.223)                               | 0.174<br>(0.254)                                                        |
| <i>Secondary</i> × attri-<br>tion                                               | -3.102*<br>(1.252)                              | -0.917<br>(1.145)                                 | 0.337<br>(0.734)                                          | -0.018<br>(0.673)               | 0.053<br>(0.435)                                             | -1.149**<br>(0.388)                              | 0.056<br>(0.425)                                                        |
| Children × attri-<br>tion                                                       | 0.015<br>(0.124)                                | 0.160<br>(0.113)                                  | -0.159*<br>(0.063)                                        | -0.015<br>(0.063)               | 0.006<br>(0.040)                                             | -0.011<br>(0.032)                                | 0.016<br>(0.035)                                                        |
| Married × attri-<br>tion                                                        | -1.844*<br>(0.848)                              | -0.395<br>(0.776)                                 | 0.759<br>(0.599)                                          | 0.596<br>(0.402)                | -0.160<br>(0.384)                                            | 0.004<br>(0.297)                                 | 0.198<br>(0.307)                                                        |
| Attrition (effect<br>on constant)                                               | 2.045<br>(1.392)                                | 0.902<br>(1.273)                                  | -2.106*<br>(0.904)                                        | 0.165<br>(0.691)                | 0.310<br>(0.579)                                             | 0.579<br>(0.449)                                 | -0.352<br>(0.491)                                                       |
| Observations ( <i>N</i> )                                                       | 3,021                                           | 3,021                                             | 2,662                                                     | 2,978                           | 2,655                                                        | 2,656                                            | 2,642                                                                   |
| <i>χ<sup>2</sup>-tests (F-tests for OLS) for joint effects of attrition on:</i> |                                                 |                                                   |                                                           |                                 |                                                              |                                                  |                                                                         |
| Constants only                                                                  | 2.16<br>[0.142]                                 | 0.50<br>[0.479]                                   | 5.43*<br>[0.020]                                          | 0.06<br>[0.811]                 | 0.29<br>[0.593]                                              | 1.66<br>[0.198]                                  | 0.51<br>[0.474]                                                         |
| Coefficients only                                                               | 1.84<br>[0.066]                                 | 0.85<br>[0.55]                                    | 1.84<br>[0.066]                                           | 7.50<br>[0.483]                 | 4.04<br>[0.854]                                              | 11.84<br>[0.158]                                 | 5.10<br>[0.747]                                                         |
| Constants and<br>coefficients                                                   | 1.82<br>[0.060]                                 | 1.04<br>[0.40]                                    | 1.77<br>[0.069]                                           | 38.66***<br>[0.000]             | 4.94<br>[0.839]                                              | 14.27<br>[0.113]                                 | 10.33<br>[0.324]                                                        |

Notes: Results of OLS/logit regressions of different outcomes on key individual characteristics, all measured in 2008, with all coefficients interacted with an indicator for subsequent attrition during 2008–10. Only interaction effects are shown, first-order effects are not reported. Standard errors are in round parentheses. Constants and cut-points (for ordered logit models) are not reported. Children = # of living children. Married = currently married. Reference categories: HIV/AIDS worries: *not at all*; Subjective likelihood of being HIV+: *none*. Numbers in brackets [ ] represent *p*-values for  $\chi^2$ -tests or *F*-tests. *p*-values: \*\*\* *p* < 0.001, \*\* *p* < 0.01, \* *p* < 0.05.

majority of outcomes considered in Tables A17 and A18, including SF12 physical health score, being HIV-positive, condom use and worries about HIV, the null-hypotheses that the interactions effects with attrition are jointly zero for all included coefficients is not rejected. For attrition during 2006–10 (Table A17), this is also the case for subjective HIV infection probability. The estimated relationships (coefficients) seem to differ between attriters and non-attriters for none of the outcome variables when attrition during 2006–10 is considered (Table A17), and it differs only for the subjective HIV infection probability when attrition during

**Table A18: MLSFH attrition 2008–2010: OLS, ordered logit, and logit models for selected key outcome variables in 2008, with interaction for respondents who subsequently attrited during 2008–10**

|                                                                                 | SF12<br>mental<br>health<br>score | SF12<br>physical<br>health<br>score | Lifetime<br>number<br>of sexual<br>partners | HIV<br>positive    | HIV/<br>AIDS<br>worry | Subj.<br>likelihood<br>of being<br>HIV+ |
|---------------------------------------------------------------------------------|-----------------------------------|-------------------------------------|---------------------------------------------|--------------------|-----------------------|-----------------------------------------|
|                                                                                 | OLS                               | OLS                                 | OLS                                         | Logit              | Ordered<br>logit      | Ordered<br>logit                        |
|                                                                                 | (1)                               | (2)                                 | (3)                                         | (4)                | (5)                   | (6)                                     |
| <i>Interactions with attrition:</i>                                             |                                   |                                     |                                             |                    |                       |                                         |
| Male × attrition                                                                | 0.943<br>(0.860)                  | 1.470<br>(0.777)                    | -0.696*<br>(0.348)                          | -0.814*<br>(0.398) | 0.177<br>(0.154)      | 0.420**<br>(0.152)                      |
| Age × attrition                                                                 | 0.010<br>(0.030)                  | -0.038<br>(0.027)                   | 0.000<br>(0.016)                            | -0.003<br>(0.014)  | -0.004<br>(0.006)     | -0.004<br>(0.006)                       |
| Region ( <i>Mchinji</i> )                                                       |                                   |                                     |                                             |                    |                       |                                         |
| <i>Rumphu</i> × attrition                                                       | 1.129<br>(1.086)                  | -0.961<br>(0.982)                   | 0.478<br>(0.456)                            | 0.602<br>(0.479)   | 0.141<br>(0.201)      | 0.243<br>(0.201)                        |
| <i>Balaka</i> × attrition                                                       | 0.318<br>(0.984)                  | -0.584<br>(0.889)                   | 0.163<br>(0.397)                            | 0.394<br>(0.430)   | 0.065<br>(0.176)      | 0.165<br>(0.172)                        |
| Schooling ( <i>No schooling</i> )                                               |                                   |                                     |                                             |                    |                       |                                         |
| <i>Primary</i> × attrition                                                      | -2.226<br>(1.136)                 | -0.844<br>(1.027)                   | -0.410<br>(0.464)                           | -0.355<br>(0.457)  | 0.140<br>(0.198)      | 0.060<br>(0.197)                        |
| <i>Secondary</i> × attrition                                                    | -3.818*<br>(1.706)                | -1.674<br>(1.542)                   | -0.501<br>(0.663)                           | 0.301<br>(0.674)   | -0.025<br>(0.293)     | 0.400<br>(0.291)                        |
| Children × attrition                                                            | 0.013<br>(0.187)                  | 0.220<br>(0.169)                    | 0.071<br>(0.081)                            | 0.071<br>(0.078)   | 0.043<br>(0.032)      | -0.012<br>(0.032)                       |
| Married × attrition                                                             | 1.042<br>(1.080)                  | -0.819<br>(0.976)                   | 0.329<br>(0.475)                            | 0.944*<br>(0.425)  | -0.020<br>(0.205)     | 0.088<br>(0.206)                        |
| Attrition (effect on<br>constant)                                               | -0.211<br>(1.874)                 | 1.381<br>(1.694)                    | -0.226<br>(0.807)                           | -0.284<br>(0.803)  | -0.222<br>(0.347)     | -0.207<br>(0.349)                       |
| Observations ( <i>N</i> )                                                       | 2,982                             | 2,982                               | 3,408                                       | 3,265              | 3,857                 | 3,800                                   |
| <i>χ<sup>2</sup>-tests (F-tests for OLS) for joint effects of attrition on:</i> |                                   |                                     |                                             |                    |                       |                                         |
| Constants only                                                                  | 0.01<br>[0.910]                   | 0.66<br>[0.415]                     | 0.08<br>[0.780]                             | 0.12<br>[0.724]    | 0.41<br>[0.522]       | 0.35<br>[0.552]                         |
| Coefficients only                                                               | 1.28<br>[0.251]                   | 1.00<br>[0.431]                     | 1.11<br>[0.350]                             | 13.29<br>[0.102]   | 5.37<br>[0.718]       | 17.33*<br>[0.027]                       |
| Constants and coefficients                                                      | 1.13<br>[0.334]                   | 1.16<br>[0.320]                     | 1.09<br>[0.364]                             | 24.43**<br>[0.004] | 5.45<br>[0.793]       | 18.09*<br>[0.034]                       |

*Notes:* Results of OLS/logit regressions of different outcomes on key individual characteristics, all measured in 2008, with all coefficients interacted with an indicator for subsequent attrition during 2008–10. Only interaction effects are shown, first-order effects are not reported. Standard errors are in round parentheses. Constants and cut-points (for ordered logit models) are not reported. Children = # of living children. Married = currently married. Reference categories: HIV/AIDS worries: *not at all*; Subjective likelihood of being HIV+: *none*. Numbers in brackets [ ] represent *p*-values for  $\chi^2$ -tests or *F*-tests. *p*-values: \*\*\* *p* < 0.001, \*\* *p* < 0.01, \* *p* < 0.05.

2008–10 is considered (Table A18).

In summary, therefore, our analyses of MLSFH attrition during 2006–10 (Tables A13, A15 and A17) and during 2008–10 (Tables A14, A16 and A18) confirm our earlier findings. MLSFH respondents who are lost to follow-up differ significantly in important observed characteristics—including gender, age, region of residence, number of children and HIV status—from those who are retained in the MLSFH; however, and perhaps contrary to expectations, several key outcome measures—including SF12 physical and mental health, lifetime number of sexual partners,

condom use, HIV status, HIV worries and risk perceptions—do not seem to be substantially different between attriters and non-attriters. While attrition is therefore predicted by several individual characteristics and outcome variables, the coefficient estimates in relationships between key outcome variables and individual characteristics are not necessarily affected by attrition. Specifically, for the majority of outcomes in Tables A17 and A18, the null-hypothesis that the estimated coefficients in these relationships are identical for attriters and non-attriters is not rejected. For SF12 physical health score, SF12 mental health score, HIV-positive status, number of sexual partners, condom use and worries about HIV this null hypothesis is not rejected when either longer-term attrition during 2006–10 or shorter-term attrition during 2008–10 are considered. In none of the outcomes in Tables A17–A18 is the null-hypothesis rejected for both shorter- and longer-term attrition.

The analyses of attrition reported here therefore confirm our previous findings that, while attrition in the MLSFH is substantial and predicted by several observable characteristics, attrition does not necessarily bias the coefficients of estimated relationships. Thus, the attrition levels observed in the MLSFH may not necessarily represent a general problem for obtaining consistent estimates of the coefficients of interest for most of these outcomes. These results, which are very similar to those documented in other contexts,<sup>49,85,92</sup> suggest that multivariate estimates of behavioral relations may not be biased due to attrition and thus support the collection of longitudinal data. And while the attrition analyses reported here do not substitute for analyses of the potential biases caused by attrition in the context of specific MLSFH research projects, the results reported here substantially alleviate concerns about attrition-related biases in the MLSFH. Despite this conclusion, however, the MLSFH has made efforts to re-contact and re-interview respondents who were lost to follow-up. The 2007 MLSFH Migration Follow-up (Appendix A2.2) has previously traced and interviewed MLSFH respondents who attrited in 2006, and a more recent migration follow-up project in 2013 traced and reinterviewed MLSFH respondents who attrited in 2010. This follow-up found a large number of MLSFH respondents who have been lost to follow-up as a substantial proportion of the migration leading to attrition is relatively local or to a small set of destinations: based on the migrant tracking information collected in 2013 ( $N \approx 1,150$ ), 64% of ever-interviewed MLSFH respondents who were lost-to-follow-up in 2010 remained within the same district, while 12% had moved to one of Malawi's four largest cities, and 24% had moved to another rural/peri-urban area. The forthcoming availability of this 2013 migration follow-up will further reduce the concerns about attrition in the MLSFH, as well as enable more detailed analyses of the processes leading to migration and attrition.

#### **A6. Specific features of the MLSFH data and study design**

In the subsequent sections, we provide detailed information about some specific features of the MLSFH data and the MLSFH study design that have been relevant to a broad set of MLSFH analyses.

**Figure A5: Name generator for ego-centric conversational networks**

Next, I'd like to ask you some questions about people you've chatted with about AIDS

|                                                                                                                                                                                                                                                                                                                     |                                                                                                     |
|---------------------------------------------------------------------------------------------------------------------------------------------------------------------------------------------------------------------------------------------------------------------------------------------------------------------|-----------------------------------------------------------------------------------------------------|
| <p><b>A23a</b> How many people have you chatted with about AIDS? I mean people other than your husband or partner.</p> <p><b>IF LESS THAN FOUR ARE NAMED, PROBE:</b><br/>"Can you think of anyone else? How about sitting in on a conversation, even if you yourself didn't say anything?"</p>                      | <p>Total number named.....[ _____ ]</p> <p>If none are named <u>after probing</u>, skip to A39a</p> |
| <p><b>A23b</b> Could you please give me the names of four of these? As I said earlier, this information will be completely confidential. You can also make up names, if you feel more comfortable.</p> <p><b>WRITE THE FOUR NAMES, AND START ASKING THE QUESTIONS BELOW FOR EACH PARTNER NAMED ON THE RIGHT</b></p> | <p>NAME:</p> <p>#1. _____</p> <p>#2. _____</p> <p>#3. _____</p> <p>#4. _____</p>                    |

Fill in the names for A24 as follows. Check the  box after each task.

- a.  Copy the first name listed on LINE #1 in A23b to column "NWP #1" in Question A24
- b.  Copy the names on LINES #2, #3 and #4 in A23b to columns "NWP #2", "NWP #3", "NWP #4" in Question A24
- c.  Copy the names in A24 to the first row of the continuation pages of the below table with questions A24a to A38d Keep the same sequence of names.

Starting with NWP#1, column by column, ask questions A24a to A38d for the persons listed under NWP#1, NWP#2, NWP#3 and NPW#4

| Question                              | Code   | NWP #1 | NWP #2 | NWP #3 | NWP #4 |
|---------------------------------------|--------|--------|--------|--------|--------|
| <b>A24</b> NAME (copy name from A23b) |        |        |        |        |        |
| <b>A24a</b> Is [NAME] male or female? | Male   | 1      | 1      | 1      | 1      |
|                                       | Female | 2      | 2      | 2      | 2      |

*Questionnaire social network module continues*

*Notes:* For ego-centric conversational networks about HIV/AIDS from 2006 MLSFH questionnaire; the identical name generator was used during the MLSFH 1998–2006. A corresponding data were also collected for conversational networks about family planning (MLSFH 1998–2001) and for religion (MLSFH 2004)

### **A6.1. Social network data in the MLSFH**

A unique aspect of the MLSFH is the inclusion of longitudinal data on social networks that measure women's and men's social interactions about family planning or the HIV/AIDS epidemic.<sup>7–9,19,93–97</sup> In particular, the data include information on egocentric networks, that is, networks that contain the respondent and network partners with whom the respondent had chatted about family planning (MLSFH Rounds 1998 and 2001) or HIV/AIDS (MLSFH Rounds 1998, 2001, 2004 and 2006), with detailed information on up to four network partners. The name generator for these ego-centric conversational networks is shown in Figure A5. This MLSFH questionnaire module on social networks began by first asking the respondents about how many people they had chatted with about these respective topics, where the term "chat" was used to indicate informal conversations rather than lectures at clinics. Names (or nick-names of up to four network partners were recorded. Subsequent questions then asked for each of these named conversational network partners a set of questions, including about (i) characteristics of the network part-

ner (gender, age, location of residence, schooling, religion, marital status, wealth), (ii) characteristics of the relationship between the respondent and the network partner (familial relationship to respondent, closeness of the relationship, frequency of contact, etc.), and the content of the respondent's conversations with the network partner (for instance, in the context of HIV/AIDS-related conversational networks: the network partner's stated level of worries about HIV/AIDS and his/her subjective infection probability, the network partner's perceptions about infidelity about his/her spouse, etc.; in the context of family-planning-related networks: the network partners reported use of family planning methods and the spousal approval of this use). The specific question regarding the risk perception of the network partners, for example, was phrased as "How worried is *name of network partner* about getting AIDS?" with the same response categories as for the respondent (no risk, moderate risk, great risk). In addition, the MLSFH also asked respondents about the relationship among each of the nominated network partners to facilitate the calculation of network densities and related measures to describe the structure of the conversational networks, which can be important for identifying the mechanisms through which social interactions affect individual behaviors.<sup>98</sup> For illustration of these data on conversational networks in the MLSFH, selected descriptive statistics for the network about HIV/AIDS conversation in the 1998 and 2001 MLSFH are reported in Table A19.

#### **A6.2. Household/family rosters in the MLSFH**

An innovation of the 2006 data collection, which was continued in the 2008, 2010 and 2012 MLSFH waves, was the expansion of data on family structure and financial/non-financial transfers that is collected as part of the MLSFH. Specifically, starting in 2006, the MLSFH household and family roster included not only all individuals who currently live in the household as frequently done in other studies, but it also asked information about all parents and children independent of their survival and resident status (Table A20), including selected demographic, socioeconomic characteristics and information about the household/family members health as known to/perceived by the respondent (Table A21).

For all persons listed on the MLSFH household/family roster who were above age 15 and alive at the time of the survey (or had died within less than two years prior to the survey), the MLSFH asked a set of questions about transfers given to and received from the respondent. Since the quantitative measurement of transfers in contexts such as Malawi is inherently difficult, the MLSFH did not attempt to monetize the financial and non-financial transfers between respondents and their children or parents. Instead, for all alive parents and children above age 15, MLSFH respondents were asked a set of questions about financial and non-financial assistance during the last two years, including: (i) "In the past two years, have you given [name] any money or financial assistance?", with responses ranging from: 0 = no; 1 = yes, a little; 2 = yes, some; and 3 = yes, a lot; (ii) "In the past two years, have you given [name] any non-financial help? This could include help that takes time like collecting firewood, cooking, taking care of people, or helping with farming.", with responses



**Table A19: Summary of MLSFH HIV/AIDS conversational networks 1998–2001**

|                                                                             | Females        |                | Males           |                 |
|-----------------------------------------------------------------------------|----------------|----------------|-----------------|-----------------|
|                                                                             | 1998           | 2001           | 1998            | 2001            |
| <i>Characteristics of respondents with HIV/AIDS conversational networks</i> |                |                |                 |                 |
| N                                                                           | 1,179          | 1,159          | 806             | 799             |
| Age                                                                         | 31.1<br>(9.26) | 34.3<br>(9.39) | 37.0<br>(10.43) | 40.4<br>(10.96) |
| Not Married                                                                 | 0.11           | 0.11           | 0.01            | 0.03            |
| Children ever born                                                          | 4.38<br>(3.05) | 5.11<br>(2.89) | 5.28<br>(4.20)  | 6.17<br>(3.98)  |
| Perceived AIDS risk, respondent                                             |                |                |                 |                 |
| Proportion perceiving no risk                                               | 0.17           | 0.29           | 0.27            | 0.42            |
| Proportion perceiving moderate risk                                         | 0.21           | 0.23           | 0.19            | 0.21            |
| Proportion perceiving great risk                                            | 0.61           | 0.47           | 0.53            | 0.37            |
| <i>Descriptive statistics for HIV/AIDS conversational network</i>           |                |                |                 |                 |
| Prop. with at least one nwp in AIDS network                                 | 0.83           | 0.95           | 0.92            | 0.97            |
| Uncensored size of AIDS network                                             | 4.33<br>(5.14) | 5.84<br>(5.57) | 6.24<br>(6.46)  | 7.04<br>(6.92)  |
| Censored size of AIDS network                                               | 2.53<br>(1.50) | 3.42<br>(1.09) | 3.08<br>(1.26)  | 3.56<br>(0.95)  |
| Proportion with more than 4 network partners                                | 0.28           | 0.42           | 0.43            | 0.49            |
| Prop. with at least one nwp who perceives great AIDS risk                   | 0.61           | 0.52           | 0.67            | 0.47            |
| Number of nwp who perceive great risk                                       | 1.46<br>(1.49) | 1.06<br>(1.28) | 1.77<br>(1.59)  | 1.05<br>(1.35)  |
| Prop. with at least one nwp who perceives moderate AIDS risk                | 0.31           | 0.45           | 0.32            | 0.43            |
| Number of nwp who perceive moderate AIDS risk                               | 0.50<br>(0.87) | 0.71<br>(0.95) | 0.54<br>(0.94)  | 0.71<br>(1.03)  |
| Proportion with at least one nwp who perceives no AIDS risk                 | 0.26           | 0.57           | 0.30            | 0.58            |
| Number of nwp who perceive no AIDS risk                                     | 0.48<br>(0.94) | 1.12<br>(1.23) | 0.68<br>(1.20)  | 1.24<br>(1.32)  |

Notes: 'nwp(s)' = network partner(s). Uncensored size of the network is the mean response to the question about the number of network partners (Question A23a in Figure A5), and the uncensored network size is the mean number of network partners that were listed with name (censored at four) (Question A23b in Figure A5).

Source: Kohler et al.<sup>7</sup>

ranging from 0 = no; 1 = yes, once; 2 = yes, several times a year; 3 = yes, at least once a month; 4 = yes, at least once a week; and 5 = Yes, daily; (iii) "In the past two years, has [name] given you any money or financial assistance?", with responses ranging from: 0 = no; 1 = yes, a little; 2 = yes, some; and 3 = yes, a lot; and (iv) "In the past two years, has [name] given you any non-financial help? This could include help that takes time like collecting firewood, cooking, taking care of people, or helping with farming.",

**Table A20: Categories of individuals included in the MLSFH Household/family roster from 2008 onward**

---

Individuals listed in MLSFH Household/family roster

---

1. List the respondent
2. List name of spouse(s) of respondent. If respondent is not currently married, list name of most recently deceased or divorced spouse. For polygamous men: list all wives. If never married proceed to instruction 3, below.
3. List name of respondents parents (list names even if parents are deceased)
4. [if R is married or widowed] List name of spouses parents (list names even if parents are deceased; for polygamous men: list parents of all wives)
5. List the names of all children of the respondent (children ever born; include children who are no longer alive or do not live in respondents household)
6. List the names of any other children who usually live in this household (including non-biological children, grandchildren, nieces & nephews).
7. List the names of all other persons who slept in this household last night
8. List the names of all other persons who usually sleep in this household, but did not last night
9. List the names of all non-related children who are under your care but not living in the household (for example, anyone you have helped with school fees in the last 5 years).

---

with responses ranging from 0 = no; 1 = yes, once; 2 = yes, several times per year; 3 = yes, at least once a month; 4 = yes, at least once per week; and 5 = yes, daily.

To illustrate these data, Figure A6 shows net financial and non-financial trans-

**Table A21: Socioeconomic and health information reported by MLSFH respondent for each individual included in the MLSFH Household/family roster (from 2008 onward)**

---

Information about each person listed on the MLSFH household/family roster

---

|        |                                                                                                                                   |
|--------|-----------------------------------------------------------------------------------------------------------------------------------|
| Q2     | What is [name's] relationship to you?                                                                                             |
| Q3     | Is [name] male or female?                                                                                                         |
| Q4     | Is [name] alive? If [name] is dead, when did he/she die? ( <i>Note: Questions Q5–16 were not asked for persons who had died</i> ) |
| Q5     | How old is [name]? Or, in what year was [name] born?                                                                              |
| Q6     | Where does [name] usually live?                                                                                                   |
| Q7     | Did [name] sleep here last night?                                                                                                 |
| Q8     | If a person does not regularly live here: when did [name] move to this place?                                                     |
| Q9     | Has [name] been ill in the past 12 months? If yes, for how long?                                                                  |
| Q10    | How would you rate [name's] health in general?                                                                                    |
| Q11    | How would you compare [name's] health to other people in your village who are the same age and sex?                               |
| Q12    | What is [name's] current marital status?                                                                                          |
| Q13–14 | What is the highest level of schooling name completed? How many grades (in years) did [name] complete at that level?              |
| Q15    | If age > 10: What is [name's] main way of earning money?                                                                          |

---

Figure A6: Net financial/non-financial transfers to living adult children (LAC)

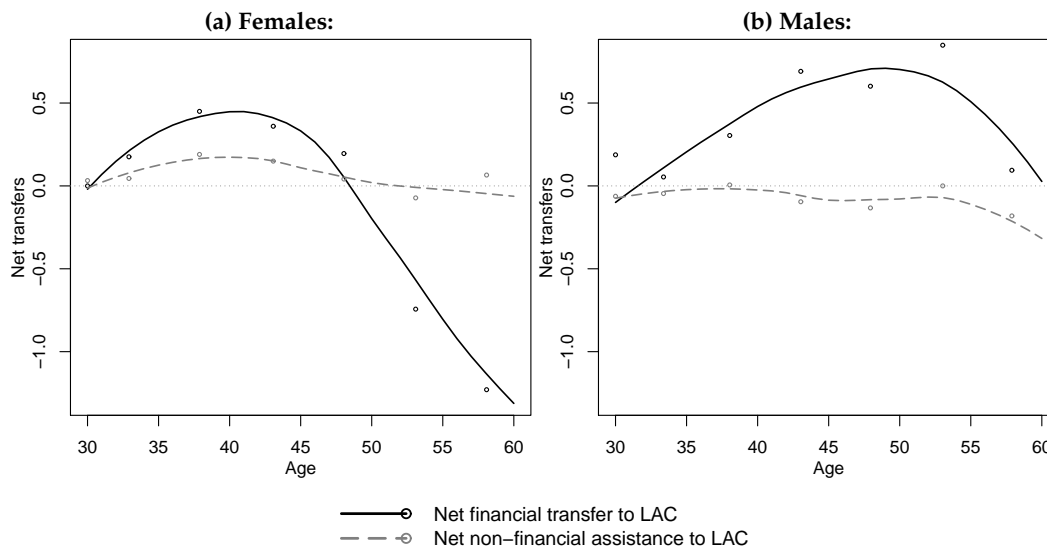

LAC = living adult children. Net financial and non-financial transfers are calculated based on transfers given/received during 2-years prior to the 2008 MLSFH. Positive values indicate a transfer from respondents to their children, and negative values indicate transfers from children to the respondents. For non-financial transfers, the Figure shows that, despite the fact that there is considerable mutual non-financial exchange between parents and their children, the *net* resource flows as a result of these non-financial transfers seem to be relatively small and there is *no* marked age pattern for either male or female respondents. In contrast, net resource flows as a result of financial transfers between respondents and their living adult children follow a marked age-pattern that indicates important differences in the flow of resources between respondents and their children across the life course. Around age 30, the net transfers to living adult children are very small because respondents tend to have a very small number of living adult children. At somewhat older ages, for both male and female respondents, net financial transfers towards children rise. In contrast to female respondents, adult children remain recipients of net financial transfers from male respondents until about respondent's age of 60.

Source: Kohler et al (2012).<sup>11</sup>

fers that were estimated based on the 2008 MLSFH family and household rosters. These financial and non-financial transfers in familial social networks were an important resource for individuals and families to ameliorate the implications of the HIV/AIDS epidemic.<sup>11-14</sup> However, while these transfers were widespread and a key characteristic of family relationships, contrary to expectations, intergenerational wealth flows did not always differ by kinship systems (matriliney or patriliney), nor were they generally related to health status. This is particularly surprising since the HIV/AIDS epidemic increased uncertainty among individuals about their current and future health status and their survival, and as a consequence, one would expect that the high disease-risk environment prevailing in rural Malawi and other SSA contexts would have affected transfer motivations and behavior among family members.<sup>11</sup> The transfers were, however, importantly con-

strained by the availability of transfer partners (parents or adult children), which were strongly age-patterned and often affected by (AIDS-related) mortality.

For persons who were reported as having died during the previous two years on the MLSFH household/family roster, the MLSFH also asked more detailed information about when the death occurred, how old the person was when he/she died, the level of schooling and the marital status of the diseased person, the health prior to the dying, and the likelihood (as perceived by the respondent) that the death was due to AIDS. There were also questions about health care and funeral costs incurred by the respondent in connection with the death of the person.

The 2008 and 2010 MLSFH also asked respondents to list up to 10 persons whom they would ask for assistance during a crisis (e.g., famine, health problems or other events that may lead to economic shortages in the household). The respondent was then asked a set of questions about basic demographic/socioeconomic characteristics of each listed person, followed by a set of questions about financial and non-financial transfers that the respondent had given to and/or received from each of the listed persons.

### **A6.3. Probabilistic expectation data in the MLSFH**

Since 2006, the MLSFH has included a module eliciting *probabilistic expectations*, that is, expectations that are measured on a well-defined numerical scale, are comparable across domains, and can be consistently interpreted as probabilities. These expectations data cover domains such as own and village-level mortality risks, risk of becoming infected with HIV during a single intercourse, and respondent's perception about being infected with HIV, and have proven useful for uncovering how respondents in rural Malawi perceive HIV and mortality risk, how they respond to new information about their HIV status, and how perceptions about HIV affect risk-taking behaviors.<sup>20–22,34,35,99,100</sup> In Figure A8, for example, we illustrate respondents' subjective probability of dying within a 5-year time period (by gender, region and age group), and related analyses have shown that these survival expectations are importantly related to HIV risk taking and sexual behaviors.

In order to elicit probabilistic expectations in the relatively low literacy and numeracy context of rural Malawi, the MLSFH developed an interactive elicitation technique that relied on asking respondents to allocate up to ten beans on a plate to express the likelihood that an event will be realized (Figure A7).<sup>20</sup> This bean format has the advantage of being visual, relatively intuitive and fairly engaging for respondents, and can be designed to improve the consistency of answers. Following an introductory text and example (Figure A7), respondents were first asked a training question about the probability of winning in a local board game (Bawo), followed by a question about the likelihood of a newborn baby dying before his first birthday. To evaluate whether respondents understand the concept of probability, respondents were then asked about two *nested* events: going to the market within (a) *two days*, and (b) *two weeks*. If respondents understand the concept of probability, they should provide an answer for the two-week period that is greater than or equal to the one of the two-day period. Interviewers were instructed to

Figure A7: 2006 MLSFH questionnaire module about subjective expectations

**INTERVIEWER:** Put the plate and the cup side by side. Recount the number of beans and check that you have 10 beans in the cup [\_\_\_]. As you provide the explanation below, add the beans into the plate to illustrate what you say.

“I will ask you several questions about the chance or likelihood that certain events are going to happen. There are 10 beans in the cup. I would like you to choose some beans out of these 10 beans and put them in the plate to express what you think the likelihood or chance is of a specific event happening. One bean represents one chance out of 10. If you do not put any beans in the plate, it means you are sure that the event will NOT happen. As you add beans, it means that you think the likelihood that the event happens increases. For example, if you put one or two beans, it means you think the event is not likely to happen but it is still possible. If you pick 5 beans, it means that it is just as likely it happens as it does not happen (fifty-fifty). If you pick 6 beans, it means the event is slightly more likely to happen than not to happen. If you put 10 beans in the plate, it means you are sure the event will happen. There is no right or wrong answer, I just want to know what you think.

Let me give you an example. Imagine that we are playing Bawo. Say, when asked about the chance that you will win, you put 7 beans in the plate. This means that you believe you would win 7 out of 10 games on average if we play for a long time.

**INTERVIEWER:** Report for each question the NUMBER OF BEANS put in the PLATE. After each question, replace the beans in the cup (unless otherwise noted).

For questions X1a to X1f: If respondent puts 10 (or 0) beans, prompt “Are you sure that this event will almost surely (not) happen?” CIRCLE 1 in column P if you prompted the respondent, and report the final answer only.

| X1                                                                    | Pick the number of beans that reflects how likely you think it is that...                                                                                                                                                                                                                                                          | # of beans in plate | Prompt for 0 or 10? |
|-----------------------------------------------------------------------|------------------------------------------------------------------------------------------------------------------------------------------------------------------------------------------------------------------------------------------------------------------------------------------------------------------------------------|---------------------|---------------------|
| a)                                                                    | <i>you will win if we play a game of Bawo after this interview</i>                                                                                                                                                                                                                                                                 | [___]               | 1                   |
| b)                                                                    | <i>a baby born in your community this month will die within one year</i>                                                                                                                                                                                                                                                           | [___]               | 1                   |
| c)                                                                    | <i>you will go to the market at least once <u>within the next 2 days</u></i><br>(LEAVE BEANS IN PLATE)                                                                                                                                                                                                                             | [___]               | 1                   |
| d)                                                                    | <i>you will go to the market at least once <u>within the next 2 weeks?</u></i>                                                                                                                                                                                                                                                     | [___]               | 1                   |
| <b>INTERVIEWER: Did Respondent add any beans between X1c and X1d?</b> |                                                                                                                                                                                                                                                                                                                                    | <b>If yes → X1f</b> |                     |
| e)                                                                    | <i>Remember, as time goes by, you may find more time to go to the market. Therefore, you should have added beans to the plate. Let me ask you again. Now, add beans in the plate so that the number of beans in the plate reflects how likely you think it is that you will go the market at least once <u>within 2 weeks?</u></i> | [___]               | 1                   |
| f)                                                                    | <i>you will experience shortage of food in the next 12 months?</i>                                                                                                                                                                                                                                                                 | [___]               | 1                   |

*Continued on next page*

leave the number of beans on the plate after the respondents had responded to the likelihood of going to the market within two days, thereby ensuring that s/he remembered the answer when answering about the two-week period in the next question. If the respondent violated the monotonicity property, the interviewer was instructed to explain the incoherency of the answers by stating that: “*as time goes by, you may find more time to go to the market. Therefore, you should have added beans to the plate.*” And the respondent was invited to reformulate the answer. For this first set of training questions, the interviewers were also instructed to prompt the respondent if s/he allocated 0 or 10 beans in the plate.

Respondents were then asked a set of questions related to economic outcomes, health outcomes, and risk-prevention strategies (Figure A7), including: (a) going to

Figure A7: 2006 MLSFH questionnaire module about subjective expectations

Continued from previous page

**For the subsequent questions, no longer prompt for “0” and “10” answers**

| X2 Pick the number of beans that reflects how likely you think it is that...                                                                   | # of beans<br>in plate |
|------------------------------------------------------------------------------------------------------------------------------------------------|------------------------|
| a) you will have to rely on family members for financial assistance in the next 12 months                                                      | [ ]                    |
| b) you are infected with HIV/AIDS now                                                                                                          | [ ]                    |
| <b>FOR MARRIED RESPONDENTS (INTERVIEWER: If respondent is not married → X2f)</b>                                                               |                        |
| c) your spouse is infected with HIV/AIDS now                                                                                                   | [ ]                    |
| d) you will use condom the next time you have sex with your spouse                                                                             | [ ]                    |
| e) you will use condom the next time you have sex with someone else other than your spouse<br>(INTERVIEWER: if sex only with spouse, write 99) | [ ]<br>→ X3            |
| <b>FOR UNMARRIED RESPONDENTS</b>                                                                                                               |                        |
| f) your romantic partner is infected with HIV/AIDS now<br>(INTERVIEWER: if no romantic partner, write 99 and → X2h)                            | [ ]                    |
| g) you will use condom the next time you have sex with your romantic partner<br>(INTERVIEWER: if no romantic partner, write 99)                | [ ]                    |
| h) you will use condom the next time you have sex with someone you just met<br>(INTERVIEWER: if no sex with someone just met, write 99)        | [ ]                    |
| i) you will be married one year from now                                                                                                       | [ ]                    |

Finally, I would like to ask you to consider the likelihood that **you** may not be alive as time goes by. We hope that nothing bad will happen to you, but nevertheless, something unfortunate may occur over the next years despite all precautions that you may take. If you don't want to, you do not need to answer this question.

INTERVIEWER: If respondent refuses to answer, skip to X8.

|                                                                                                                                                                   | # OF<br>BEANS<br>in plate |
|-------------------------------------------------------------------------------------------------------------------------------------------------------------------|---------------------------|
| X6 Pick the number of beans that reflects how likely you think it is that you will die within a <u>one-year</u> period beginning today.<br>(LEAVE BEANS ON PLATE) | [ ]<br>if 10 → X8         |
| X7 Put additional beans so that the number of beans in the plate reflects how likely you think it is that <u>you</u> ...                                          |                           |
| a) will die within a <u>five-year</u> period beginning today<br>(LEAVE BEANS ON PLATE; IT IS POSSIBLE TO ADD ZERO ADDITIONAL BEANS)                               | [ ]<br>if 10 → X8         |
| b) will die within a <u>ten-year</u> period beginning today<br>(IT IS POSSIBLE TO ADD ZERO ADDITIONAL BEANS. PUT BEANS BACK IN CUP AFTER RECORDING THE ANSWER)    | [ ]                       |

market within the next 2 days; (b) going to the market within the next 2 weeks; (c) experiencing a food shortage within the next 12 months; (d) having to rely on family members for financial assistance in the next 12 months; (e) being infected with HIV now; (f) using condom at the next sexual encounter with a spouse; (g) using condom at the next sexual encounter with someone other than spouse (not asked if respondent reports sex only with spouse); and (h) the respondent dying within (i) 1 year; (i) 5 years; and (ii) 10 years. The mortality questions were designed to ensure that respondents provided answers that would allow us to construct well-defined

survival curves. In particular, respondents were first asked to pick the number of beans that reflects how likely it is that they will die within a one-year period beginning today. Then, with the beans of the previous question still on the plate, they were asked to *add* more beans to reflect how likely it is that they would die within a five-year period. The same procedure was followed for the ten-year period mortality question. This ensured that respondents provided weakly increasing answers when the time horizon increased.

The MLSFH expectation module was implemented in 2006, 2008, 2010 and 2012 (with only minor changes in the content over time), providing up to four observations over seven years of detailed subjective expectations data in the MLSFH. For example, Figure A8 reports respondents subjective probability of dying within a 5-year time period based on the 2006 MLSFH probabilistic expectations. A detailed evaluation of the subjective probability module in the MLSFH concluded that the reported expectations were remarkably consistent with a basic property of probability theory (the monotonicity of nested events), and vary in meaningful ways with individual or contextual characteristics. In addition, respondents had relatively well-calibrated beliefs about infant mortality, but were greatly pessimistic about their own survival—perhaps as an overreaction to the substantial increases in adult mortality that have occurred as a result of HIV/AIDS in the last decade.<sup>20</sup> As an illustration of these data, Table A22 reports from the 2006 MLSFH the responses in terms of number of beans to the questions about going to the market, experiencing a food shortage, having to rely on family members, infant mortality, being infected with HIV, condom use, and mortality.<sup>20</sup> The implied subjective probabilities in this table were calculated by assuming that each number of beans between zero and ten corresponds to a specific probability interval between zero and one. This approach assumes that respondents choose the number of beans that best represents their subjective probability, and it reflects our beliefs that all respondents who place zero (ten) beans on the plate do not believe literally that this event has a probability of zero (one). Specifically, one plausible approach to assigning probabilities to each allocation of bean is as follows, which was also how the implied subjective probability  $P_i$  in Table A22 have been calculated:  $P_i < 0.05$  for *zero* beans,  $0.05 \leq P_i < 0.15$  for *one* bean, ...,  $\frac{X_i}{10} - 0.05 \leq P_i < \frac{X_i}{10} + 0.05$  for  $X_i$  beans, ...,  $0.85 \leq P_i < 0.95$  for *nine* beans, and  $P_i \geq 0.95$  for *ten* beans, where  $X_i$  is the number of beans allocated by respondent  $i$  given his/her underlying subjective probability  $P_i$ .

To illustrate the correspondence of subjective probabilities in the MLSFH with the commonly asked verbal scales, Table A23 also compares respondents' answers to the question, "In your opinion, what is the likelihood (chance) that you are infected with HIV/AIDS now?" with the number of beans provided when asked how likely do you think it is that you are infected with HIV/AIDS now. It shows that respondents who provided a higher likelihood of being infected using the verbal scale were also more likely to provide a higher number of beans. For example, the modal answer is 0 beans among respondents who said "no likelihood",

Figure A8: Subjective probability of dying within a 5-year time period based on MLSFH probabilistic expectations

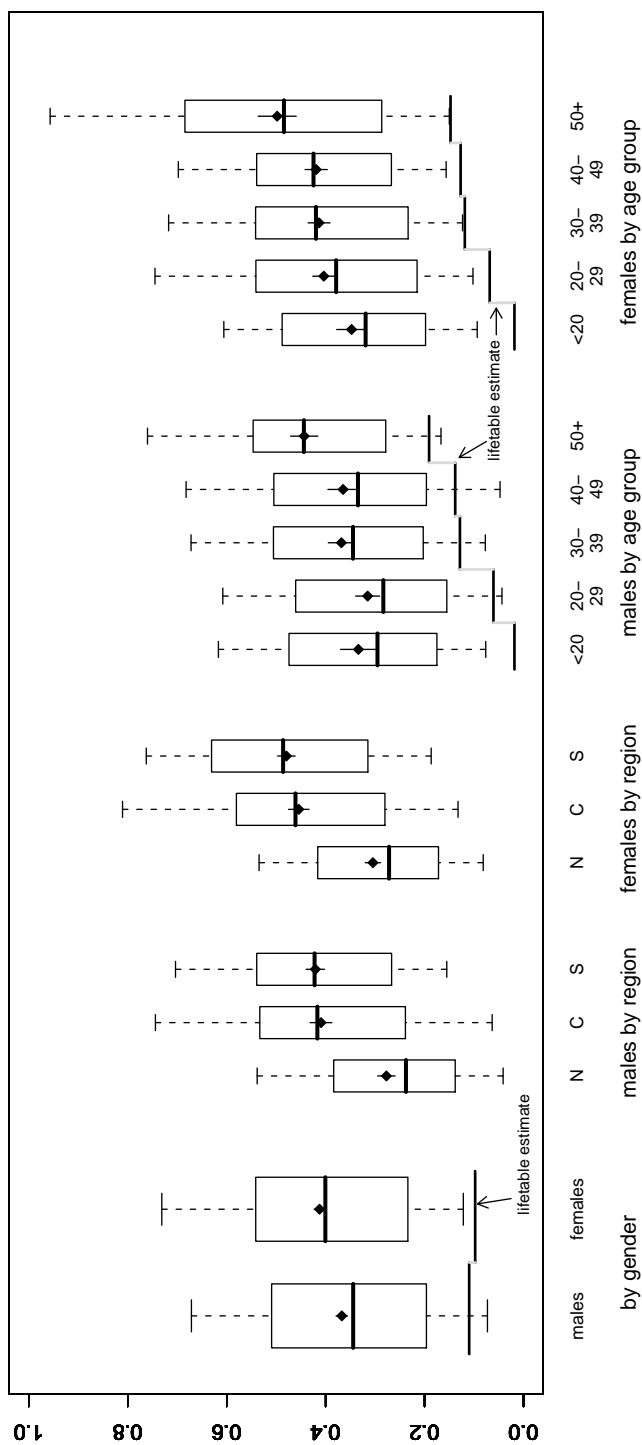

Notes: This boxplot-like graph displays the mean (dot) and median (center line) of the reported expectations, as well as the 10<sup>th</sup> (lower whisker), 25<sup>th</sup> (bottom of box), 75<sup>th</sup> (top of box), and 90<sup>th</sup> (upper whisker) percentiles of the distribution. Region is coded as: N = North (Rumphii), C = Center (Mchinji), S = South (Balaka). The key finding of the analyses is that both men and women in rural Malawi substantially overestimated their mortality risk, and they were much more pessimistic regarding their own survival as is warranted given current estimates of actual mortality rates. Across all ages in the sample, the median perceived 5-year mortality risk exceeded the corresponding lifetable estimate by a factor of 3.2 for males and 4.1 for females. The “bias” was the most severe for younger respondents, where the median five-year mortality probability reported by 15–19 year olds which was 16–17 times greater than the lifetable estimate. The discrepancy between life table estimates and subjective mortality expectations, however, decreased with age: above age 30, for men the median subjective probability of dying exceeded the corresponding lifetable estimate by a factor of 2.5–2.7 (5-year period) and 1.7–2.1 (10-year period); for women, the overestimation of mortality risk above age 30 was by a factor of 3.2–3.5. Despite this general overestimation, however, respondents mortality perceptions correctly reflected regional differences and age-gradients in mortality.

Source: Delavane and Kohler (2009).<sup>20</sup>



Table A22: Subjective probabilities of various common events in the 2006 MLSFH

| # beans                        | implied subj. prob. | Going to the market within |         | Experiencing food shortage next 12 months | Rely on family for financial assistance next 12 months | Baby dying before first b'day | Being infected with HIV now | Using condom at next sexual encounter with |                   | Own Mortality: Probability of dying within |       |        |
|--------------------------------|---------------------|----------------------------|---------|-------------------------------------------|--------------------------------------------------------|-------------------------------|-----------------------------|--------------------------------------------|-------------------|--------------------------------------------|-------|--------|
|                                |                     | two days                   | two wks |                                           |                                                        |                               |                             | spouse                                     | other than spouse | 1-yr                                       | 5-yrs | 10-yrs |
| 0                              | 0 to .05            | 6.0                        | 1.1     | 11.2                                      | 22.2                                                   | 18.4                          | 66.7                        | 64.3                                       | 10.1              | 29.1                                       | 6.0   | 2.0    |
| 1                              | .05 to .15          | 9.6                        | 1.3     | 7.7                                       | 11.7                                                   | 22.4                          | 9.6                         | 7.5                                        | 1.5               | 24.2                                       | 8.4   | 2.0    |
| 2                              | .15 to .25          | 17.7                       | 2.5     | 10.2                                      | 11.9                                                   | 17.7                          | 7.5                         | 6.7                                        | 3.8               | 16.2                                       | 16.2  | 4.9    |
| 3                              | .25 to .35          | 15.0                       | 6.3     | 8.9                                       | 8.6                                                    | 10.7                          | 4.8                         | 4.4                                        | 3.6               | 8.9                                        | 16.6  | 8.0    |
| 4                              | .35 to .45          | 14.6                       | 7.0     | 9.2                                       | 6.8                                                    | 7.3                           | 2.3                         | 2.9                                        | 3.4               | 5.4                                        | 12.2  | 10.0   |
| 5                              | .45 to .55          | 14.5                       | 12.4    | 17.3                                      | 13.2                                                   | 17.6                          | 5.6                         | 6.1                                        | 11.2              | 13.2                                       | 20.2  | 24.9   |
| 6                              | .55 to .65          | 7.9                        | 14.1    | 8.2                                       | 6.7                                                    | 2.8                           | 0.5                         | 2.6                                        | 8.2               | 0.8                                        | 7.1   | 10.1   |
| 7                              | .65 to .75          | 4.9                        | 15.3    | 7.4                                       | 4.9                                                    | 1.3                           | 0.5                         | 0.9                                        | 5.3               | 0.4                                        | 5.9   | 11.2   |
| 8                              | .75 to .85          | 3.5                        | 13.3    | 7.1                                       | 4.9                                                    | 0.9                           | 0.9                         | 1.4                                        | 8.8               | 0.5                                        | 3.3   | 9.8    |
| 9                              | .85 to .95          | 1.8                        | 6.7     | 3.0                                       | 2.4                                                    | 0.4                           | 0.7                         | 0.5                                        | 7.4               | 0.3                                        | 0.9   | 4.9    |
| 10                             | .95 to 1            | 4.5                        | 20.1    | 9.8                                       | 6.8                                                    | 0.7                           | 1.0                         | 2.7                                        | 36.6              | 0.9                                        | 3.3   | 12.2   |
| Total (Percent)                |                     | 100                        | 100     | 100                                       | 100                                                    | 100                           | 100                         | 100                                        | 100               | 100                                        | 100   | 100    |
| Implied subjective probability |                     |                            |         |                                           |                                                        |                               |                             |                                            |                   |                                            |       |        |
| Mean                           |                     | 0.39                       | 0.67    | 0.46                                      | 0.36                                                   | 0.25                          | 0.12                        | 0.16                                       | 0.67              | 0.20                                       | 0.39  | 0.58   |
| 10 <sup>th</sup> percentile    |                     | 0.09                       | 0.33    | 0.05                                      | 0.02                                                   | 0.0                           | 0.01                        | 0.01                                       | 0.05              | 0.02                                       | 0.10  | 0.27   |
| 25 <sup>th</sup> percentile    |                     | 0.20                       | 0.51    | 0.21                                      | 0.07                                                   | 0.0                           | 0.02                        | 0.02                                       | 0.47              | 0.04                                       | 0.22  | 0.43   |
| Median                         |                     | 0.36                       | 0.69    | 0.47                                      | 0.30                                                   | 0.20                          | 0.04                        | 0.04                                       | 0.78              | 0.14                                       | 0.37  | 0.54   |
| 75 <sup>th</sup> percentile    |                     | 0.53                       | 0.88    | 0.68                                      | 0.56                                                   | 0.4                           | 0.14                        | 0.20                                       | 0.97              | 0.31                                       | 0.53  | 0.77   |
| 90 <sup>th</sup> percentile    |                     | 0.75                       | 0.98    | 0.94                                      | 0.83                                                   | 0.5                           | 0.41                        | 0.52                                       | 0.99              | 0.50                                       | 0.71  | 0.96   |
| N                              |                     | 3,170                      | 3,157   | 3,145                                     | 3,163                                                  | 3,171                         | 3,162                       | 2,583                                      | 582               | 3,125                                      | 3,125 | 3,123  |

Source: (author?)<sup>20</sup>

**Table A23: Comparison of probabilistic expectation and likelihood-based verbal scale about the likelihood of being infected with HIV**

| Probabilistic expectation:     |                        | Response on verbal likelihood scale |        |        |        |            |        |
|--------------------------------|------------------------|-------------------------------------|--------|--------|--------|------------|--------|
| # beans                        | subjective probability | None                                | Low    | Medium | High   | Don't know | Total  |
| 0                              | 0 to .05               | 88.84                               | 11.43  | 6.29   | 1.89   | 23.81      | 66.75  |
| 1                              | .05 to .15             | 5.75                                | 27.06  | 1.26   | 0.00   | 28.57      | 9.50   |
| 2                              | .15 to .25             | 3.03                                | 25.71  | 5.03   | 1.89   | 19.05      | 7.47   |
| 3                              | .25 to .35             | 1.32                                | 18.32  | 5.66   | 0.94   | 9.52       | 4.78   |
| 4                              | .35 to .45             | 0.40                                | 9.24   | 5.66   | 0.00   | 0.00       | 2.31   |
| 5                              | .45 to .55             | 0.35                                | 7.39   | 71.07  | 6.60   | 19.05      | 5.57   |
| 6                              | .55 to .65             | 0.04                                | 0.17   | 3.77   | 8.49   | 0.00       | 0.54   |
| 7                              | .65 to .75             | 0.04                                | 0.50   | 0.63   | 10.38  | 0.00       | 0.51   |
| 8                              | .75 to .85             | 0.04                                | 0.00   | 0.00   | 25.47  | 0.00       | 0.89   |
| 9                              | .85 to .95             | 0.04                                | 0.00   | 0.63   | 18.87  | 0.00       | 0.70   |
| 10                             | .95 to 1               | 0.13                                | 0.17   | 0.00   | 25.47  | 0.00       | 0.98   |
| Total (Percent)                |                        | 100.00                              | 100.00 | 100.00 | 100.00 | 100.00     | 100.00 |
| Implied subjective probability |                        |                                     |        |        |        |            |        |
| Mean                           |                        | 0.04                                | 0.22   | 0.44   | 0.79   | 0.20       | 0.12   |
| 10 <sup>th</sup> percentile    |                        | 0.01                                | 0.04   | 0.20   | 0.53   | 0.02       | 0.01   |
| 25 <sup>th</sup> percentile    |                        | 0.01                                | 0.10   | 0.45   | 0.70   | 0.05       | 0.02   |
| Median                         |                        | 0.03                                | 0.20   | 0.49   | 0.83   | 0.14       | 0.04   |
| 75 <sup>th</sup> percentile    |                        | 0.04                                | 0.31   | 0.52   | 0.95   | 0.29       | 0.14   |
| 90 <sup>th</sup> percentile    |                        | 0.07                                | 0.43   | 0.54   | 0.98   | 0.50       | 0.42   |
| N                              |                        | 2,277                               | 595    | 159    | 106    | 21         | 3,158  |

Source: (author?)<sup>20</sup>

1 bean among those who said “low likelihood” and 5 beans among those who said “medium likelihood.” However, Table A23 also highlights that there was a great variation in what probability respondents associate with “low likelihood” or “medium likelihood.” For example, a bit more than a quarter of the respondents who said “low likelihood” allocated 1 bean and another quarter allocated 2 beans; 18% allocated 4 beans and 12% allocated 0 beans. This suggests that the bean measure may be more informative to compare risk rankings across individuals.

#### **A6.4. Marital histories and sexual behaviors**

In addition to collecting the current marital status at the time of each MLSFH survey, the MLSFH has also obtained marital histories that include all marriages of MLSFH respondents along with key information pertaining to each marriage. Specifically, the MLSFH marriage histories asked respondents to list the start and end dates of all of their marriages (up to ten marriages). Subsequently, respondents were asked a series of questions about their current/most recent spouse,

previous spouse, and first spouse. Questions included age at marriage, spousal age difference, how long they had known each other, educational attainment before marriage, where they were staying when they first met, spouse's ethnic group, number of children produced, whether husband had another wife when she married him (females only), rank order of wife (females only), and suspected spouse having sexual relations with other women. For marriages that had ended, additional questions were asked about the duration of the marriage, how it ended, and whether the respondent remarried. In 2004, the format of marriage histories changed. Respondents listed up to five marriages starting from their first marriage and answered a series of questions about each marriage. Questions asked included marriage start and end dates (if the marriage had ended), age at marriage, spousal age difference, whether husband had other wives, number of children produced, how the marriage ended, and main reason for divorce/separation.

In 2006, the MLSFH increased the number of marriages that could be listed in marriage histories, up to a maximum of 10, and decreased the number of questions asked about each spouse. For the first time, respondents reported the names of all spouses to whom they were ever married. For each spouse, respondents reported the year marriage began, how many children they had with that spouse, whether or not they were still married to the spouse, if they had ever talked about HIV with their spouse, and if they knew the HIV status of the spouse at the time they got married. If the marriage had ended, they reported the year it ended and the main reason why it ended. With the exception of a few minor changes, the format of marriage histories in 2010 was similar to that of the previous wave. While the MLSFH did not ask about the number of children produced from the marriage, they did ask if the respondent knew his/her HIV status at the time of marriage and whether the respondent's HIV status was the same as that of his or spouse when they got married. In 2012, the MLSFH did not collect full marriage histories. Instead, they asked respondents if they were still married to the spouse(s) they were married to in 2010. If no longer married, they reported how and when the marriage ended. While the MLSFH did not collect information on new spouses, they did ask respondents how many times they had ever been married. This information, in conjunction with data from the previous wave, could be used to determine whether respondents remarried between the 2010 and 2012 waves.

As part of a study investigating the reliability of marriage histories, reconstructed marriage histories were created for respondents who participated in the 2006 and 2010 MLSFH.<sup>28</sup> They were initially created in response to tabulations that a sizable proportion of respondents reported declines in the number of times married over time in the MLSFH. Due to its potential effect on marriage-related analyses, an attempt was made to reconstruct a more complete set of marriage histories using data from the 2006 and 2010 MLSFH. Although reconstructed marriage histories (RMH) may not be entirely complete, they should represent a lower bound in the true number of marriages in the sample. The process of reconstructing marriage histories consisted of two parts. First, marriages were matched across surveys

for each respondent. Because names tend to be spelled differently across survey waves, mostly due to the interpretation of the interviewer, marriages were visually matched on a case-by-case basis. Spouse name and dates of marriage were used to confirm that a marriage listed in 2006 is the same as a marriage listed in 2010. As a next step, all of the marriages reported in 2006 and 2010, even marriages reported only once, are listed in the RMH. These histories contain information on marriage start and end dates (in cases of terminated marriages) and status of marriage. If a marriage is reported only once, then information listed in the original marriage history is used to create the RMH. If a marriage is reported in both waves, then reports of status of marriage, marriage start date, and marriage end date are compared between the two waves. If they are consistent, then they are used to create the RMH. If inconsistent reports are given, then information provided in the earlier survey is used, if reported by the respondent. Data from the earlier survey are used because the marriage in question would have happened closer in time to this survey. If a respondent reports “don’t know”, then data from the later survey is used, if this information was reported. In cases where marriage dates overlap (e.g., there has been a case in the data where the reconstructed dates of her first and second marriage are 1995–2000 and 1999–2006, respectively), corrections were made to marriage start and end dates listed in the RMH. In these cases, data from the later survey was used.<sup>28</sup>

#### **A6.5. Spouse, children and parent linkages in the MLSFH**

**A6.5.a. MLSFH spouse linkages:** The MLSFH sample has been based on married couples since its inception in 1998. Thus, establishing and maintaining linkages between spouses has consistently been an important component of MLSFH research and data collection. To create such linkages between husbands and wives in the MLSFH sample, we have taken the following steps. In addition to individual IDs, each married respondent in the MLSFH sample also has a *spouse ID* that links to the husband or wife to whom the individual is married. For polygamous men, linkages for all spouses are included; MLSFH polygamous men have up to six spouse IDs. Given the large amount of marital turnover in Malawi, these linkages can change over time, and maintenance is required in order to update the linkages. To ensure that the spouse linkages are accurate in each wave, the MLSFH has taken two steps: (1) during *data collection*: as described above, MLSFH survey supervisors are given lists of all MLSFH respondents to be interviewed in each village, which also contains identifying information for the respondent, such as the names of their spouses. These lists also contain a section that requires the supervisor to update the spouse link after the interviewer completes the survey. Upon returning with a completed survey, the supervisor indicates whether the marriage from the prior MLSFH wave is still active, and if not, and the respondent has remarried, a new ID is created for the new spouse and this information is updated in the list. This list is then entered at the end of each day of fieldwork and the dataset subsequently updated; and (2) during *data cleaning*: after data is collected for all MLSFH respondents, the spouse IDs are cleaned. This involves using information

from marriage rosters to identify individuals who experienced marital dissolution in between waves, dropping spouse IDs for currently unmarried respondents, and ensuring that new spouse IDs are present for all who remarried in between waves.

This task is not without challenges, however. Not infrequently one spouse will not be interviewed during fieldwork, in which case we rely on information for only one individual in the marriage. Such information is not always reliable, as discrepancies between reporting of marriage have been found among MLSFH respondents: for example, in the case that a woman reports a marriage but the man reports being married to a different individual. In this case we include the man's ID as spouse of the woman, but not the woman's ID as spouse of the man.

**A6.5.b. MLSFH parent-children linkages:** As with spouse linkages, MLSFH also collects and maintains linkages of parents to children. MLSFH respondents could have a linkage to their parent or child through two different samples: (1) the 2004 MLSFH household roster, and (2) the 2008 MLSFH parents' sample. To establish parent-child linkages for each, we kept track of the index respondent in each case; so in 2004 we linked IDs for MLSFH women whose household roster was used to draw a 2004 MLSFH adolescent; and in 2008 we linked respondents who had a parent added to the sample. In doing so, complications arose for several reasons. First, in many cases we were unaware of siblings in the MLSFH data. In this case two individuals could have listed the same people as parents in the 2008 sample, which would result in duplicates. We cleaned these by name matching and by identifying duplicates during 2010 data collection and removing the extra entry from the dataset. Secondly, some of the 2004 adolescents were drawn only from their mother's household roster, which means that they could be reliably linked with the mother but not the father.

**A6.5.c. Longitudinal linkage of children listed in household/family rosters:** To allow for longitudinal analyses of the information elicited in the above household and transfer rosters, the data on the respondent's children listed in the 2006–2010 MLSFH family and transfer rosters have been linked using names, ages, sex, and birth order. Because not all data were available in every wave, and because the spelling of names is not always exactly identical across waves, the matching was not undertaken with a computerized algorithm, but was done case-by-case instead. Two processes were undertaken. First, names were designated the principal matching variable; so to be considered matched, a minimum similarity in spelling was required. Second, a quality indicator for the quality of the match was assigned to each matched child, with the match being *low quality*, if no other data than the spelling itself was available to establish the match, and the spelling itself was not sufficiently similar across waves, *medium quality*, if any other variable was available (age, sex, birth order) to establish the match or, if no other data was available but the spelling matched very closely, and *high quality*, if two or more variables were available to establish the match.

To illustrate one example of the longitudinal child linkages in the MLSFH, Table A24 compares adolescent children (aged 15–20) that were listed by female MLSFH

**Table A24: Descriptive statistics about linkage of children aged 15–20 in household rosters between 2006 and 2008 (female MLSFH respondents only)**

|                                        | Youth child linked in HH roster |        | Youth not linked in HH roster |        | Total |        |
|----------------------------------------|---------------------------------|--------|-------------------------------|--------|-------|--------|
|                                        | mean                            | sd     | mean                          | sd     | mean  | sd     |
| N                                      | 788                             |        | 164                           |        | 952   |        |
| Youth characteristic in 2008           |                                 |        |                               |        |       |        |
| Age                                    | 17.43                           | (1.68) | 17.38                         | (1.80) | 17.43 | (1.70) |
| Female                                 | 0.51                            | (0.50) | 0.49                          | (0.50) | 0.51  | (0.50) |
| Currently married                      | 0.23                            | (0.42) | 0.23                          | (0.42) | 0.23  | (0.42) |
| Coresident with parents <sup>†</sup>   | 0.65                            | (0.48) | 0.60                          | (0.49) | 0.64  | (0.48) |
| Enrolled in school                     | 0.58                            | (0.49) | 0.52                          | (0.50) | 0.57  | (0.49) |
| Years of completed schooling           | 5.96                            | (2.71) | 5.04                          | (2.88) | 5.80  | (2.76) |
| Subjective health (assessed by mother) |                                 |        |                               |        |       |        |
| excellent                              | 0.41                            | (0.49) | 0.43                          | (0.50) | 0.41  | (0.49) |
| very good                              | 0.39                            | (0.49) | 0.36                          | (0.48) | 0.39  | (0.49) |
| good/poor/very poor                    | 0.19                            | (0.40) | 0.21                          | (0.41) | 0.20  | (0.40) |
| Subjective health score <sup>‡</sup>   | 2.22                            | (0.75) | 2.22                          | (0.77) | 2.22  | (0.75) |

Notes: †: coresidence = residence in same household or compound

‡: subjective health score: 1 = good/poor/very poor; 2 = very good; 3 = excellent

respondents in 2008 depending on whether they could be linked or not linked to the 2006 MLSFH household roster. Female respondents in 2008 had listed in the household rosters 952 children age 15–20, of whom the MLSFH data provide longitudinal linkages for 788 (83%), and 164 children (17%) could not be linked across the 2006 and 2008 household rosters. The main reasons for the failure to link include a misreporting of children and/or their names or other essential information in either the 2006 or the 2008 household roster; because for linked children the essential information was consistently reported in two rounds we expect the data quality for these children to be fairly high. However, linked and unlinked children were very similar in terms of their sociodemographic characteristics. Adolescent children were on average 17 years old, and 23% of them were married in 2008. A high proportion (65% of the linked and 60% of the unlinked children) was co-residing with their mothers. More than half of the adolescent children were enrolled in school, however linked children have on average one more grade of schooling compared to the unlinked children. According to the mothers' reports, over 40% of the adolescent children were in excellent health, about 40% in very good and 20% were in good/poor/very poor health.

#### **A6.6. MLSFH Incentives Study: an experimental design offering financial incentives for maintaining HIV status during 2006–07**

The MLSFH Incentives Study was an experimental design that offered financial incentives for maintaining HIV status during 2006–07 and was implemented sub-

**Table A25: Time line for 2006–07 MLSFH experimental design offering financial incentives for maintaining HIV status**

|      |                                                      |                                                                                   |
|------|------------------------------------------------------|-----------------------------------------------------------------------------------|
| 2006 | May–July<br>August–December                          | HIV Initial Testing + MLSFH Surveys (2006 Round)<br>Incentives Offered            |
| 2007 | April–May<br>July–October                            | Round 1 Sexual Diaries<br>Round 2 Sexual Diaries                                  |
| 2008 | March–August<br>March–August, 1–2<br>weeks after HTC | Round 3 Sexual Diaries + HIV Testing + Incentives Given<br>Round 4 Sexual Diaries |

Source: (author?)<sup>1</sup>

sequent to the 2006 MLSFH data collection.<sup>1</sup> The time line for this project is described in Table A25. In 2006, the MLSFH offered both couple and individual HIV testing and counseling, with the former being offered first to all married couples, and if one of the spouses opted out of couple HIV testing, individual HTC was offered to both members of a couple (Appendix A3.3). Unmarried individuals were only offered individual HTC. As indicated earlier (Appendix A3.3), 92% of the respondents who were offered an HIV test accepted the test during the 2006 MLSFH HTC. Among these, the HIV prevalence rate was 9.2%. For the 2006–07 MLSFH Incentives Study, adult respondents were selected in two steps: first, all adult individuals in HIV-discordant couples were selected; second, we randomly selected adult individuals from the 2006 MLSFH HTC participants. A total of 1,402 individuals who participated in the 2006 MLSFH HTC were offered to participate in this project. These individuals were approached about 1–2 months after the 2006 MLSFH HTC and introduced to the MLSFH Incentive Study. Couples who participated in couple HTC were offered to participate in the MLSFH Incentive Study as couples, with a fall-back option of joining the study as an individual if one of the spouses didn't want to participate. Individuals who participated in individual HTC were offered to participate as individuals. A total of 1,307 (or 93%) individuals were successfully enrolled during the informed consent process (either as part of couples or as individuals). Descriptive statistics for the MLSFH Incentive Study sample are provided in Table A26. 45% of the study population was male, the average age was 36 years, and majority of the sample (84%) were married.

The hypothesis underlying this project was that financial rewards for maintaining one's HIV status would result in changes in HIV-risk behaviors. And while only HIV-negative individuals could change their HIV status during the period, and thus not receive the offered award, the study was offered to both HIV-positive and HIV-negative individuals in the MLSFH to avoid that the exclusion from study participation could be interpreted as an indication of a persons HIV status by the MLSFH interviewers and/or family or community members. To assign the incentives that would be paid in case HIV status was maintained during the study period, each individual or couple randomly drew a token out of a bag to deter-

**Table A26: Descriptive statistics for participants in 2006–07 MLSFH experimental design offering financial incentives for maintaining HIV status**

|                                            | Mean  | Std. Dev. |
|--------------------------------------------|-------|-----------|
| Male                                       | 0.450 | 0.498     |
| Age                                        | 35.78 | 12.96     |
| Married                                    | 0.838 | 0.369     |
| Expenditures                               | 3130  | 5781      |
| Subjective Health                          | 2.065 | 0.935     |
| Number of lifetime sexual partners         | 3.108 | 3.780     |
| Acceptable to use condom                   | 0.405 | 0.491     |
| Ever used condom with current partner      | 0.263 | 0.440     |
| Fear about HIV                             | 1.593 | 0.752     |
| Number friends died of HIV                 | 8.197 | 8.045     |
| Some likelihood of HIV infection (current) | 0.287 | 0.453     |
| Some likelihood of HIV infection (future)  | 0.566 | 0.496     |
| HIV positive at baseline                   | 0.087 | 0.282     |
| Enrolled as a “couple”                     | 0.238 | 0.426     |
| <i>N</i>                                   | 1,307 | –         |

*Notes:* This table presents baseline summary statistics among 1,307 respondents who participated in the incentives program. Expenditures are measured as household expenditures in the past 3 months (on clothes, schooling, medical expenses, fertiliser, agricultural inputs, and funerals). Subjective health represents self-reported health and was phrased: “In general, would you say your health is: Excellent (1), Very Good (2), Good (3), Fair (4), Poor (5).” Number of lifetime sexual partners includes any partner (long-term or short-term) that the respondent had sex with. Fear about HIV was phrased as: “How worried are you that you might catch HIV / AIDS? Not worried at all (1), Worried a little (2), Worried a lot (3).” Some likelihood of infection was coded one if the respondent answered low, medium, high, or don’t know, and zero otherwise. Each variable was measured before incentives were offered.

*Source:* (author?)<sup>1</sup>

mine their incentive amount. The incentive amounts included zero, 500 Kwacha (approximately 4 dollars at the time), or 2,000 Kwacha (approximately 16 dollars at the time) for an individual, or zero, 1,000 Kwacha, or 4,000 Kwacha (approximately 32 dollars) for a couple. The incentives were distributed among the three levels, across both couples and individuals, with an equal probability of receiving each incentive amount. In practice, the realized (ex-post) distribution of the incentives resulted in 35% receiving zero, 32% receiving a medium-level incentive, and 33% receiving a high-level incentive. As a point of reference, these financial incentives were significant when compared to the incomes in this subsistence agriculture context where piecework daily wage rates (ganyu) for farm workers were approximately 20 Kwacha for men and 5–10 Kwacha for women.<sup>101</sup>

After drawing the incentive amount, each individual was given a voucher of the financial amount they randomly drew. Couples were told that both members of the couple must maintain their HIV status in order for the couple to receive the money. Couples who divorced, separated, or for whom one member was away, would



**Table A27: Descriptive statistics, by level of incentives offered, for participants in 2006–07 MLSFH experimental design**

|                                               | <i>Zero<br/>Incentive<br/>(N = 455)</i> | <i>Medium<br/>Incentive<br/>(N = 420)</i> | <i>High<br/>Incentive<br/>(N = 432)</i> | p-value of<br>joint test |
|-----------------------------------------------|-----------------------------------------|-------------------------------------------|-----------------------------------------|--------------------------|
| Male                                          | 0.446                                   | 0.469                                     | 0.435                                   | 0.59                     |
| Age                                           | 34.80                                   | 35.52                                     | 37.07                                   | 0.03                     |
| Married                                       | 0.844                                   | 0.831                                     | 0.838                                   | 0.87                     |
| Expenditures                                  | 3013                                    | 3131                                      | 3250                                    | 0.84                     |
| Subjective Health                             | 2.031                                   | 2.000                                     | 2.163                                   | 0.03                     |
| Number of lifetime<br>sexual partners         | 2.940                                   | 3.349                                     | 3.053                                   | 0.32                     |
| Acceptable to use<br>condom                   | 0.400                                   | 0.392                                     | 0.424                                   | 0.62                     |
| Used condom with<br>current partner           | 0.261                                   | 0.257                                     | 0.271                                   | 0.89                     |
| Fear about HIV                                | 1.597                                   | 1.579                                     | 1.603                                   | 0.89                     |
| Number friends died of<br>HIV                 | 7.816                                   | 8.581                                     | 8.222                                   | 0.40                     |
| Some likelihood of HIV<br>infection (current) | 0.294                                   | 0.288                                     | 0.280                                   | 0.92                     |
| Some likelihood of HIV<br>infection (future)  | 0.593                                   | 0.557                                     | 0.547                                   | 0.38                     |
| HIV positive at baseline                      | 0.105                                   | 0.088                                     | 0.067                                   | 0.13                     |
| Enrolled as a “couple”                        | 0.209                                   | 0.240                                     | 0.266                                   | 0.13                     |

*Notes:* Standard errors in parenthesis. The table presents baseline demographic statistics by incentives amounts among 1,307 respondents who participated in the incentives program. Expenditures are measured as household expenditures in the past 3 months (on clothes, schooling, medical expenses, fertiliser, agricultural inputs, and funerals). Subjective health represents self-reported health and was phrased: “In general, would you say your health is: Excellent (1), Very Good (2), Good (3), Fair (4), Poor (5).” Number of lifetime sexual partners includes any partner (long-term or short-term) that the respondent had sex with). Fear about HIV was phrased as: “How worried are you that you might catch HIV/AIDS? Not worried at all (1), Worried a little (2), Worried a lot (3).” Some likelihood of infection was coded one if the respondent answered low, medium, high, or don’t know, and zero otherwise. Each variable was measured before incentives were offered.

*Source:* (author?)<sup>1</sup>

receive one half of the couple incentives after one year if the individual who tested maintained his/her status. Individuals participating as individuals (rather than as member of couples) were told that they must maintain their HIV status in order to receive the money approximately one year later. Due to logistical issues, the second round of HIV testing—based on which the incentives were paid—was conducted several months occurred approximately 15 months—instead of the initially stated 12 months—after enrollment in the MLSFH Incentives Study. Table A27 presents baseline summary statistics among those offered zero, medium, and high amounts of the incentive.

Approximately three to six months after the incentives were offered and vouchers given out, respondents were interviewed in their homes and asked about their recent sexual behavior. In particular, asked about the previous nine days, asking sexual activities and condom use each day. These interviewer administered diaries were collected three times over the period of the study, which we identify as Round 1, Round 2, and Round 3, respectively. These were unannounced visits that occurred approximately every three months; the same questionnaire was administered each time. At the end of the third round, respondents were visited by a project nurse and were offered another HIV test. This HIV test was tied to the financial incentives and thus was required in order to be eligible to receive any of the financial incentives.

At the end of the study, of the 1,076 HIV-negative individuals who took a test at the follow-up, seven were HIV-positive. Approximately 93% of the sample completed round 1 diaries, 89% completed round 2 diaries, and 92% completed round 3 diaries. Individuals who were HIV-positive in 2006 were less likely to complete rounds, and this became more of a factor over time. HIV-positives were 6.6 percentage points less likely to complete round 1 diaries, 9.9 percentage points less likely to complete round 2 diaries, 10 percentage points less likely to complete round 3 diaries, and 20 percentage points less likely to take the follow-up test. Almost all of the respondents (98%) completed at least one round of diaries, with an average of 2.7 rounds. At the end of the study, 89% of all enrolled respondents obtained a follow-up HIV test after round 3.

#### **A6.7. MLSFH 2009 Biomarker Study**

The collection of biomarker-based indicators of adult health is an important addition to socioeconomic surveys since they can provide valuable insights into biological functions, and the complex causal pathways between socioeconomic environments and health outcomes. The MLSFH implemented a 2009 Biomarker Study that included collection of blood-plasma based biomarkers.<sup>3,4</sup>

**A6.7.a. MLSFH Biomarkers:** The collected MLSFH biomarkers included:<sup>4</sup> a lipids panel consisting of cholesterol, LDL, HDL, and triglycerides, as measures for risk factors for cardiovascular disease; circulating blood glucose and HbA1c (only in cases when the blood glucose was above the normal range) as markers of the metabolic function; markers of organ, specifically renal function and clearance (total protein, uric acid, albumin, urea/blood urea nitrogen (BUN), and creatinine) and wide-range CRP (wrCRP) as a measure of inflammation and the immune function.<sup>102</sup> Few, if any, biomarkers are free-standing reliable diagnostic tools, including those collected as part of the MLSFH. Although the MLSFH biomarkers are generally well-known, and we briefly discuss our reasons for their selection, and the critical levels used for obtaining indicators of health risks.

**Total cholesterol (TC), high-density lipoprotein (HDL), low density lipoprotein (LDL), and triglycerides (TG):** Lipids are fats that store energy for quick release, and to varying degrees, all lipids are recognized risk factors for cardiovascular

disease in the developed world. In the absence of other risk factors, the American Heart Association considers a total cholesterol reading of less than 200mg/dl desirable, 200-230 mg/dl borderline, and in excess of 240mg/dl as conveying a high risk for cardiovascular disease. **Glucose and HbA1c:** Random blood glucose, also known as a non-fasting blood sugar, is a biomarker for the efficiency of the metabolic system. Glucose is the main source of energy for the body. Insulin, the hormone that cells use to metabolize the glucose, is produced in the pancreas. It is released into the blood in response to levels of circulating glucose. A random blood glucose (RBG) tests has two advantages: it does not require respondent fasting and it is less expensive. But because fasting is not a prerequisite for the test, the RBG measure is less precise. The normal range for a random blood sugar test is 70–100 mg/dl. HbA1c measures average blood sugar level for the past two to three months rather than measuring blood sugar levels at one point of time. HbA1c below 5 percent is seen as normal level and a target, although it can range from 4.5 to 6 percent. People with diabetes are characterized by elevated HbA1c levels and for them a level of about 7 percent is a target. In our data collection, HbA1c was not measured for the entire sample, but only for respondents who showed elevated blood glucose levels (i.e., 12 study participants with a mean value of HbA1c of 5.53 and 0.71 std. dev.).

**Creatinine:** Creatinine is one of the waste products in the blood created by the normal breakdown of muscles and circulating levels of creatinine are fairly reliable indicator of the efficacy of kidneys. Normal levels of creatinine in the blood are approximately 0.6 to 1.2 mg/dl in adult males and 0.5 to 1.1 mg/dl in adult females. Any condition that impairs the function of the kidneys will increase creatinine level in the blood. **Albumin:** Like creatinine, serum albumin is used to assess renal and liver function. Albumin is the protein of highest concentration in the blood and maintains oncotic pressure of blood to prevent its leakage into tissue. The normal (U.S.) range for of albumin is 3.5 to 5.5 mg/dl. A low albumin level is correlated with inflammation and malnutrition while high levels signal dehydration. **Total protein:** Unlike fats and carbohydrates, proteins are not stored in the body. They are continuously broken down (metabolized) into amino acids that are used as building blocks for other proteins. The LabAnywhere test is a rough measure of all the proteins found in the plasma, principally albumin and globulin. The normal range of the test is 6.0 to 8.3mg/dl. **Uric Acid:** Uric acid is produced in the body from purine metabolism and excreted by the kidneys. Elevated uric acid is associated with gout, starvation, metabolic syndrome or kidney stones, and decreased uric acid is associated with multiple sclerosis. Normal values of uric acid range between 3.5 and 7.2 mg/dl. **Urea/Blood Urea Nitrogen (BUN):** Blood carries proteins for use by cells throughout the body. After the cells use the protein, the remaining waste products are returned to the blood as urea, a compound containing nitrogen. Healthy kidneys take urea out of the blood and send it to the bladder for excretion. If kidneys are not working well, the urea stays in the blood. Normal blood contains 7 to 20 milligrams of urea per deciliter of blood, and a result of more

than 20 mg/dl indicates that kidneys are not functioning normally.

**C-reactive protein (CRP):** CRP is the most commonly used marker of inflammation and infection. As an acute-phase response protein, CRP can increase as much as 1000-fold in 24 hours. At elevated levels CRP indicates systemic infection or tissue damage, and levels above 3.0 mg/l are generally considered as indicating a high risk for cardiovascular disease. The MLSFH assayed only this biomarker of immune function because of budgetary constraints. The wide-range CRP (wrCRP) assay was used since it detects levels of CRP in the range of 0.012–16.0 mg/l, and thus is sensitive at both very low and very high levels.

**A6.7.b. MLSFH biomarker sample and data collection:** The MLSFH biomarker sample was restricted to Balaka, and the sample was selected in two stages. First, all respondents who were found HIV-positive in a previous MLSFH round were included in the sample. Next, in addition we drew a random sample of approximately 1,500 respondents (aged  $\geq 18$  years) from the 2500 total respondents in the 2008 MLSFH Balaka sample. Because of weather obstacles and failed attempts to find respondents, we were able to contact 1,031 individuals. Of these, 49 respondents (4.7%) refused to participate, and we collected biomarker specimens for 982 respondents, of which approximately 60 cases had previously tested positive for HIV. The characteristics of the MLSFH biomarker sample are reported in Table A28, and Table A29 documents the means, std. deviations and percentiles of the MLSFH biomarkers. The biomarker data collection was approved by the IRB at the University of Pennsylvania (May 9th, 2008) and by the Malawi National Health Sciences Research Council (NHSRC) (December 8th, 2008). The actual field work commenced in mid-January and was completed by early February, 2009.

To avoid the complications associated with dried blood spots (DBS), the MLSFH has tested a new approach for collecting measures of population health and their adaptability to extreme conditions in tropical zones. Our results indicate the reproducibility of biomarkers obtained from the LabAnywhere (previously Demecal) system (LabAnywhere, Haarlem, The Netherlands),<sup>5</sup> a system for the collection of blood plasma that has been used in other large-scale biomarker collections in developed countries.<sup>103–105</sup> The LabAnywhere system required only a few drops of blood harvested from a lancet puncture of a sanitized fingertip. A sponge device was used for absorbing the drop of blood. After the sponge turns completely red, it was dropped into a container with buffer fluid. A gentle swinging motion for 40 seconds was necessary to release the dilution buffer. A filter was used to separate the red blood cells from the plasma. The distinctive feature of this system was that the blood was pressed through a patented filter that separates out plasma. Unlike a clinic based procedure for obtaining blood plasma, the LabAnywhere system did not require the use of a centrifuge. The reliability, sensitivity, and specificity of the test kits had been demonstrated by LabAnywhere in the Netherlands, and the applications of test specific recovery factors yielded a good correlation with results of venous blood samples.<sup>5</sup> In general, LabAnywhere plasma samples are stable for 4 days at 4°C, 2–3 days at room temperature and 1 day at 37°C. While in the

**Table A28: Summary statistics for the 2009 MLSFH biomarker study population**

|                                               | Females<br>mean<br>(sd) | Males<br>mean<br>(sd) | Total<br>mean<br>(sd) |
|-----------------------------------------------|-------------------------|-----------------------|-----------------------|
| # of observations                             | 571                     | 335                   | 906                   |
| Age (in 2008)                                 | 42.17<br>(17.75)        | 43.54<br>(16.87)      | 42.68<br>(17.43)      |
| Age Group                                     |                         |                       |                       |
| < 30                                          | 0.296                   | 0.307                 | 0.300                 |
| 30–39                                         | 0.205                   | 0.131                 | 0.178                 |
| 40–49                                         | 0.186                   | 0.152                 | 0.173                 |
| 50–59                                         | 0.144                   | 0.209                 | 0.168                 |
| 60–69                                         | 0.082                   | 0.140                 | 0.104                 |
| 70+                                           | 0.088                   | 0.060                 | 0.077                 |
| Married (in 2008)                             | 0.762                   | 0.892                 | 0.809                 |
| Muslim (vs Christian/other/none)              | 0.691                   | 0.706                 | 0.696                 |
| Schooling attainment                          |                         |                       |                       |
| <i>No school</i>                              | 0.575                   | 0.320                 | 0.483                 |
| <i>Primary level</i>                          | 0.399                   | 0.618                 | 0.478                 |
| <i>Secondary level</i>                        | 0.026                   | 0.062                 | 0.039                 |
| Body Mass Index (BMI) (2008)                  |                         |                       |                       |
| <i>Underweight (BMI &lt; 18.5)</i>            | 0.143                   | 0.118                 | 0.135                 |
| <i>Normal (18.5 ≤ BMI &lt; 25)</i>            | 0.750                   | 0.837                 | 0.777                 |
| <i>Overweight (25 ≤ BMI &lt; 30)</i>          | 0.092                   | 0.035                 | 0.074                 |
| <i>Obese (BMI ≥ 30)</i>                       | 0.016                   | 0.010                 | 0.014                 |
| BMI unknown                                   | 0.215                   | 0.396                 | 0.282                 |
| HIV positive                                  | 0.084                   | 0.050                 | 0.072                 |
| Subjective health                             |                         |                       |                       |
| <i>Fair/Poor</i>                              | 0.158                   | 0.100                 | 0.136                 |
| <i>Good</i>                                   | 0.307                   | 0.195                 | 0.265                 |
| <i>Very good</i>                              | 0.279                   | 0.298                 | 0.286                 |
| <i>Excellent</i>                              | 0.256                   | 0.407                 | 0.312                 |
| Resp.'s household has                         |                         |                       |                       |
| <i>access to potable water</i>                | 0.843                   | 0.880                 | 0.857                 |
| <i>metal roof on house</i>                    | 0.144                   | 0.159                 | 0.149                 |
| <i>pit latrine</i>                            | 0.782                   | 0.838                 | 0.802                 |
| <i>mosquito nets</i>                          | 0.816                   | 0.828                 | 0.821                 |
| <i>mosquito nets treated with insecticide</i> | 0.652                   | 0.662                 | 0.655                 |

Source: Kohler et al. (2012).<sup>4</sup>

field during the day, the collected specimens were stored in a cooler. Upon returning from the field each day, the biomarker coordinator checked all samples to verify that they were collected and labeled properly; all plasma samples were stored in a -20°C freezer until they were shipped to LabAnywhere. At the end of each week, all biomarker samples were cross-checked with field records, and sent via DHL from Malawi to the LabAnywhere laboratory in the Netherlands for testing. The samples were packed in a special cooler with ice packs provided by LabAnywhere, which were designed specifically for transporting the frozen blood samples, including minimum/maximum thermometers to monitor the cooling conditions.

**Table A29: Summary statistics for the biomarker-based health indicators**

|                                        | Mean  | std. | Percentiles |      |       |       |       |
|----------------------------------------|-------|------|-------------|------|-------|-------|-------|
|                                        |       |      | 5th         | 25th | 50th  | 75th  | 95th  |
| Total cholesterol (TC) (mg/dL)         | 110.4 | 29.6 | 65.6        | 88.8 | 108.1 | 131.3 | 162.2 |
| High-density cholesterol (HDL) (mg/dL) | 32.0  | 10.8 | 15.4        | 23.2 | 30.9  | 38.6  | 50.2  |
| Low-density cholesterol (LDL) (mg/dL)  | 59.0  | 22.3 | 27.0        | 42.5 | 57.9  | 73.4  | 96.5  |
| Triglycerides (TG) (mg/dL)             | 59.5  | 29.6 | 26.5        | 35.4 | 53.1  | 70.8  | 115.0 |
| Glucose (RBG) (mg/dL)                  | 75.0  | 19.5 | 52.3        | 61.3 | 68.5  | 84.7  | 113.5 |
| Creatinine (mg/dL)                     | 0.73  | 0.19 | 0.45        | 0.60 | 0.71  | 0.83  | 1.06  |
| Albumin (ALB) (g/DL)                   | 3.64  | 0.44 | 2.90        | 3.36 | 3.63  | 3.92  | 4.34  |
| Total protein (TP) (mg/DL)             | 6.89  | 0.83 | 5.52        | 6.36 | 6.86  | 7.40  | 8.28  |
| Uric Acid (mg/dL)                      | 4.45  | 1.18 | 2.69        | 3.70 | 4.37  | 5.21  | 6.56  |
| Urea (BUN) (mg/dL)                     | 10.7  | 3.13 | 6.16        | 8.68 | 10.4  | 12.3  | 16.5  |
| C-reactive protein (CRP) (mg/L)        | 4.50  | 11.8 | 0.10        | 0.20 | 0.70  | 2.80  | 25.0  |

Notes: Number of observations (N) varies from 845 (CRP) to 905 (Uric Acid)

Source: (author?)<sup>4</sup>

LabAnywhere was able to analyze 92.7%, or 910 of the 982, samples they received. Table A29 provides summary statistics for the collected MLSFH biomarkers. Upon receiving the test results, MLSFH convened an information session in all participating villages during which potential health concerns identified by the tests were discussed. Individual respondents were given the option to discuss privately their results with a health care counselor. The MLSFH also worked with local health clinics to follow up on any potential health issues that were identified by the biomarker tests. However, except for referrals to local health clinics, no specific treatments were provided as part of the MLSFH biomarker study.

#### **A6.8. 2012 MLSFH mature adults survey on mental health and well-being:**

The 2017 MLSFH 7 survey on mature adults (= adults aged 45 and older) focused on on mental health and well-being, including MLSFH respondents aged 45 and older, who had previously been interviewed in the 2008 and 2010 MLSFH. A total of 1,266 MLSFH mature adults were interviewed (Figure 2) using a questionnaire that continued key elements of the 2008 and 2010 data collections (Table 3) and newly added detailed measures of mental health, cognitive function, and physical performance. The inclusion criteria for the 2012 MLSFH restricted the sample to MLSFH respondents who were aged 45 or older in 2012, and who had been successfully interviewed in both the 2008 and 2010 MLSFH (a restriction that ensured that at least three waves of MLSFH data were available for each participant in the 2012 MLSFH).

Specifically, the measures of mental health and well-being collected as part of the 2012 MLSFH included (Table A30): (1) To assess *mental health*, we collected the following data: (a) continued measurement of the SF12 mental health score that is available since 2006; (b) the depression and anxiety modules of the Patient Health Questionnaire-9 (PHQ-9) that allow to assess both, the presence and the severity

**Table A30: Selected measurements in the 2012 MLSFH mature adult survey on mental health and well-being**

| <i>Construct Definition</i>                                       | <i>Measurement/Scales/Items Source</i>                                                                                                                                                                                             |
|-------------------------------------------------------------------|------------------------------------------------------------------------------------------------------------------------------------------------------------------------------------------------------------------------------------|
| <i>Mental health and depression</i>                               | SF12 mental health score; <sup>106,107</sup> PHQ-9 of the Primary Care Evaluation of Mental Disorders (PRIME-MD) <sup>108-110</sup>                                                                                                |
| <i>Cognitive function</i>                                         | spatial/temporal orientation and language; <sup>111</sup> visual/constructional test; <sup>112</sup> visual/verbal memory, attention/working memory, memory/delayed recall and executive functioning developed by the project team |
| <i>Physical performance</i>                                       | Hand Grip Strength, <sup>113,114</sup> Body Mass Index (BMI), <sup>115</sup> Activities of daily living (ADLs) <sup>116-119</sup>                                                                                                  |
| <i>HIV status</i>                                                 | Determine HIV/1-2 <sup>TM</sup> or Bioline <sup>TM</sup> HIV                                                                                                                                                                       |
| <i>Alcohol Consumption</i>                                        | Alcohol Use based on the Alcohol Use Disorder Identification Test (AUDIT) <sup>120</sup>                                                                                                                                           |
| <i>Subjective risk assessments and probabilistic expectations</i> | Interactive probabilistic expectation elicitation method developed for Malawi and low literacy populations <sup>20,21,100</sup>                                                                                                    |
| <i>Social capital and resource networks</i>                       | MLSFH modules on social capital & family transfer networks <sup>11,121</sup>                                                                                                                                                       |
| <i>Social, demographic and economic background</i>                | Modules repeated from MLSFH questionnaire 2008 & 2010 (Table 3)                                                                                                                                                                    |
| <i>Work efforts and productivity</i>                              | Time devoted to different work activities and intensity of work; work efforts and work-related health limitations                                                                                                                  |

of depression and anxiety disorders;<sup>108-110</sup> (c) detailed information of alcohol consumption since alcohol is the most commonly used psychoactive substance in rural Malawi (and comparable SSA contexts),<sup>122-126</sup> including among HIV+ individuals.<sup>127-134</sup> (2) To assess *cognitive function and performance*, we collected measurements for: (a) spatial/temporal orientation and language based on typical questions used in many different mental status examinations;<sup>111</sup> visual/constructional test to assess space and object perception;<sup>112</sup> (b) visual/verbal memory, attention/working memory, memory/immediate and delayed recall and executive functioning that resemble many clinical tests assessing these functions, but with necessary adaptations to low literacy levels. (3) *Grip strength as a measurement of physical performance*: Grip strength was measured in both hands using a mechanic handheld dynamometer.<sup>113</sup> Grip strength is important as an estimate of the isometric strength in the upper extremity, and it correlates highly with other muscle groups and is often seen as a measurement of overall strength and physical performance.<sup>114</sup> It is a strong predictor of functional limitations, limitations in ADL, morbidity and mortality.<sup>135,136</sup> It is preferable to other measures of physical performance such as climbing stairs, walking on a flat surface, etc. that are difficult to collect and/or inappropriate (e.g., there are no stairs) in rural Malawi.<sup>137</sup> The 2012 MLSFH grip strength measurement followed identical field procedures as those used by the Health and Retirement Study (HRS) and SHARE studies, and as a result, the existing 2012 and proposed 2014 MLSFH grip strength measures represent the *first*

comparable measurements of physical performance between a SSA mature population and the HRS and SHARE study populations. (4) *BMI and HIV testing*: Body mass index (BMI)—an important indicator of nutritional status—was obtained in 2012 from *measured* height and weight, complementing earlier MLSFH BMI data for 2008. In addition, all mature adults who participated in the 2012 data collection were tested for HIV, updating earlier MLSFH HIV tests from 2004–08. (5) *Additional selected measures of well-being*: we continued in 2012 to collect the MLSFH instruments on subjective risks assessments and probabilistic expectations, social capital and resource networks, social, demographic and economic background, and work efforts, productivity and related income/expenditure measures.



**ADDITIONAL REFERENCES CITED IN APPENDIX**

- [51] UNDP. Human Development Report 2010: The Real Wealth of Nations—Pathways to Human Development. New York, NY: United Nations Development Programme (UNDP); 2010. Available from: <http://hdr.undp.org/en/reports/global/hdr2010>.
- [52] UN Population Division. World Population Prospects, the 2012 Revision: Standard (Median) Forecasts; 2012. United Nations, Department of Economic and Social Affairs, Population Division. Available from: <http://esa.un.org/unpd/wpp/>.
- [53] Kohler HP. Population Growth. In: Lomborg B, editor. Global Problems, Smart Solutions. Cambridge, MA: Cambridge University Press; 2013. Earlier version is available as University of Pennsylvania PSC Working Paper 12-03 ([http://repository.upenn.edu/psc\\_working\\_papers/34](http://repository.upenn.edu/psc_working_papers/34)).
- [54] Salomon JA, Wang H, Freeman MK, Vos T, Flaxman AD, Lopez AD, et al. Healthy life expectancy for 187 countries, 1990–2010: A systematic analysis for the Global Burden Disease Study 2010. *Lancet*. 2012;380(9859):2144–2162.
- [55] UNDP. 2010 Malawi Millennium Development Goals Report. New York, NY, and Lilongwe, Malawi: United Nations Development Programme (UNDP) and Malawi Ministry of Development Planning and Cooperation; 2010.
- [56] World Bank. Malawi at a Glance; 2013. World Bank Country Profile. Available from: <http://devdata.worldbank.org/AAG/mwi.aag.pdf>.
- [57] WHO. Malawi: Health Profile; 2013. Geneva: World Health Organization. Available from: <http://www.who.int/gho/countries/mwi.pdf>.
- [58] UNAIDS. Global Report: UNAIDS Report on the Global AIDS Epidemic. New York: World Health Organization and UNAIDS; 2012. Available from: <http://www.unaids.org/globalreport/>.
- [59] Jahn A, Floyd S, Crampin AC, Mwaungulu F, Mvula H, Munthali F, et al. Population-level effect of HIV on adult mortality and early evidence of reversal after introduction of antiretroviral therapy in Malawi. *Lancet*. 2008;371(9624):1603–1611.
- [60] Guebbels E, Bowie C, editors. The Epidemiology of Malawi. College of Medicine, University of Malawi: Special Issue of the *Malawi Medical Journal*; 2006. Available from: <http://www.medcol.mw/commhealth/publications/epi%20book/epidemiology%20book.htm>.
- [61] Chitsulo L, Engels D, Montresor A, Savioli L. The global status of schistosomiasis and its control. *Acta Tropica*. 2000;77(1):41–51.
- [62] Msyamboza KP, Ngwira B, Dzowela T, Mvula C, Kathyola D, Harries AD, et al. The Burden of Selected Chronic Non-Communicable Diseases and Their Risk Factors in Malawi: Nationwide STEPS Survey. *PLoS ONE*. 2011 May;6(5):e20316–.
- [63] Kohler I, Payne C, Kohler HP. The Link between Functional Limitations and Mental Health among Mature and Elderly Adults in Rural Malawi; 2013. Paper presented at the Annual Meeting of the Population Associ-

- ation of America, New Orleans, LA, April 11–13, 2013. Available from: <http://paa2013.princeton.edu/abstracts/131894>.
- [64] Kohler IV, Kalilani-Phiri L, Blank M, Hennessy M, Kohler HP. Mental Health among the Elderly in Sub-Saharan Africa—A Neglected Health Dimension; 2012. Paper presented at the 2012 annual meetings of the Population Association of America, San Francisco, CA, May 3–5, 2012. Available from: <http://paa2012.princeton.edu>.
- [65] Malawi NSO. Malawi: An Atlas of Social Statistics. Lilongwe, Malawi: National Statistics Office of Malawi; 2002. Available from: <http://www.ifpri.org/sites/default/files/publications/malawiatlas.pdf>.
- [66] Trinitapoli J, Regnerus MD. Religious Involvement and HIV/AIDS Risk in Rural Malawi. *Journal for the Scientific Study of Religion*. 2006;45:505–528.
- [67] Grant MJ. Children’s school participation and HIV/AIDS in rural Malawi: The role of parental knowledge and perceptions. *Demographic Research*. 2008;19(45):1603–1634.
- [68] Kerr RB. Food security in northern Malawi: Gender, kinship relations and entitlements in historical context. *Journal of Southern African Studies*. 2005;31(1):53–74.
- [69] USAID, FEWS NET. Malawi Food Security Outlook Update (March 2012): High food prices and a delayed harvest as assistance programs end; 2012. Washington, DC: FEWS NET. Available from: <http://www.fews.net/>.
- [70] Verheijen JZ. Balancing Men, Moral, and Money: Women’s Agency Between HIV and Security in a Malawi Village; 2013. Ph.D. Dissertation, Amsterdam Institute of Social Science Research.
- [71] Malawi DHS. Knowledge, Attitudes and Practices in Health Survey 1996. Malawi National Statistical Office and ORC Macro, Laverton, Maryland; 1997. Available from: <http://www.measuredhs.com>.
- [72] Watkins S, Behrman JR, Kohler HP, Zulu EM. Introduction to “Research on Demographic Aspects of HIV/AIDS in Rural Africa”. *Demographic Research*. 2003;Special Collection 1(1):1–30.
- [73] Adams J, Anglewicz P, Helleringer S, Manyamba C, Mwera J, Reniers G, et al. Identifying Elusive and Eager Would-be Respondents in Longitudinal Data Collection; 2013. Unpublished working paper, Population Studies Center, University of Pennsylvania, Philadelphia, PA.
- [74] Bignami-Van Assche S, Fleming P, Van Assche A, van de Ruit C, Anglewicz P. HIV/AIDS and Time Allocation in Rural Malawi. *Demographic Research*. 2011;24(27):671–708.
- [75] Malawi MOH and NAC. Voluntary Counseling and Testing Guidelines For Malawi; 2003. Malawi Ministry of Health and Population and Malawi National AIDS Commission.
- [76] World Health Organization. Rapid HIV Tests: Guidelines for Use in HIV Testing and Counselling Services in Resource-constrained Settings. Geneva, Switzerland: World Health Organization; 2004. Available from: URL:<http://www.who.int>

- //www.who.int/hiv/pub/VCT/en/rapidhivtestsens.pdf.
- [77] Kaler A, Watkins S. Asking God About the Date You Will Die: HIV Testing as a Zone of Uncertainty in Rural Malawi. *Demographic Research*. 2010;23(32):905–932.
- [78] Weinreb AA, Stecklov G. Social inequality and HIV-testing: Comparing home- and clinic-based testing in rural Malawi. *Demographic Research*. 2009;21(21):627–646.
- [79] Bignami-Van Assche S, Smith K, Reniers G, Anglewicz P, Thornton R, Chao LW, et al. Protocol for biomarker testing in the 2004 Malawi Diffusion and Ideational Change Project; 2004. University of Pennsylvania, Social Networks Project Working Paper No. 6 (June 2004).
- [80] Obare F. Nonresponse in Repeat Population-Based Voluntary Counseling and Testing for HIV in Rural Malawi. *Demography*. 2010;47(3):651–665.
- [81] Godlonton S, Thornton R. Peer Effects in Learning HIV Results. *Journal of Development Economics*. 2012;97(1):118–129.
- [82] Malawi DHS. Malawi Demographic and Health Survey 2004 (Final Report). Malawi National Statistical Office and ORC Macro, Laverton, Maryland, 2005; 2004. Available from: <http://www.measuredhs.com>.
- [83] Boerma JT, Urassa M, Nnko S, Ng'weshemi J, Isingo R, Zaba B, et al. Sociodemographic context of the AIDS epidemic in a rural area in Tanzania with a focus on people's mobility and marriage. *Sexually Transmitted Infections*. 2002;78(Suppl. 1):i97–i105.
- [84] Malawi IHS. Malawi Integrated Household Survey 2010–11; 2012. Malawi National Statistical Office, Zomba, Malawi, and The World Bank, Washington, DC. Available from: <http://microdata.worldbank.org/index.php/catalog/1003>.
- [85] Fitzgerald J, Gottschalk P, Moffitt R. An analysis of sample attrition in panel data – The Michigan Panel Study of Income Dynamics. *Journal of Human Resources*. 1998;33(2):251–299.
- [86] Thomas D, Witoelar F, Frankenberg E, Sikoki B, Strauss J, Sumantri C, et al. Cutting the costs of attrition: Results from the Indonesia Family Life Survey. *Journal of Development Economics*. 2012;98(1):108–123.
- [87] Beckett S, Gould W, Lillard L, Welch F. The Panel Study of Income Dynamics after Fourteen Years: An Evaluation. *Journal of Labor Economics*. 1988;6(4):472–492.
- [88] Ashenfelter O, Deaton A, Solon G. Collecting Panel Data in Developing Countries: Does it Make Sense?; 1986. Living Standards Measurement Study Working Paper 23, World Bank, Washington D.C. Available from: [http://www.princeton.edu/~deaton/downloads/Collecting\\_Panel\\_Data\\_in\\_Developing\\_Countries.pdf](http://www.princeton.edu/~deaton/downloads/Collecting_Panel_Data_in_Developing_Countries.pdf).
- [89] Thomas D, Frankenberg E, Smith JP. Lost but Not Forgotten: Attrition and Follow-up in the Indonesia Family Life Survey. *Journal of Human Resources*. 2001;36(3):556–592.

- [90] Norris SA, Richter LM, Fleetwood SA. Panel studies in developing countries: case analysis of sample attrition over the past 16 years within the birth to twenty cohort in Johannesburg, South Africa. *Journal of International Development*. 2007;19(8):1143–1150.
- [91] Doctor HV, Weinreb AA. Estimation of AIDS adult mortality by verbal autopsy in rural Malawi. *AIDS*. 2003;17(17):2509–2513.
- [92] Falaris EM. The effect of survey attrition in longitudinal surveys: Evidence from Peru, Côte d’Ivoire and Vietnam. *Journal of Development Economics*. 2003;70(1):133–157.
- [93] Clark S. Extra-Marital Sexual Partnerships and Male Friendships in Rural Malawi. *Demographic Research*. 2010;22(1):1–28.
- [94] Behrman JR, Kohler HP, Watkins SC. Social Networks and Changes in Contraceptive Use Over Time: Evidence from a Longitudinal Study in Rural Kenya. *Demography*. 2002;39(4):713–736.
- [95] Helleringer S, Kohler HP. Social Networks, Risk Perceptions and Changing Attitudes Towards HIV/AIDS: New Evidence from a Longitudinal Study Using Fixed-Effect Estimation. *Population Studies*. 2005;59(3):265–282.
- [96] Bühler C, Kohler HP. Talking about AIDS: The Influence of Communication Networks on Individual Risk Perceptions of HIV/AIDS Infection and Favored Protective Behaviors in South Nyanza District, Kenya. *Demographic Research*. 2003;Special Collection 1(13):398–438.
- [97] Watkins SC, Warriner I. How Do We Know We Need to Control for Selectivity? *Demographic Research*. 2003;Special Collection 1(4):109–142.
- [98] Kohler HP, Behrman JR, Watkins SC. The Density of Social Networks and Fertility Decisions: Evidence from South Nyanza District, Kenya. *Demography*. 2001;38(1):43–58.
- [99] Delavande A, Gine X, McKenzie D. Measuring Subjective Expectations in Developing Countries: A Critical Review and New Evidence. *Journal of Development Economics*. 2011;94:151–163.
- [100] Delavande A, Kohler HP. HIV/AIDS-related Expectations and Risky Behavior in Malawi; 2011. Population Studies Center, University of Pennsylvania, Working Paper 11-04. Available from: [http://repository.upenn.edu/psc\\_working\\_papers/28](http://repository.upenn.edu/psc_working_papers/28).
- [101] Whiteside M. When the whole is more than the sum of the parts: The effect of cross-border interactions on livelihood security in southern Malawi and northern Mozambique; 1998. Report for Oxfam GB. Available from: <http://www.eldis.org/vfile/upload/1/document/0708/DOC6586.pdf>.
- [102] Maharshak N, Arbel Y, Gal-Oz A, Rogowski O, Shapira I, Berliner S, et al. Comparative analysis of Bayer wide-range C-reactive protein (wr-CRP) and the Dade-Behring high sensitivity C-reactive protein (hs-CRP) in patients with inflammatory bowel disease. *Journal of Digestive Diseases*. 2008;9(3):140–143.
- [103] de Beer M, van Eijsden M, Vrijkotte T, Gemke R. Early growth patterns and

- cardiometabolic function at the age of 5 in a multiethnic birth cohort: the ABCD study. *BMC Pediatrics*. 2009;9(1):23.
- [104] van Dijk A, van Eijsden M, Stronks K, Gemke R, Vrijkotte T. Cardio-metabolic risk in 5-year-old children prenatally exposed to maternal psychosocial stress: the ABCD study. *BMC Public Health*. 2010;10(1):251.
- [105] van Stralen M, te Velde S, Singh A, De Bourdeaudhuij I, Martens M, van der Sluis M, et al. European Energy Balance Research to prevent excessive weight gain among youth (ENERGY) project: Design and methodology of the ENERGY cross-sectional survey. *BMC Public Health*. 2011;11(1):65.
- [106] Ware JE, Kosinski M, Keller SD. SF-12: How to Score the SF12 Physical & Mental Health Summary Scales, Third Edition. Lincoln, RI: QualityMetric; 2001.
- [107] Ware JE, Kosinski M, Keller SD. A 12-Item Short-Form Health Survey: Construction of scales and preliminary tests of reliability and validity. *Medical care*. 1996;34(3):220.
- [108] Spitzer RL, Williams JBW, Kroenke K, Linzer M, deGruy III FV, Hahn SR, et al. Utility of a new procedure for diagnosing mental disorders in primary care: the PRIME-MD 1000 study. *JAMA*. 1994;272(22):1749.
- [109] Kroenke K, Spitzer RL, Williams JBW. The PHQ-9. *Journal of General Internal Medicine*. 2001;16(9):606–613.
- [110] PHQ Website. Patient Health Questionnaire (PHQ) Screeners: Screener Overview; 2011. Accessed on March, 5th 2011. Available from: <http://www.phqscreeners.com/overview.aspx>.
- [111] DeRenzi E, Vignolo L Brain. The Token Test: A sensitive test to detect receptive disturbances in aphasics. *Brain*. 1962;85:665–678.
- [112] Warrington E, James M. The Visual Object and Space Perception Battery. Bury St. Edmunds, Suffolk, England: Thames Valley Test Company.; 1991.
- [113] Frederiksen H, Hjelmberg J, Mortensen J, MCGue M, Vaupel JW, Christensen K. Age trajectories of grip strength: cross-sectional and longitudinal data among 8,342 Danes aged 46 to 102. *Annals of Epidemiology*. 2006;16(7):554–562.
- [114] Rantanen T, Era P, Kauppinen M, Heikkinen E. Maximal isometric muscle strength and socioeconomic status, health, and physical activity in 75-year-old persons. *J Aging Phys Activity*. 1994;2:206–220.
- [115] Molini V, Nubé M, van den Boom B. Adult BMI as a Health and Nutritional Inequality Measure: Applications at Macro and Micro Levels. *World Development*. 2010;38(7):1012–1023.
- [116] Gama EV, Damián JE, Pérez de Molino J, López MR, López Pérez M, Gavira Iglesias FJ. Association of individual activities of daily living with self-rated health in older people. *Age and Ageing*. 2000;29(3):267–270.
- [117] Bedirhan U, Chatterji S, Kostanjsek S, et al. WHO assessment schedule for measuring disability: Developing the World Health Organization Disability Assessment Schedule 2.0. *Bulletin of the World Health Organization*. 2010;.

- [118] WHO. Disability Assessment Scale version 11; 2000. Phase 2 Field Trials–Health Services Research: 12-Item Interviewer Administered Version. Geneva: WHO.
- [119] Stineman MG, Xie D, Pan Q, Kurichi JE, Saliba D, Streim J. Activity of Daily Living Staging, Chronic Health Conditions, and Perceived Lack of Home Accessibility Features for Elderly People Living in the Community. *Journal of the American Geriatrics Society*. 2011;59(3):454–462.
- [120] Babor TF, Higgins-Biddle JC, Saunders JB, Monteiro MG. The Alcohol Use Disorders Identification Test (AUDIT): Guidelines for use in primary care; 2001. 2nd Edition, World Health Organization Department of Mental Health and Substance Abuse. (Accessed: June 4, 2011). Available from: [http://www.who.int/hq/2001/who\\_msd\\_msb\\_01.6a.pdf](http://www.who.int/hq/2001/who_msd_msb_01.6a.pdf).
- [121] Kohler IV, Kohler HP, Behrman JR, Kalilani-Phiri L. Shocks, Family Transfers and Youth-Transitions in Rural Malawi; 2011. Unpublished manuscript, Population Studies Center, University of Pennsylvania. Presented at the World Bank and Jacobs Foundation conference on “Children and Youth in Crisis” in Marbach, Germany, May 5–6, 2011.
- [122] Parry CDH. South Africa: alcohol today. *Addiction*. 2005;100(4):426–429.
- [123] Parry CDH, Myers B, Morojele NK, Flisher AJ, Bhana A, Donson H, et al. Trends in adolescent alcohol and other drug use: findings from three sentinel sites in South Africa (1997-2001). *Journal of Adolescence*. 2004;27(4):429–440.
- [124] Shisana O, Rehle T, Simbayi L, Parker W, Zuma K, Bhana A, et al. South African national HIV prevalence, HIV incidence, behaviour and communication survey, 2005. Human Sciences Research Council; 2005.
- [125] Fisher JC, Bang H, Kapiga SH. The association between HIV infection and alcohol use: A systematic review and meta-analysis of African studies. *Sexually Transmitted Diseases*. 2007;34(11):856.
- [126] Kalichman SC, Simbayi LC, Kaufman M, Cain D, Jooste S. Alcohol use and sexual risks for HIV/AIDS in sub-Saharan Africa: Systematic review of empirical findings. *Prevention Science*. 2007;8(2):141–151.
- [127] Weinhardt LS, Carey MP. Does alcohol lead to sexual risk behavior? Findings from event-level research. *Annual Review of Sex Research*. 2000;11:125. Available from: <http://www.ncbi.nlm.nih.gov/pmc/articles/PMC2426779/>.
- [128] Burnam MA, Bing EG, Morton SC, Sherbourne C, Fleishman JA, London AS, et al. Use of Mental Health and Substance Abuse Treatment Services Among Adults With HIV in the United States. *Arch Gen Psychiatry*. 2001;58(8):729–736. Available from: <http://archpsyc.ama-assn.org/cgi/content/abstract/58/8/729>.
- [129] Dausey DJ, Desai RA. Psychiatric comorbidity and the prevalence of HIV infection in a sample of patients in treatment for substance abuse. *Journal of Nervous and Mental Disease*. 2003;191(1):10.
- [130] Whetten K, Reif SS, Napravnik Sea. Substance abuse and symptoms of

- mental illness among HIV-positive persons in the Southeast. *South Med J.* 2005;98:9–14.
- [131] Klinkenberg WD, Sacks S. Mental disorders and drug abuse in persons living with HIV/AIDS. *AIDS Care.* 2004;16(Suppl 1):S22–S42.
- [132] Stoff DM, Mitnick L, Kalich. Research issues in the multiple diagnosis of HIV/AIDS, mental illness and substance abuse. *AIDS Care.* 2004;16(Suppl. 1):S1–S5.
- [133] Perkins D, Stern R, Golden R, Murphy C, Naftolowitz D, Evans D. Mood disorders in HIV infection: prevalence and risk factors in a nonepicenter of the AIDS epidemic. *American Journal of Psychiatry.* 1994;151(2):233–236. Available from: <http://ajp.psychiatryonline.org/cgi/content/abstract/151/2/233>.
- [134] Atkinson JH, Grant I. Natural history of neuropsychiatric manifestations of HIV disease. *Psychiatric Clinics of North America.* 1994;17:17–33.
- [135] Nybo H, Gaist D, Jeune B, McGue M, Vaupel JW, Christensen K. Functional Status and Self-Rated Health in 2,262 Nonagenarians: The Danish 1905 Cohort Survey. *Journal of the American Geriatrics Society.* 2001;49(5):601–609.
- [136] Rantanen T, Harris T, Leveille SG, Visser M, Foley D, Masaki K, et al. Muscle strength and body mass index as long-term predictors of mortality in initially healthy men. *Journal of Gerontology Series A: Biological Sciences and Medical Sciences.* 2000;55(3):M168.
- [137] Robertson K, Liner J, Heaton R. Neuropsychological assessment of HIV-infected populations in international settings. *Neuropsychology Review.* 2009;19(2):232–249.
